# Supplementary material for: Unraveling candidate genes underlying biomass digestibility in elephant grass (Cenchrus purpureus)
Source: PubMed Central journal article supplement (PMC6905061; doi:10.1186/s12870-019-2180-5), 2019-12-10
Supplement: 12870_2019_2180_MOESM1_ESM.pdf [file 12870_2019_2180_MOESM1_ESM.pdf]

**Table S1** Genotypes used in this study and their respective codes. The genotypes are part of the Active Elephant grass Germplasm Bank (BAGCE) maintained by Embrapa Gado de Leite (Embrapa Dairy Cattle).

| Code | BAGCE registration          | Code | BAGCE registration            | Code | BAGCE registration | Code | BAGCE registration |
|------|-----------------------------|------|-------------------------------|------|--------------------|------|--------------------|
| 1    | Elefante da Colômbia        | 26   | Mineiro                       | 51   | Guaco              | 76   | 12 AD IRI          |
| 2    | BAGCE 2                     | 27   | Mole de Volta Grande          | 52   | Cuba-115           | 77   | 07 AD IRI          |
| 3    | Tres Rios                   | 28   | Porto Rico                    | 53   | Cuba-116           | 78   | Pasto Panamá       |
| 4    | Napier Volta Grande         | 29   | Napier                        | 54   | Cuba-169           | 79   | BAGCE 92           |
| 5    | Mercker Santa Rita          | 30   | Mercker Comum                 | 55   | King Grass         | 80   | 09 AD IRI          |
| 6    | Pusa Napier Nº 2            | 31   | Terezópolis                   | 56   | Roxo Botucatu      | 81   | 11 AD IRI          |
| 7    | Gigante de Pinda            | 32   | Taiwan A-26                   | 57   | Mineirão IPEACO    | 82   | 05 AD IRI          |
| 8    | Napier Goiano               | 33   | Duro de Volta Grande          | 58   | Vruckwona Africano | 83   | 06 AD IRI          |
| 9    | Mercker S. E. A.            | 34   | Mercker Comum Pinda           | 59   | Cameroon           | 84   | 01 AD IRI          |
| 10   | Taiwan A-148                | 35   | Turrialba                     | 60   | BAGCE 69           | 85   | 04 AD IRI          |
| 11   | Porto Rico 534-B            | 36   | Taiwan A-146                  | 61   | Guaçu              | 86   | 13 AD IRI          |
| 12   | Taiwan A-25                 | 37   | Cameroon - Piracicaba         | 62   | Napierzinho        | 87   | 03 AD IRI          |
| 13   | Albano                      | 38   | Taiwan A-121                  | 63   | IJ 7125            | 88   | 02 AD IRI          |
| 14   | Híbrido Gigante da Colômbia | 39   | Vruckwona                     | 64   | IJ 7126            | 89   | 08 AD IRI          |
| 15   | Pusa Gigante Napier         | 40   | T241 Piracicaba               | 65   | IJ 7127            | 90   | Pioneiro           |
| 16   | Elefante Híbrido 534-A      | 41   | BAGCE 50                      | 66   | IJ 7136            | 91   | Banhado            |
| 17   | Costa Rica                  | 42   | BAGCE 51                      | 67   | IJ 7139            | 92   | Roxo Farroupilha   |
| 18   | Cubano de Pinda             | 43   | Elefante Cachoeiro Itapemirim | 68   | IJ 7141            | 93   | Roxo de Canguçu    |
| 19   | Mercker Pinda               | 44   | Sem Pelo                      | 69   | Goiano             | 94   | Roxo do Itassú     |
| 20   | Mercker 86 México           | 45   | Capim Cana D'África           | 70   | CAC 262            | 95   | BRS Capiacu        |
| 21   | Taiwan A-144                | 46   | Kizozí                        | 71   | Ibitinema          | 96   | CNPGL 91-06-3      |
| 22   | Napier S.E.A.               | 47   | Gramafante                    | 72   | Australiano        | 97   | CNPGL 96-25-3      |
| 23   | Taiwan A-143                | 48   | Roxo                          | 73   | BAGCE 82           | 98   | BRS Canará         |
| 24   | Pusa Napier Nº 1            | 49   | Mott                          | 74   | 13 AD              | 99   | CNPGL 94-49-6      |
| 25   | Elefante de Pinda           | 50   | BAGCE 59                      | 75   | 10 AD IRI          | 100  | PCM 0701           |
