# Supplementary material for: Unraveling candidate genes underlying biomass digestibility in elephant grass (Cenchrus purpureus)
Source: PubMed Central journal article supplement (PMC6905061; doi:10.1186/s12870-019-2180-5), 2019-12-10
Supplement: 12870_2019_2180_MOESM2_ESM.pdf [file 12870_2019_2180_MOESM2_ESM.pdf]

**Table S2** Phenotyping data for the 100 elephant grass genotypes obtained on five cuttings (days 250, 500, 815, 1405 and 1615 after the uniformity cut). Abbreviations used: Cut (cutting day), Gen (genotype - see codes in Table S1), Cut.Rep (concatenation of cut and rep columns), int (genotype bycutting interaction), rep (replication), HDT (height, in meters), GB (green biomass, in Mg ha-1), DB (dry biomass, in Mg ha-1), DM (dry matter concentration, in %), ADF (acid detergent fiber, in g Kg-1), NDF (neutral detergent fiber, in g Kg-1), DIG (biomass digestibility, in g Kg-1), and LIG (Lignin content, in g Kg-1).

| Cut | Gen | Cut.Rep | Plot | Int | Block | Rep | Height | GB    | DB    | DM   | ADF   | NDF   | DIG   | LIG   |
|-----|-----|---------|------|-----|-------|-----|--------|-------|-------|------|-------|-------|-------|-------|
| 250 | 1   | 1       | 11   | 11  | 1     | 1   | 3.23   | 46.75 | 19.68 | 0.42 | 51.50 | 79.60 | 33.21 | 10.47 |
| 250 | 2   | 1       | 21   | 21  | 1     | 1   | 4.35   | 56.17 | 20.04 | 0.36 | 53.37 | 80.19 | 33.36 | 10.37 |
| 250 | 3   | 1       | 31   | 31  | 1     | 1   | 3.85   | 30.00 | 12.92 | 0.43 | 49.48 | 76.69 | 36.16 | 9.09  |
| 250 | 4   | 1       | 41   | 41  | 1     | 1   | 3.10   | 32.11 | 13.15 | 0.41 | 51.73 | 79.73 | 33.57 | 9.67  |
| 250 | 5   | 1       | 51   | 51  | 1     | 1   | 2.75   | 28.17 | 13.36 | 0.47 | 48.00 | 76.53 | 37.13 | 8.03  |
| 250 | 6   | 1       | 61   | 61  | 1     | 1   | 3.95   | 14.83 | 6.98  | 0.47 | 54.44 | 83.25 | 33.05 | 10.35 |
| 250 | 7   | 1       | 71   | 71  | 1     | 1   | 2.98   | 36.83 | 17.02 | 0.46 | 53.95 | 81.74 | 30.82 | 10.77 |
| 250 | 8   | 1       | 81   | 81  | 1     | 1   | 2.80   | 20.50 | 8.99  | 0.44 | 49.11 | 78.34 | 34.50 | 9.10  |
| 250 | 9   | 1       | 91   | 91  | 1     | 1   | 3.25   | 30.37 | 13.03 | 0.43 | 48.16 | 77.02 | 38.13 | 8.35  |
| 250 | 10  | 1       | 101  | 101 | 1     | 1   | 3.40   | 34.91 | 14.58 | 0.42 | 50.48 | 77.36 | 36.11 | 8.35  |
| 250 | 11  | 1       | 111  | 111 | 2     | 1   | 3.45   | 34.46 | 16.63 | 0.48 | 50.46 | 77.22 | 37.38 | 8.99  |
| 250 | 12  | 1       | 121  | 121 | 2     | 1   | 3.25   | 35.83 | 13.80 | 0.39 | 48.88 | 77.24 | 36.66 | 9.94  |
| 250 | 13  | 1       | 131  | 131 | 2     | 1   | 3.45   | 27.00 | 10.67 | 0.40 | 50.56 | 78.75 | 36.28 | 8.39  |
| 250 | 14  | 1       | 141  | 141 | 2     | 1   | 3.60   | 21.78 | 10.21 | 0.47 | 51.70 | 80.43 | 33.93 | 9.69  |
| 250 | 15  | 1       | 151  | 151 | 2     | 1   | 3.05   | 41.56 | 13.30 | 0.32 | 52.46 | 78.17 | 35.38 | 10.28 |
| 250 | 16  | 1       | 161  | 161 | 2     | 1   | 3.05   | 26.86 | 8.73  | 0.33 | 49.99 | 77.33 | 33.80 | 10.21 |
| 250 | 17  | 1       | 171  | 171 | 2     | 1   | 3.60   | 34.81 | 10.67 | 0.31 | 51.36 | 78.08 | 33.96 | 10.37 |
| 250 | 18  | 1       | 181  | 181 | 2     | 1   | 2.70   | 22.68 | 8.01  | 0.35 | 49.63 | 77.74 | 37.92 | 9.04  |
| 250 | 19  | 1       | 191  | 191 | 2     | 1   | 3.00   | 40.83 | 19.49 | 0.48 | 48.74 | 76.83 | 37.38 | 9.22  |
| 250 | 20  | 1       | 201  | 201 | 2     | 1   | 2.80   | 29.33 | 13.85 | 0.47 | 49.33 | 77.44 | 36.67 | 9.26  |
| 250 | 21  | 1       | 211  | 211 | 3     | 1   | 3.50   | 36.17 | 19.36 | 0.54 | 49.94 | 78.28 | 35.81 | 8.88  |
| 250 | 22  | 1       | 221  | 221 | 3     | 1   | 3.05   | 20.40 | 10.81 | 0.53 | 53.51 | 81.14 | 34.75 | 9.62  |
| 250 | 23  | 1       | 231  | 231 | 3     | 1   | 2.95   | 37.17 | 10.71 | 0.29 | 51.37 | 76.45 | 32.14 | 10.08 |
| 250 | 24  | 1       | 241  | 241 | 3     | 1   | 3.05   | 26.50 | 13.24 | 0.50 | 49.61 | 78.42 | 37.37 | 8.87  |
| 250 | 25  | 1       | 251  | 251 | 3     | 1   | 2.70   | 27.41 | 8.99  | 0.33 | 56.72 | 81.50 | 31.32 | 11.60 |
| 250 | 26  | 1       | 261  | 261 | 3     | 1   | 2.50   | 31.53 | 13.07 | 0.42 | 49.11 | 77.11 | 37.15 | 8.73  |
| 250 | 27  | 1       | 271  | 271 | 3     | 1   | 2.30   | 39.00 | 11.64 | 0.42 | 51.50 | 79.46 | 34.47 | 9.51  |
| 250 | 28  | 1       | 281  | 281 | 3     | 1   | 2.40   | 39.79 | 13.09 | 0.33 | 50.02 | 76.67 | 36.01 | 8.52  |

**Table S2** Continued.

| Cut | Gen | Cut.Rep | Plot | Int | Block | Rep | Height | GB    | DB    | DM   | ADF   | NDF   | DIG   | LIG   |
|-----|-----|---------|------|-----|-------|-----|--------|-------|-------|------|-------|-------|-------|-------|
| 250 | 29  | 1       | 291  | 291 | 3     | 1   | 2.8    | 24.07 | 9.39  | 0.39 | 50.75 | 79.23 | 36.5  | 8.74  |
| 250 | 30  | 1       | 301  | 301 | 3     | 1   | 2.45   | 28.17 | 10.32 | 0.37 | 50.86 | 79.06 | 37.2  | 9.16  |
| 250 | 31  | 1       | 311  | 311 | 4     | 1   | 3.65   | 39.67 | 19.76 | 0.5  | 51.43 | 79.56 | 32.14 | 9.97  |
| 250 | 32  | 1       | 321  | 321 | 4     | 1   | 3.05   | 33.17 | 13.27 | 0.4  | 52.31 | 78.66 | 33.9  | 9.98  |
| 250 | 33  | 1       | 331  | 331 | 4     | 1   | 3.45   | 35.17 | 12.49 | 0.36 | 50.97 | 78.1  | 36.57 | 9.36  |
| 250 | 34  | 1       | 341  | 341 | 4     | 1   | 3      | 23.83 | 9.48  | 0.4  | 50.22 | 78.8  | 37.49 | 9.08  |
| 250 | 35  | 1       | 351  | 351 | 4     | 1   | 3.25   | 25.67 | 9.12  | 0.36 | 50.22 | 76.58 | 33.89 | 9.95  |
| 250 | 36  | 1       | 361  | 361 | 4     | 1   | 3.55   | 45.17 | 16.25 | 0.36 | 48.9  | 78.02 | 35    | 9.52  |
| 250 | 37  | 1       | 371  | 371 | 4     | 1   | 3.35   | 53.33 | 22.92 | 0.43 | 50.23 | 79.34 | 35.9  | 8.91  |
| 250 | 38  | 1       | 381  | 381 | 4     | 1   | 2.4    | 24.24 | 12.55 | 0.52 | 49.84 | 78.85 | 33.45 | 9.76  |
| 250 | 39  | 1       | 391  | 391 | 4     | 1   | 3.2    | 50.35 | 22.46 | 0.45 | 52.92 | 80.25 | 32.3  | 10.08 |
| 250 | 40  | 1       | 401  | 401 | 4     | 1   | 3.6    | 33.7  | 14.19 | 0.42 | 48.47 | 75.87 | 35.81 | 9.18  |
| 250 | 41  | 1       | 411  | 411 | 5     | 1   | 2.6    | 23.83 | 11.85 | 0.5  | 50.79 | 79.54 | 35.26 | 9.74  |
| 250 | 42  | 1       | 421  | 421 | 5     | 1   | 3.3    | 62.16 | 23.01 | 0.37 | 53.25 | 81.25 | 34.87 | 9.52  |
| 250 | 43  | 1       | 431  | 431 | 5     | 1   | 2.75   | 27.71 | 12.78 | 0.46 | 51.91 | 79.91 | 34.69 | 9.72  |
| 250 | 44  | 1       | 441  | 441 | 5     | 1   | 2.45   | 37.5  | 19.71 | 0.53 | 46.92 | 76.61 | 35.64 | 8.5   |
| 250 | 45  | 1       | 451  | 451 | 5     | 1   | 2.85   | 23.83 | 9.67  | 0.41 | 48.76 | 76.81 | 35.47 | 8.55  |
| 250 | 46  | 1       | 461  | 461 | 5     | 1   | 2.95   | 23.83 | 11.26 | 0.47 | 46.95 | 76.82 | 37.76 | 8.33  |
| 250 | 47  | 1       | 471  | 471 | 5     | 1   | 2.75   | 25.17 | 12.12 | 0.48 | 48.93 | 77.82 | 36.36 | 8.93  |
| 250 | 48  | 1       | 481  | 481 | 5     | 1   | 3.55   | 35.81 | 13    | 0.36 | 50.77 | 78.39 | 34.53 | 10.16 |
| 250 | 49  | 1       | 491  | 491 | 5     | 1   | 1.35   | 10.22 | 5.06  | 0.5  | 47.51 | 75.83 | 38.4  | 7.5   |
| 250 | 50  | 1       | 501  | 501 | 5     | 1   | 2.65   | 20.48 | 11.24 | 0.55 | 50.97 | 79.29 | 33.33 | 9.45  |
| 250 | 51  | 1       | 511  | 511 | 6     | 1   | 3.15   | 41.75 | 17.75 | 0.43 | 48.19 | 77.94 | 34.01 | 9.36  |
| 250 | 52  | 1       | 521  | 521 | 6     | 1   | 2.95   | 30.24 | 9.66  | 0.32 | 44.65 | 73.7  | 40.92 | 7.39  |
| 250 | 53  | 1       | 531  | 531 | 6     | 1   | 3.55   | 54.22 | 16.23 | 0.3  | 51.59 | 77.58 | 36.11 | 10.05 |
| 250 | 54  | 1       | 541  | 541 | 6     | 1   | 2.45   | 30    | 14.54 | 0.49 | 50.34 | 77.66 | 35.82 | 9.35  |
| 250 | 55  | 1       | 551  | 551 | 6     | 1   | 4.1    | 84.33 | 34.46 | 0.41 | 51.43 | 79.91 | 33.78 | 9.9   |
| 250 | 56  | 1       | 561  | 561 | 6     | 1   | 4.15   | 28.67 | 9.42  | 0.33 | 50.91 | 79.15 | 34.8  | 10.34 |
| 250 | 57  | 1       | 571  | 571 | 6     | 1   | 3.05   | 35.83 | 17.86 | 0.5  | 48.51 | 77.3  | 36.72 | 9.07  |
| 250 | 58  | 1       | 581  | 581 | 6     | 1   | 3.05   | 28.15 | 13.06 | 0.46 | 49.02 | 78.51 | 35.68 | 9.14  |
| 250 | 59  | 1       | 591  | 591 | 6     | 1   | 3.55   | 36.11 | 15.51 | 0.43 | 50.74 | 79.34 | 34.02 | 9.81  |

**Table S2** Continued.

| Cut | Gen | Cut.Rep | Plot | Int | Block | Rep | Height | GB    | DB    | DM   | ADF   | NDF   | DIG   | LIG   |
|-----|-----|---------|------|-----|-------|-----|--------|-------|-------|------|-------|-------|-------|-------|
| 250 | 60  | 1       | 601  | 601 | 6     | 1   | 3      | 38.74 | 16.73 | 0.43 | 55.27 | 81.79 | 31.22 | 10.27 |
| 250 | 61  | 1       | 611  | 611 | 7     | 1   | 2.9    | 25.93 | 10.38 | 0.4  | 49.58 | 77.84 | 36.29 | 8.94  |
| 250 | 62  | 1       | 621  | 621 | 7     | 1   | 2.65   | 28.42 | 12.95 | 0.46 | 48.29 | 77.27 | 37.93 | 8.11  |
| 250 | 63  | 1       | 631  | 631 | 7     | 1   | 2.6    | 24.91 | 9.62  | 0.39 | 47.8  | 75.41 | 39.36 | 7.69  |
| 250 | 64  | 1       | 641  | 641 | 7     | 1   | 2.25   | 19.5  | 9.55  | 0.49 | 49.21 | 77.48 | 35.95 | 8.74  |
| 250 | 65  | 1       | 651  | 651 | 7     | 1   | 2.7    | 22.33 | 8.61  | 0.39 | 48.13 | 76.06 | 36.4  | 8.67  |
| 250 | 66  | 1       | 661  | 661 | 7     | 1   | 2.55   | 17.33 | 8.87  | 0.51 | 49.67 | 78.18 | 36.17 | 8.85  |
| 250 | 67  | 1       | 671  | 671 | 7     | 1   | 3      | 30.51 | 12.7  | 0.42 | 46.89 | 77.79 | 35.86 | 9.35  |
| 250 | 68  | 1       | 681  | 681 | 7     | 1   | 2.35   | 15    | 4.86  | 0.32 | 46.61 | 75.11 | 38.12 | 8.48  |
| 250 | 69  | 1       | 691  | 691 | 7     | 1   | 2.65   | 30    | 9.63  | 0.32 | 44.94 | 73.24 | 38.52 | 8.54  |
| 250 | 70  | 1       | 701  | 701 | 7     | 1   | 2.55   | 20.67 | 9.99  | 0.48 | 50.38 | 79.27 | 35.12 | 9.3   |
| 250 | 71  | 1       | 711  | 711 | 8     | 1   | 2.5    | 27.67 | 10.12 | 0.37 | 47.7  | 75.64 | 36.53 | 8.73  |
| 250 | 72  | 1       | 721  | 721 | 8     | 1   | 2.15   | 45.33 | 17.59 | 0.39 | 48.73 | 77.09 | 38.32 | 8.36  |
| 250 | 73  | 1       | 731  | 731 | 8     | 1   | 2      | 25.4  | 10.25 | 0.4  | 44.72 | 73.21 | 41.82 | 6.76  |
| 250 | 74  | 1       | 741  | 741 | 8     | 1   | 2.3    | 25.17 | 7.64  | 0.3  | 50.08 | 76.07 | 34.14 | 10.15 |
| 250 | 75  | 1       | 751  | 751 | 8     | 1   | 2.35   | 25.83 | 12.52 | 0.49 | 49.09 | 77.99 | 35.97 | 9.16  |
| 250 | 76  | 1       | 761  | 761 | 8     | 1   | 1.85   | 21.05 | 10.46 | 0.5  | 49.36 | 75.78 | 34.35 | 10.3  |
| 250 | 77  | 1       | 771  | 771 | 8     | 1   | 2.55   | 15.56 | 4.86  | 0.31 | 47.06 | 76.53 | 34.92 | 9.32  |
| 250 | 78  | 1       | 781  | 781 | 8     | 1   | 3.55   | 25.63 | 10.91 | 0.43 | 51.29 | 78.25 | 33.28 | 10.93 |
| 250 | 79  | 1       | 791  | 791 | 8     | 1   | 2.25   | 31.17 | 15.56 | 0.5  | 48.25 | 76.55 | 35.71 | 9.29  |
| 250 | 80  | 1       | 801  | 801 | 8     | 1   | 2.4    | 29.09 | 14.45 | 0.5  | 50.32 | 78.38 | 33.83 | 9.45  |
| 250 | 81  | 1       | 811  | 811 | 9     | 1   | 2.35   | 15.87 | 8.39  | 0.53 | 50.09 | 79.65 | 33.11 | 9.9   |
| 250 | 82  | 1       | 821  | 821 | 9     | 1   | 2.6    | 31.83 | 14.35 | 0.45 | 51.09 | 80    | 34.12 | 9.46  |
| 250 | 83  | 1       | 831  | 831 | 9     | 1   | 2.65   | 11.33 | 4.99  | 0.44 | 53.89 | 80.88 | 33.1  | 10.53 |
| 250 | 84  | 1       | 841  | 841 | 9     | 1   | 2.8    | 38.17 | 16.23 | 0.43 | 48.62 | 77.43 | 36.44 | 9.31  |
| 250 | 85  | 1       | 851  | 851 | 9     | 1   | 2.6    | 27.45 | 10.94 | 0.4  | 52.68 | 81.34 | 32.28 | 10.42 |
| 250 | 86  | 1       | 861  | 861 | 9     | 1   | 3.35   | 33.43 | 12    | 0.36 | 49.78 | 77.57 | 35.03 | 10.13 |
| 250 | 87  | 1       | 871  | 871 | 9     | 1   | 2.6    | 21.18 | 6.55  | 0.31 | 48.88 | 76.11 | 37.73 | 8.77  |
| 250 | 88  | 1       | 881  | 881 | 9     | 1   | 3.4    | 39.22 | 12.89 | 0.33 | 50.56 | 77.8  | 36.28 | 9.5   |
| 250 | 89  | 1       | 891  | 891 | 9     | 1   | 2.1    | 20.17 | 8.43  | 0.42 | 45.7  | 75.2  | 42.3  | 7.22  |
| 250 | 90  | 1       | 901  | 901 | 9     | 1   | 1.75   | 11.85 | 5.21  | 0.44 | 44.35 | 74.02 | 41.02 | 6.97  |

**Table S2** Continued.

| Cut | Gen | Cut.Rep | Plot | Int  | Block | Rep | Height | GB     | DB    | DM   | ADF   | NDF   | DIG   | LIG   |
|-----|-----|---------|------|------|-------|-----|--------|--------|-------|------|-------|-------|-------|-------|
| 250 | 91  | 1       | 911  | 911  | 10    | 1   | 1.9    | 22.17  | 6.13  | 0.28 | 43.86 | 72.51 | 39.74 | 8.06  |
| 250 | 92  | 1       | 921  | 921  | 10    | 1   | 3.6    | 16.33  | 7.19  | 0.44 | 48.66 | 77.05 | 35.22 | 10.21 |
| 250 | 93  | 1       | 931  | 931  | 10    | 1   | 3.6    | 38.5   | 16.56 | 0.43 | 53.73 | 80.4  | 31.73 | 11.18 |
| 250 | 94  | 1       | 941  | 941  | 10    | 1   | 2.3    | 29.79  | 9.04  | 0.3  | 47.45 | 76.57 | 39.7  | 8.86  |
| 250 | 95  | 1       | 951  | 951  | 10    | 1   | 3.95   | 79.65  | 39.26 | 0.49 | 53.67 | 81.32 | 32.04 | 10.52 |
| 250 | 96  | 1       | 961  | 961  | 10    | 1   | 3.7    | 54.83  | 21.17 | 0.39 | 53.55 | 81.71 | 34.65 | 10.12 |
| 250 | 97  | 1       | 971  | 971  | 10    | 1   | 3.55   | 26.83  | 12.15 | 0.45 | 47.2  | 74.85 | 37.34 | 8.48  |
| 250 | 98  | 1       | 981  | 981  | 10    | 1   | 3      | 25.79  | 14.18 | 0.55 | 48.68 | 77.31 | 36.73 | 8.64  |
| 250 | 99  | 1       | 991  | 991  | 10    | 1   | 2.3    | 19.33  | 10.21 | 0.53 | 45.65 | 73.85 | 37.43 | 8.59  |
| 250 | 100 | 1       | 1001 | 1001 | 10    | 1   | 2.25   | 12.28  | 5.26  | 0.43 | 43.33 | 72.24 | 43.41 | 6.35  |
| 500 | 1   | 2       | 11   | 12   | 1     | 1   | 4      | 129.3  | 35.21 | 0.27 | 51.58 | 78.58 | 40.25 | 8.28  |
| 500 | 2   | 2       | 21   | 22   | 1     | 1   | 5.17   | 189.55 | 60.21 | 0.32 | 57.36 | 81.2  | 32.81 | 11.8  |
| 500 | 3   | 2       | 31   | 32   | 1     | 1   | 5.83   | 99.82  | 30.2  | 0.3  | 56.59 | 80.11 | 31.6  | 11.23 |
| 500 | 4   | 2       | 41   | 42   | 1     | 1   | 4.17   | 110.67 | 38.32 | 0.35 | 53.61 | 81.07 | 35.87 | 10.47 |
| 500 | 5   | 2       | 51   | 52   | 1     | 1   | 4.83   | 106.67 | 39.66 | 0.37 | 51.8  | 79.04 | 33.79 | 8.93  |
| 500 | 6   | 2       | 61   | 62   | 1     | 1   | 6      | 57.67  | 22.63 | 0.39 | 56.41 | 84.59 | 31.37 | 10.68 |
| 500 | 7   | 2       | 71   | 72   | 1     | 1   | 4.17   | 77.66  | 28.75 | 0.37 | 53.27 | 80.9  | 29.77 | 10.98 |
| 500 | 8   | 2       | 81   | 82   | 1     | 1   | 4.33   | 89     | 32.08 | 0.36 | 53.31 | 80.08 | 35.43 | 11    |
| 500 | 9   | 2       | 91   | 92   | 1     | 1   | 4.67   | 71.5   | 28.54 | 0.4  | 56.59 | 83.12 | 31.52 | 11.06 |
| 500 | 10  | 2       | 101  | 102  | 1     | 1   | 4.33   | 86.35  | 26.98 | 0.31 | 55.27 | 80.04 | 36.67 | 11.7  |
| 500 | 11  | 2       | 111  | 112  | 2     | 1   | 5.5    | 102.55 | 40.38 | 0.39 | 49.12 | 78.04 | 38.4  | 8.86  |
| 500 | 12  | 2       | 121  | 122  | 2     | 1   | 5.5    | 96.67  | 37.64 | 0.39 | 57.77 | 84.44 | 31.52 | 12.19 |
| 500 | 13  | 2       | 131  | 132  | 2     | 1   | 5.83   | 100.66 | 36.62 | 0.36 | 52.06 | 77.52 | 31.66 | 9.91  |
| 500 | 14  | 2       | 141  | 142  | 2     | 1   | 4.83   | 84.51  | 29.35 | 0.35 | 57.6  | 84.02 | 31.16 | 12.55 |
| 500 | 15  | 2       | 151  | 152  | 2     | 1   | 4      | 83.47  | 30.83 | 0.37 | 57.02 | 84.24 | 27.55 | 12.69 |
| 500 | 16  | 2       | 161  | 162  | 2     | 1   | 4.5    | 61.33  | 20.28 | 0.33 | 58.96 | 84.34 | 23.07 | 14.03 |
| 500 | 17  | 2       | 171  | 172  | 2     | 1   | 4.83   | 94.83  | 33.86 | 0.36 | 52.51 | 79.96 | 29.44 | 12.02 |
| 500 | 18  | 2       | 181  | 182  | 2     | 1   | 5.67   | 81.5   | 29.43 | 0.36 | 56.75 | 83.38 | 30.67 | 12.72 |
| 500 | 19  | 2       | 191  | 192  | 2     | 1   | 4.83   | 110    | 37.28 | 0.34 | 50.75 | 79.51 | 36.5  | 9.53  |
| 500 | 20  | 2       | 201  | 202  | 2     | 1   | 5.17   | 76.67  | 28.18 | 0.37 | 55.86 | 80.58 | 31.79 | 12.69 |
| 500 | 21  | 2       | 211  | 212  | 3     | 1   | 5.17   | 119.67 | 50.41 | 0.42 | 53.74 | 81.85 | 33.14 | 10.32 |

**Table S2** Continued.

| Cut | Gen | Cut.Rep | Plot | Int | Block | Rep | Height | GB     | DB    | DM   | ADF   | NDF   | DIG   | LIG   |
|-----|-----|---------|------|-----|-------|-----|--------|--------|-------|------|-------|-------|-------|-------|
| 500 | 22  | 2       | 221  | 222 | 3     | 1   | 5.33   | 66.83  | 27.04 | 0.41 | 56    | 82.91 | 33.56 | 11.66 |
| 500 | 23  | 2       | 231  | 232 | 3     | 1   | 4.5    | 99.35  | 34    | 0.34 | 53.59 | 81.31 | 28.82 | 11.16 |
| 500 | 24  | 2       | 241  | 242 | 3     | 1   | 4.67   | 120.63 | 37.73 | 0.31 | 51.82 | 77.96 | 36.29 | 10.41 |
| 500 | 25  | 2       | 251  | 252 | 3     | 1   | 4      | 50.81  | 19.75 | 0.39 | 55.53 | 81.49 | 26.64 | 11.42 |
| 500 | 26  | 2       | 261  | 262 | 3     | 1   | 4.83   | 93.33  | 38.4  | 0.41 | 58.3  | 82.58 | 30.33 | 12.88 |
| 500 | 27  | 2       | 271  | 272 | 3     | 1   | 4.5    | 93.33  | 37.76 | 0.41 | 56.72 | 84.63 | 28.7  | 11.15 |
| 500 | 28  | 2       | 281  | 282 | 3     | 1   | 3.83   | 34.5   | 13.05 | 0.38 | 55.07 | 79.53 | 29.86 | 11.58 |
| 500 | 29  | 2       | 291  | 292 | 3     | 1   | 4.5    | 76.95  | 32.27 | 0.42 | 51.11 | 79.37 | 34.76 | 9.54  |
| 500 | 30  | 2       | 301  | 302 | 3     | 1   | 4.33   | 64.5   | 25.89 | 0.4  | 54.92 | 82.46 | 31.47 | 11.63 |
| 500 | 31  | 2       | 311  | 312 | 4     | 1   | 4.67   | 89     | 36.97 | 0.42 | 59.99 | 84.99 | 20.51 | 13.9  |
| 500 | 32  | 2       | 321  | 322 | 4     | 1   | 4.83   | 70.83  | 28.91 | 0.41 | 58.1  | 83.85 | 24    | 13.5  |
| 500 | 33  | 2       | 331  | 332 | 4     | 1   | 4.83   | 60.83  | 25.2  | 0.41 | 56.93 | 82.61 | 22.69 | 11.95 |
| 500 | 34  | 2       | 341  | 342 | 4     | 1   | 4.5    | 59.17  | 23.34 | 0.4  | 57.4  | 83.23 | 27.19 | 12.39 |
| 500 | 35  | 2       | 351  | 352 | 4     | 1   | 4.83   | 76     | 23.68 | 0.31 | 53.26 | 80.6  | 28.24 | 11.37 |
| 500 | 36  | 2       | 361  | 362 | 4     | 1   | 5.67   | 81.5   | 27.5  | 0.34 | 57.16 | 82.16 | 27.43 | 12.66 |
| 500 | 37  | 2       | 371  | 372 | 4     | 1   | 4.67   | 93.33  | 32.97 | 0.35 | 50.82 | 75.17 | 36.53 | 8.1   |
| 500 | 38  | 2       | 381  | 382 | 4     | 1   | 5.5    | 85.14  | 33.41 | 0.39 | 54.63 | 80.97 | 28.29 | 11.25 |
| 500 | 39  | 2       | 391  | 392 | 4     | 1   | 4      | 92.08  | 35.48 | 0.39 | 49.92 | 77.45 | 29.67 | 9.59  |
| 500 | 40  | 2       | 401  | 402 | 4     | 1   | 4.17   | 93.09  | 32.6  | 0.35 | 52.24 | 79.55 | 34.06 | 10.32 |
| 500 | 41  | 2       | 411  | 412 | 5     | 1   | 5      | 108.99 | 45.6  | 0.42 | 53.26 | 80.12 | 31.98 | 9.96  |
| 500 | 42  | 2       | 421  | 422 | 5     | 1   | 4.17   | 88.67  | 28.43 | 0.32 | 53.59 | 78.74 | 35.25 | 10.99 |
| 500 | 43  | 2       | 431  | 432 | 5     | 1   | 4.5    | 39.07  | 12.69 | 0.33 | 50.97 | 78.16 | 35.57 | 9.59  |
| 500 | 44  | 2       | 441  | 442 | 5     | 1   | 4.33   | 78.7   | 32.72 | 0.42 | 58.54 | 73.26 | 27.95 | 12.1  |
| 500 | 45  | 2       | 451  | 452 | 5     | 1   | 4.33   | 70.3   | 27.84 | 0.4  | 51.33 | 76.72 | 30.32 | 9.11  |
| 500 | 46  | 2       | 461  | 462 | 5     | 1   | 3.67   | 52.73  | 19.75 | 0.38 | 52.97 | 78.84 | 31.34 | 11.68 |
| 500 | 47  | 2       | 471  | 472 | 5     | 1   | 4.83   | 94.44  | 37.97 | 0.4  | 53.49 | 80.88 | 32.18 | 10.95 |
| 500 | 48  | 2       | 481  | 482 | 5     | 1   | 4.67   | 60.74  | 19.79 | 0.33 | 54.86 | 80.76 | 29.76 | 12.65 |
| 500 | 49  | 2       | 491  | 492 | 5     | 1   | 1.7    | 22.94  | 6.54  | 0.29 | 49.05 | 79.76 | 36.47 | 8.71  |
| 500 | 50  | 2       | 501  | 502 | 5     | 1   | 4      | 73.52  | 30.62 | 0.42 | 64.01 | 88.75 | 22.04 | 15.72 |
| 500 | 51  | 2       | 511  | 512 | 6     | 1   | 3.67   | 126.56 | 46.02 | 0.36 | 51.45 | 76.98 | 32.99 | 9.37  |
| 500 | 52  | 2       | 521  | 522 | 6     | 1   | 3.5    | 48.89  | 17.46 | 0.36 | 52.64 | 78.66 | 30.91 | 10.35 |

**Table S2** Continued.

| Cut | Gen | Cut.Rep | Plot | Int | Block | Rep | Height | GB     | DB    | DM   | ADF   | NDF   | DIG   | LIG   |
|-----|-----|---------|------|-----|-------|-----|--------|--------|-------|------|-------|-------|-------|-------|
| 500 | 53  | 2       | 531  | 532 | 6     | 1   | 3.83   | 117.75 | 49.76 | 0.42 | 53.91 | 79.3  | 26.7  | 11.44 |
| 500 | 54  | 2       | 541  | 542 | 6     | 1   | 4.67   | 80     | 31.62 | 0.4  | 55.35 | 82.11 | 26.77 | 11.63 |
| 500 | 55  | 2       | 551  | 552 | 6     | 1   | 4.67   | 146    | 58.42 | 0.4  | 52.17 | 77.17 | 32.74 | 9.21  |
| 500 | 56  | 2       | 561  | 562 | 6     | 1   | 5      | 57.9   | 20.38 | 0.35 | 55.54 | 82.37 | 29    | 12.58 |
| 500 | 57  | 2       | 571  | 572 | 6     | 1   | 5.17   | 110.33 | 44.91 | 0.41 | 57.55 | 83.67 | 29.1  | 12.12 |
| 500 | 58  | 2       | 581  | 582 | 6     | 1   | 4.17   | 63.75  | 24.38 | 0.38 | 53.22 | 80.01 | 32.04 | 10.3  |
| 500 | 59  | 2       | 591  | 592 | 6     | 1   | 4.67   | 87.04  | 36.51 | 0.42 | 53.63 | 79.66 | 29.29 | 10.18 |
| 500 | 60  | 2       | 601  | 602 | 6     | 1   | 4.17   | 92.12  | 39.85 | 0.43 | 56.77 | 82.18 | 29.03 | 12.08 |
| 500 | 61  | 2       | 611  | 612 | 7     | 1   | 4.17   | 86     | 31.49 | 0.37 | 50.78 | 76.65 | 34.69 | 9.15  |
| 500 | 62  | 2       | 621  | 622 | 7     | 1   | 3.67   | 76.58  | 35.6  | 0.47 | 56.97 | 82.13 | 26.28 | 12.38 |
| 500 | 63  | 2       | 631  | 632 | 7     | 1   | 4.5    | 65.73  | 27.23 | 0.41 | 51.52 | 79.63 | 30.36 | 9.94  |
| 500 | 64  | 2       | 641  | 642 | 7     | 1   | 4.33   | 89.86  | 32.13 | 0.36 | 54.78 | 81.68 | 32.16 | 11.44 |
| 500 | 65  | 2       | 651  | 652 | 7     | 1   | 3.5    | 56.22  | 22.72 | 0.4  | 49.74 | 77.67 | 33.01 | 9.98  |
| 500 | 66  | 2       | 661  | 662 | 7     | 1   | 4.17   | 61     | 23.61 | 0.39 | 57.17 | 83.07 | 29.69 | 11.3  |
| 500 | 67  | 2       | 671  | 672 | 7     | 1   | 3.83   | 52.75  | 21.1  | 0.4  | 52.21 | 79    | 32.99 | 9.52  |
| 500 | 68  | 2       | 681  | 682 | 7     | 1   | 4.07   | 53.1   | 21.01 | 0.4  | 53.62 | 80.62 | 33.46 | 10.75 |
| 500 | 69  | 2       | 691  | 692 | 7     | 1   | 4.67   | 113.67 | 41.16 | 0.36 | 51.1  | 79.53 | 32.19 | 10.47 |
| 500 | 70  | 2       | 701  | 702 | 7     | 1   | 5.17   | 90.09  | 37.08 | 0.41 | 56.82 | 82.63 | 28.79 | 11.65 |
| 500 | 71  | 2       | 711  | 712 | 8     | 1   | 4.33   | 60.54  | 24.88 | 0.41 | 54.32 | 79.91 | 27.09 | 11.07 |
| 500 | 72  | 2       | 721  | 722 | 8     | 1   | 4.5    | 89.39  | 34.86 | 0.39 | 55.29 | 81.1  | 30.49 | 11.53 |
| 500 | 73  | 2       | 731  | 732 | 8     | 1   | 4.5    | 45.89  | 18.52 | 0.4  | 55.96 | 80.63 | 29.66 | 11.52 |
| 500 | 74  | 2       | 741  | 742 | 8     | 1   | 4.5    | 54.33  | 19.09 | 0.35 | 59.17 | 83.15 | 23.68 | 14.64 |
| 500 | 75  | 2       | 751  | 752 | 8     | 1   | 4.67   | 90.83  | 41.21 | 0.45 | 52.73 | 79.56 | 33.43 | 9.95  |
| 500 | 76  | 2       | 761  | 762 | 8     | 1   | 4.33   | 57.78  | 24.69 | 0.43 | 50.64 | 78.29 | 34.52 | 9.4   |
| 500 | 77  | 2       | 771  | 772 | 8     | 1   | 4      | 36.42  | 13.35 | 0.37 | 53.25 | 80.19 | 29.52 | 11.35 |
| 500 | 78  | 2       | 781  | 782 | 8     | 1   | 4.93   | 88.82  | 34.22 | 0.39 | 55.2  | 80.87 | 29.77 | 12.41 |
| 500 | 79  | 2       | 791  | 792 | 8     | 1   | 3.97   | 76     | 32.62 | 0.43 | 53.21 | 79.89 | 31.12 | 10.19 |
| 500 | 80  | 2       | 801  | 802 | 8     | 1   | 5.07   | 71.96  | 27.96 | 0.39 | 56.74 | 81.64 | 28.77 | 12.14 |
| 500 | 81  | 2       | 811  | 812 | 9     | 1   | 4.77   | 69     | 28.39 | 0.41 | 53.87 | 80.83 | 32.77 | 11.13 |
| 500 | 82  | 2       | 821  | 822 | 9     | 1   | 5.17   | 90.67  | 40.85 | 0.45 | 56.36 | 82.9  | 31.29 | 11.13 |
| 500 | 83  | 2       | 831  | 832 | 9     | 1   | 4.67   | 35.82  | 13.94 | 0.39 | 58.14 | 83.11 | 21.57 | 13.53 |

**Table S2** Continued.

| Cut | Gen | Cut.Rep | Plot | Int  | Block | Rep | Height | GB     | DB    | DM   | ADF   | NDF   | DIG   | LIG   |
|-----|-----|---------|------|------|-------|-----|--------|--------|-------|------|-------|-------|-------|-------|
| 500 | 84  | 2       | 841  | 842  | 9     | 1   | 4.4    | 80.17  | 32.13 | 0.4  | 55.34 | 82.17 | 29.89 | 12.36 |
| 500 | 85  | 2       | 851  | 852  | 9     | 1   | 3.83   | 61.41  | 26.2  | 0.43 | 50.9  | 79.6  | 32.78 | 9.87  |
| 500 | 86  | 2       | 861  | 862  | 9     | 1   | 5      | 96     | 34.44 | 0.36 | 58.29 | 82.47 | 25.98 | 13.77 |
| 500 | 87  | 2       | 871  | 872  | 9     | 1   | 4.5    | 53.13  | 18.79 | 0.35 | 51.69 | 77.25 | 32.86 | 10.14 |
| 500 | 88  | 2       | 881  | 882  | 9     | 1   | 4.67   | 79.82  | 28.14 | 0.35 | 56.52 | 81.63 | 28.05 | 12.28 |
| 500 | 89  | 2       | 891  | 892  | 9     | 1   | 4.17   | 75.32  | 30.84 | 0.41 | 52.17 | 79.92 | 31.3  | 9.41  |
| 500 | 90  | 2       | 901  | 902  | 9     | 1   | 3.93   | 49.01  | 19.34 | 0.4  | 57.54 | 84.51 | 30.01 | 11.55 |
| 500 | 91  | 2       | 911  | 912  | 10    | 1   | 4.5    | 55.56  | 20.63 | 0.37 | 51.62 | 77.62 | 27.66 | 11.11 |
| 500 | 92  | 2       | 921  | 922  | 10    | 1   | 5.33   | 70.99  | 21.81 | 0.31 | 54.26 | 79.29 | 28.88 | 11.17 |
| 500 | 93  | 2       | 931  | 932  | 10    | 1   | 4.73   | 92.79  | 32.16 | 0.35 | 51.86 | 78.08 | 32.55 | 10.96 |
| 500 | 94  | 2       | 941  | 942  | 10    | 1   | 4.17   | 27.65  | 9.87  | 0.36 | 49.38 | 75.9  | 37.63 | 9.66  |
| 500 | 95  | 2       | 951  | 952  | 10    | 1   | 4.33   | 161.69 | 64.19 | 0.39 | 51.51 | 78.79 | 35.49 | 9.79  |
| 500 | 96  | 2       | 961  | 962  | 10    | 1   | 4.5    | 103    | 34.43 | 0.33 | 53.35 | 79.91 | 32.02 | 10.49 |
| 500 | 97  | 2       | 971  | 972  | 10    | 1   | 4.67   | 77.5   | 27.09 | 0.35 | 56.3  | 81.32 | 27.47 | 13.85 |
| 500 | 98  | 2       | 981  | 982  | 10    | 1   | 5      | 59.44  | 24.34 | 0.41 | 52.92 | 79.58 | 30.44 | 9.99  |
| 500 | 99  | 2       | 991  | 992  | 10    | 1   | 4.17   | 76.47  | 30.91 | 0.4  | 54.58 | 81.15 | 27.85 | 13.07 |
| 500 | 100 | 2       | 1001 | 1002 | 10    | 1   | 4.17   | 49.41  | 14.79 | 0.3  | 48.45 | 74.28 | 37.3  | 8.28  |
| 815 | 1   | 3       | 11   | 13   | 1     | 1   | 3.53   | 73.63  | 30.63 | 0.42 | 51.28 | 80.53 | 39.25 | 8.93  |
| 815 | 2   | 3       | 21   | 23   | 1     | 1   | 3.97   | 127.55 | 45.92 | 0.36 | 52.18 | 80.98 | 35.59 | 10.32 |
| 815 | 3   | 3       | 31   | 33   | 1     | 1   | 3.6    | 92.57  | 29.95 | 0.32 | 51.98 | 80.71 | 35.7  | 10.36 |
| 815 | 4   | 3       | 41   | 43   | 1     | 1   | 3.27   | 82.42  | 31.54 | 0.38 | 50.19 | 80.08 | 40.8  | 9.16  |
| 815 | 5   | 3       | 51   | 53   | 1     | 1   | 3.17   | 61.71  | 21.46 | 0.35 | 52.97 | 81.98 | 41.75 | 9.36  |
| 815 | 6   | 3       | 61   | 63   | 1     | 1   | 3.77   | 32.12  | 11.25 | 0.35 | 53.52 | 84.7  | 36.69 | 8.54  |
| 815 | 7   | 3       | 71   | 73   | 1     | 1   | 3.53   | 84.58  | 32.04 | 0.38 | 50.56 | 81.06 | 36.53 | 8.87  |
| 815 | 8   | 3       | 81   | 83   | 1     | 1   | 3.17   | 28.19  | 11.69 | 0.41 | 53.13 | 81.58 | 33.38 | 10.65 |
| 815 | 9   | 3       | 91   | 93   | 1     | 1   | 3.1    | 75.96  | 31.9  | 0.42 | 54.23 | 83.64 | 33.34 | 11.09 |
| 815 | 10  | 3       | 101  | 103  | 1     | 1   | 3.23   | 75.11  | 23.37 | 0.31 | 51.02 | 77.55 | 40.3  | 9.74  |
| 815 | 11  | 3       | 111  | 113  | 2     | 1   | 3.43   | 81.03  | 21.14 | 0.26 | 54.16 | 82.35 | 42.26 | 8.46  |
| 815 | 12  | 3       | 121  | 123  | 2     | 1   | 3.3    | 56.99  | 20.36 | 0.36 | 50.96 | 81.34 | 38.28 | 9.51  |
| 815 | 13  | 3       | 131  | 133  | 2     | 1   | 4.17   | 53.74  | 14.72 | 0.27 | 51.31 | 78.83 | 38.27 | 8.78  |
| 815 | 14  | 3       | 141  | 143  | 2     | 1   | 3.03   | 48.95  | 14.98 | 0.31 | 48.58 | 78.24 | 41.88 | 8.34  |

**Table S2** Continued.

| Cut | Gen | Cut.Rep | Plot | Int | Block | Rep | Height | GB     | DB    | DM   | ADF   | NDF   | DIG   | LIG   |
|-----|-----|---------|------|-----|-------|-----|--------|--------|-------|------|-------|-------|-------|-------|
| 815 | 15  | 3       | 151  | 153 | 2     | 1   | 3.37   | 42.92  | 14.81 | 0.34 | 49.89 | 78.56 | 35.98 | 9.8   |
| 815 | 16  | 3       | 161  | 163 | 2     | 1   | 3.7    | 48.38  | 15.27 | 0.32 | 51.11 | 79.9  | 34.23 | 10.34 |
| 815 | 17  | 3       | 171  | 173 | 2     | 1   | 3.87   | 55.56  | 15.54 | 0.28 | 51.42 | 79.31 | 29.97 | 10.14 |
| 815 | 18  | 3       | 181  | 183 | 2     | 1   | 3.57   | 99.8   | 31.43 | 0.31 | 53.42 | 81.77 | 34.34 | 9.52  |
| 815 | 19  | 3       | 191  | 193 | 2     | 1   | 3.47   | 89.71  | 26.3  | 0.29 | 52.29 | 78.89 | 34.23 | 9.32  |
| 815 | 20  | 3       | 201  | 203 | 2     | 1   | 3.43   | 49.26  | 14.57 | 0.3  | 52.68 | 79.81 | 36.51 | 9.03  |
| 815 | 21  | 3       | 211  | 213 | 3     | 1   | 3.83   | 110.48 | 32.88 | 0.3  | 51.12 | 80.55 | 41.22 | 8.46  |
| 815 | 22  | 3       | 221  | 223 | 3     | 1   | 3.9    | 73.57  | 24.01 | 0.33 | 53.25 | 82.02 | 33.07 | 9.74  |
| 815 | 23  | 3       | 231  | 233 | 3     | 1   | 3.6    | 48.89  | 14.13 | 0.29 | 52.19 | 79.26 | 32.72 | 10.71 |
| 815 | 24  | 3       | 241  | 243 | 3     | 1   | 3.5    | 77.33  | 23.75 | 0.31 | 48.8  | 77.78 | 34.37 | 8.82  |
| 815 | 25  | 3       | 251  | 253 | 3     | 1   | 3.33   | 36.76  | 13.05 | 0.35 | 53.28 | 81    | 27.98 | 10.59 |
| 815 | 26  | 3       | 261  | 263 | 3     | 1   | 3.27   | 59.05  | 20.51 | 0.35 | 51.07 | 79.22 | 35.85 | 9.36  |
| 815 | 27  | 3       | 271  | 273 | 3     | 1   | 3.17   | 55.81  | 22.02 | 0.39 | 50.56 | 78.28 | 35.3  | 9.01  |
| 815 | 28  | 3       | 281  | 283 | 3     | 1   | 3.07   | 27.88  | 10.23 | 0.37 | 49.71 | 78.5  | 35.48 | 8.77  |
| 815 | 29  | 3       | 291  | 293 | 3     | 1   | 3.37   | 70.86  | 24.25 | 0.34 | 49.19 | 78.3  | 39.24 | 8.49  |
| 815 | 30  | 3       | 301  | 303 | 3     | 1   | 3.37   | 24.57  | 8.73  | 0.36 | 50.74 | 78.63 | 35.06 | 9.34  |
| 815 | 31  | 3       | 311  | 313 | 4     | 1   | 3.03   | 55     | 17.09 | 0.31 | 51.38 | 78.08 | 36.22 | 9.85  |
| 815 | 32  | 3       | 321  | 323 | 4     | 1   | 3.63   | 57.14  | 12.71 | 0.22 | 51.61 | 78.31 | 29.58 | 10.1  |
| 815 | 33  | 3       | 331  | 333 | 4     | 1   | 3.63   | 63.05  | 23.44 | 0.37 | 48.66 | 76.2  | 34.21 | 9.16  |
| 815 | 34  | 3       | 341  | 343 | 4     | 1   | 3.23   | 30.1   | 10.19 | 0.34 | 48.89 | 77.7  | 36.41 | 8.13  |
| 815 | 35  | 3       | 351  | 353 | 4     | 1   | 3.7    | 36.36  | 10.46 | 0.29 | 53.57 | 80.21 | 30.34 | 10.78 |
| 815 | 36  | 3       | 361  | 363 | 4     | 1   | 4.07   | 68.95  | 19.45 | 0.28 | 49.68 | 77.29 | 35.13 | 8.63  |
| 815 | 37  | 3       | 371  | 373 | 4     | 1   | 3.4    | 65.33  | 19.02 | 0.29 | 48.78 | 77.32 | 40.96 | 8.21  |
| 815 | 38  | 3       | 381  | 383 | 4     | 1   | 3.4    | 52.9   | 17.72 | 0.34 | 51.32 | 79.75 | 34.2  | 9.18  |
| 815 | 39  | 3       | 391  | 393 | 4     | 1   | 3.43   | 46.21  | 17.73 | 0.38 | 51.87 | 81.45 | 32.39 | 9.8   |
| 815 | 40  | 3       | 401  | 403 | 4     | 1   | 3.58   | 68.41  | 19.41 | 0.28 | 46.74 | 76.9  | 48.81 | 7.38  |
| 815 | 41  | 3       | 411  | 413 | 5     | 1   | 3.4    | 74.67  | 25.83 | 0.35 | 52.47 | 80.87 | 34.32 | 9.93  |
| 815 | 42  | 3       | 421  | 423 | 5     | 1   | 3.33   | 56.53  | 21.55 | 0.38 | 47.65 | 78.36 | 37.65 | 8.5   |
| 815 | 43  | 3       | 431  | 433 | 5     | 1   | 3.17   | 52.11  | 19.45 | 0.37 | 48.58 | 77.06 | 36.62 | 8.28  |
| 815 | 44  | 3       | 441  | 443 | 5     | 1   | 3.43   | 108.23 | 41.69 | 0.39 | 51.02 | 80.41 | 36.59 | 9.42  |
| 815 | 45  | 3       | 451  | 453 | 5     | 1   | 3.3    | 51.83  | 19.28 | 0.37 | 50.21 | 78.55 | 36.62 | 9.39  |



**Table S2** Continued.

| Cut | Gen | Cut.Rep | Plot | Int | Block | Rep | Height | GB     | DB    | DM   | ADF   | NDF   | DIG   | LIG  |
|-----|-----|---------|------|-----|-------|-----|--------|--------|-------|------|-------|-------|-------|------|
| 815 | 46  | 3       | 461  | 463 | 5     | 1   | 3.53   | 41.08  | 14.53 | 0.35 | 51.04 | 79.31 | 33.72 | 8.64 |
| 815 | 47  | 3       | 471  | 473 | 5     | 1   | 3.4    | 86.26  | 30.47 | 0.35 | 49.5  | 78.58 | 34.75 | 8.6  |
| 815 | 48  | 3       | 481  | 483 | 5     | 1   | 4.03   | 58.53  | 16.48 | 0.28 | 46.15 | 74.54 | 36.22 | 7.9  |
| 815 | 49  | 3       | 491  | 493 | 5     | 1   | 1.77   | 21.96  | 5.87  | 0.27 | 45.07 | 75.21 | 41.85 | 6.74 |
| 815 | 50  | 3       | 501  | 503 | 5     | 1   | 3.37   | 77.39  | 27.56 | 0.36 | 52.97 | 78.47 | 32.41 | 9.24 |
| 815 | 51  | 3       | 511  | 513 | 6     | 1   | 3.4    | 102    | 32.06 | 0.31 | 44.91 | 73.96 | 41.51 | 6.88 |
| 815 | 52  | 3       | 521  | 523 | 6     | 1   | 3.1    | 55.21  | 18.22 | 0.33 | 45.75 | 74.64 | 37.75 | 8.09 |
| 815 | 53  | 3       | 531  | 533 | 6     | 1   | 3.57   | 62.86  | 22.32 | 0.36 | 50.02 | 78.32 | 36.32 | 9.17 |
| 815 | 54  | 3       | 541  | 543 | 6     | 1   | 3.17   | 62.14  | 23.98 | 0.39 | 48.55 | 78.08 | 35.49 | 8.47 |
| 815 | 55  | 3       | 551  | 553 | 6     | 1   | 3.53   | 72     | 26.39 | 0.37 | 51.95 | 78.57 | 66.66 | 8.85 |
| 815 | 56  | 3       | 561  | 563 | 6     | 1   | 3.33   | 27.59  | 8.52  | 0.31 | 48.47 | 76.89 | 36.79 | 9.17 |
| 815 | 57  | 3       | 571  | 573 | 6     | 1   | 3.43   | 60.38  | 21.5  | 0.36 | 50.27 | 78.54 | 42.88 | 8.5  |
| 815 | 58  | 3       | 581  | 583 | 6     | 1   | 3.3    | 36.22  | 12.5  | 0.35 | 46.18 | 74.46 | 45.07 | 7.05 |
| 815 | 59  | 3       | 591  | 593 | 6     | 1   | 3.4    | 57.63  | 21.98 | 0.38 | 49.29 | 78.65 | 35.75 | 8.88 |
| 815 | 60  | 3       | 601  | 603 | 6     | 1   | 3.47   | 49.58  | 18.32 | 0.37 | 47.12 | 76.79 | 41.49 | 8.37 |
| 815 | 61  | 3       | 611  | 613 | 7     | 1   | 3.5    | 49.03  | 16.12 | 0.33 | 47.91 | 76.29 | 40.49 | 7.88 |
| 815 | 62  | 3       | 621  | 623 | 7     | 1   | 3.23   | 52.32  | 21.69 | 0.41 | 50.01 | 78.64 | 30.4  | 8.57 |
| 815 | 63  | 3       | 631  | 633 | 7     | 1   | 3.43   | 56     | 20.39 | 0.36 | 48.42 | 76.68 | 44.7  | 8.12 |
| 815 | 64  | 3       | 641  | 643 | 7     | 1   | 3.37   | 46.67  | 15.11 | 0.32 | 45.38 | 73.48 | 44.32 | 6.96 |
| 815 | 65  | 3       | 651  | 653 | 7     | 1   | 3.2    | 38.33  | 12.28 | 0.32 | 47.29 | 75.73 | 42.03 | 8.37 |
| 815 | 66  | 3       | 661  | 663 | 7     | 1   | 3.4    | 54.48  | 20.89 | 0.38 | 47.92 | 77.05 | 39.47 | 8.42 |
| 815 | 67  | 3       | 671  | 673 | 7     | 1   | 3.2    | 52.1   | 19.64 | 0.38 | 51.11 | 81.1  | 35.7  | 9.32 |
| 815 | 68  | 3       | 681  | 683 | 7     | 1   | 3.53   | 39.13  | 12.69 | 0.32 | 48.66 | 77.04 | 35.89 | 9.92 |
| 815 | 69  | 3       | 691  | 693 | 7     | 1   | 3.5    | 42.86  | 13.42 | 0.31 | 49.22 | 77.27 | 36.16 | 9.63 |
| 815 | 70  | 3       | 701  | 703 | 7     | 1   | 3.7    | 92     | 33.63 | 0.37 | 51.33 | 79.35 | 35.78 | 9.22 |
| 815 | 71  | 3       | 711  | 713 | 8     | 1   | 2.97   | 29.52  | 9.89  | 0.34 | 51.45 | 79.84 | 35.57 | 9.97 |
| 815 | 72  | 3       | 721  | 723 | 8     | 1   | 3.33   | 90.29  | 34.37 | 0.38 | 52.23 | 79.79 | 37.17 | 8.77 |
| 815 | 73  | 3       | 731  | 733 | 8     | 1   | 3.23   | 105.03 | 37.36 | 0.36 | 46.89 | 75.81 | 42.92 | 8.09 |
| 815 | 74  | 3       | 741  | 743 | 8     | 1   | 3.93   | 30.86  | 9.47  | 0.31 | 48.1  | 74.73 | 40.98 | 8.79 |
| 815 | 75  | 3       | 751  | 753 | 8     | 1   | 3.4    | 92.19  | 32.46 | 0.35 | 50.51 | 78.68 | 36.68 | 9.09 |
| 815 | 76  | 3       | 761  | 763 | 8     | 1   | 3.6    | 50.42  | 17.67 | 0.35 | 47.47 | 77.01 | 38.53 | 7.74 |

**Table S2** Continued.

| Cut  | Gen | Cut.Rep | Plot | Int  | Block | Rep | Height | GB     | DB    | DM   | ADF   | NDF   | DIG   | LIG   |
|------|-----|---------|------|------|-------|-----|--------|--------|-------|------|-------|-------|-------|-------|
| 815  | 77  | 3       | 771  | 773  | 8     | 1   | 3.43   | 26.45  | 9.65  | 0.37 | 46.75 | 75.09 | 36.7  | 8.62  |
| 815  | 78  | 3       | 781  | 783  | 8     | 1   | 3.3    | 68     | 21.7  | 0.32 | 48.51 | 76.14 | 36.21 | 8.96  |
| 815  | 79  | 3       | 791  | 793  | 8     | 1   | 3.1    | 41.14  | 14.99 | 0.36 | 48.3  | 77.94 | 37.26 | 8.66  |
| 815  | 80  | 3       | 801  | 803  | 8     | 1   | 3.23   | 73.74  | 26.86 | 0.36 | 47.83 | 75.43 | 37.8  | 8.36  |
| 815  | 81  | 3       | 811  | 813  | 9     | 1   | 3.23   | 36.46  | 13.87 | 0.38 | 49.71 | 77.93 | 32.82 | 9.07  |
| 815  | 82  | 3       | 821  | 823  | 9     | 1   | 3.37   | 73.52  | 27.11 | 0.37 | 47.41 | 77.13 | 37.91 | 7.28  |
| 815  | 83  | 3       | 831  | 833  | 9     | 1   | 3.43   | 57.24  | 21.31 | 0.37 | 51.93 | 80.89 | 31.08 | 9.93  |
| 815  | 84  | 3       | 841  | 843  | 9     | 1   | 3.37   | 62.36  | 24.26 | 0.39 | 51.33 | 80.1  | 31.22 | 9.44  |
| 815  | 85  | 3       | 851  | 853  | 9     | 1   | 3.2    | 50.32  | 19.62 | 0.39 | 53.08 | 81.05 | 31.41 | 9.61  |
| 815  | 86  | 3       | 861  | 863  | 9     | 1   | 3.6    | 80     | 23.51 | 0.29 | 49.47 | 78.61 | 35.97 | 8.62  |
| 815  | 87  | 3       | 871  | 873  | 9     | 1   | 3.57   | 53.82  | 17.66 | 0.33 | 51.21 | 78.34 | 32.1  | 9.74  |
| 815  | 88  | 3       | 881  | 883  | 9     | 1   | 3.43   | 58.79  | 17.76 | 0.3  | 48.28 | 75.72 | 35.23 | 8.46  |
| 815  | 89  | 3       | 891  | 893  | 9     | 1   | 3.1    | 53.96  | 20.97 | 0.39 | 49.91 | 77.25 | 33.72 | 8.44  |
| 815  | 90  | 3       | 901  | 903  | 9     | 1   | 3      | 29.9   | 11.75 | 0.39 | 48.93 | 77.53 | 37.55 | 8.57  |
| 815  | 91  | 3       | 911  | 913  | 10    | 1   | 3.73   | 28.19  | 9.13  | 0.32 | 52.01 | 78.99 | 32.09 | 10.48 |
| 815  | 92  | 3       | 921  | 923  | 10    | 1   | 4.03   | 44.24  | 13.34 | 0.3  | 44.73 | 73.46 | 42.25 | 7.15  |
| 815  | 93  | 3       | 931  | 933  | 10    | 1   | 3.43   | 60.23  | 20.48 | 0.34 | 47.64 | 74.93 | 39.35 | 7.74  |
| 815  | 94  | 3       | 941  | 943  | 10    | 1   | 3.4    | 30.56  | 10.39 | 0.34 | 46.52 | 75.48 | 40.16 | 8.67  |
| 815  | 95  | 3       | 951  | 953  | 10    | 1   | 3.9    | 119.81 | 36.4  | 0.3  | 50.37 | 79.51 | 37.92 | 8.91  |
| 815  | 96  | 3       | 961  | 963  | 10    | 1   | 3.63   | 89.25  | 30.25 | 0.34 | 50.44 | 79.33 | 41.81 | 8.85  |
| 815  | 97  | 3       | 971  | 973  | 10    | 1   | 3.77   | 62.67  | 19.44 | 0.31 | 46.43 | 74.31 | 42.41 | 8.42  |
| 815  | 98  | 3       | 981  | 983  | 10    | 1   | 3.17   | 49.07  | 18.15 | 0.37 | 49    | 77.94 | 39.93 | 8.53  |
| 815  | 99  | 3       | 991  | 993  | 10    | 1   | 2.9    | 24.76  | 7.72  | 0.31 | 45.82 | 75.44 | 44.82 | 7.56  |
| 815  | 100 | 3       | 1001 | 1003 | 10    | 1   | 3.17   | 24.26  | 7     | 0.29 | 45.02 | 72.88 | 43.38 | 6.28  |
| 1405 | 1   | 4       | 11   | 14   | 1     | 1   | 2.6    | 75     | 23.18 | 0.31 | 49.03 | 77.89 | 41.69 | 8.16  |
| 1405 | 2   | 4       | 21   | 24   | 1     | 1   | 2.8    | 112    | 34.09 | 0.3  | 46.94 | 79.26 | 40.82 | 8.9   |
| 1405 | 3   | 4       | 31   | 34   | 1     | 1   | 2.7    | 84.89  | 27.14 | 0.32 | 52    | 79.99 | 36.89 | 10.55 |
| 1405 | 4   | 4       | 41   | 44   | 1     | 1   | 2.6    | 71.11  | 17.24 | 0.24 | 52.23 | 81.94 | 41    | 9.32  |
| 1405 | 5   | 4       | 51   | 54   | 1     | 1   | 2.7    | 49.33  | 19.04 | 0.39 | 45.99 | 78.96 | 43.79 | 7.46  |
| 1405 | 6   | 4       | 61   | 64   | 1     | 1   | 2.5    | 18.22  | 3.31  | 0.18 | 50.65 | 81.45 | 43.9  | 8.18  |
| 1405 | 7   | 4       | 71   | 74   | 1     | 1   | 2.4    | 56.44  | 21.83 | 0.39 | 52.07 | 81.13 | 33.72 | 9.49  |

**Table S2** Continued.

| Cut  | Gen | Cut.Rep | Plot | Int | Block | Rep | Height | GB    | DB    | DM   | ADF   | NDF   | DIG   | LIG   |
|------|-----|---------|------|-----|-------|-----|--------|-------|-------|------|-------|-------|-------|-------|
| 1405 | 8   | 4       | 81   | 84  | 1     | 1   | 2.3    | 15.11 | 5.65  | 0.37 | 47.38 | 79.41 | 40.5  | 8.43  |
| 1405 | 9   | 4       | 91   | 94  | 1     | 1   | 2.4    | 25.78 | 9.52  | 0.37 | 46.78 | 78.26 | 42.04 | 7.68  |
| 1405 | 10  | 4       | 101  | 104 | 1     | 1   | 2.6    | 44.89 | 13.61 | 0.3  | 47.79 | 76.63 | 41.12 | 8.02  |
| 1405 | 11  | 4       | 111  | 114 | 2     | 1   | 2.7    | 67.11 | 25    | 0.37 | 48.29 | 79.23 | 39.3  | 8.82  |
| 1405 | 12  | 4       | 121  | 124 | 2     | 1   | 2.5    | 56.89 | 22.2  | 0.39 | 50.02 | 81.95 | 39.43 | 8.86  |
| 1405 | 13  | 4       | 131  | 134 | 2     | 1   | 2.8    | 39.56 | 16.38 | 0.41 | 52.07 | 81.65 | 33.91 | 10.4  |
| 1405 | 14  | 4       | 141  | 144 | 2     | 1   | 2.6    | 30.44 | 12.98 | 0.43 | 49    | 78.76 | 38.83 | 8.81  |
| 1405 | 15  | 4       | 151  | 154 | 2     | 1   | 2.9    | 35.56 | 9.32  | 0.26 | 48.48 | 77.89 | 44.03 | 8.02  |
| 1405 | 16  | 4       | 161  | 164 | 2     | 1   | 2.5    | 53.11 | 13.63 | 0.26 | 48.12 | 76.71 | 40.24 | 9.26  |
| 1405 | 17  | 4       | 171  | 174 | 2     | 1   | 2.6    | 48.44 | 12.67 | 0.26 | 49.74 | 77.51 | 40.55 | 9.24  |
| 1405 | 18  | 4       | 181  | 184 | 2     | 1   | 2.8    | 86.22 | 25.93 | 0.3  | 48.38 | 77.33 | 37.08 | 9.78  |
| 1405 | 19  | 4       | 191  | 194 | 2     | 1   | 2.5    | 58.22 | 19.58 | 0.34 | 47.08 | 76.15 | 41.56 | 8.31  |
| 1405 | 20  | 4       | 201  | 204 | 2     | 1   | 2.4    | 38.67 | 12.76 | 0.33 | 45.65 | 74.13 | 41.33 | 8.47  |
| 1405 | 21  | 4       | 211  | 214 | 3     | 1   | 3      | 87.56 | 33.66 | 0.38 | 51.58 | 79.79 | 37.05 | 10.34 |
| 1405 | 22  | 4       | 221  | 224 | 3     | 1   | 2.9    | 40.44 | 16.29 | 0.4  | 51.61 | 80.9  | 36.84 | 10.18 |
| 1405 | 23  | 4       | 231  | 234 | 3     | 1   | 2.2    | 36    | 10.24 | 0.28 | 51.09 | 76.71 | 37    | 9.6   |
| 1405 | 24  | 4       | 241  | 244 | 3     | 1   | 2.5    | 41.33 | 15.44 | 0.37 | 49.3  | 78.99 | 39.27 | 9.48  |
| 1405 | 25  | 4       | 251  | 254 | 3     | 1   | 2.5    | 31.78 | 13.18 | 0.41 | 52.86 | 81.77 | 34.34 | 11.58 |
| 1405 | 26  | 4       | 261  | 264 | 3     | 1   | 2.4    | 71.11 | 22.66 | 0.32 | 49.71 | 80.6  | 36.42 | 9.69  |
| 1405 | 27  | 4       | 271  | 274 | 3     | 1   | 2.5    | 64    | 26.08 | 0.41 | 47.04 | 78.62 | 39.01 | 8.4   |
| 1405 | 28  | 4       | 281  | 284 | 3     | 1   | 2.4    | 10.22 | 3.53  | 0.34 | 47.86 | 77.46 | 40.9  | 8.14  |
| 1405 | 29  | 4       | 291  | 294 | 3     | 1   | 2.9    | 68.44 | 25.69 | 0.38 | 46.82 | 76.04 | 40.15 | 8     |
| 1405 | 30  | 4       | 301  | 304 | 3     | 1   | 2.3    | 11.11 | 4.42  | 0.4  | 49.49 | 76.78 | 38.74 | 9.05  |
| 1405 | 31  | 4       | 311  | 314 | 4     | 1   | 2.6    | 40.44 | 13.64 | 0.34 | 49.03 | 77.11 | 37.15 | 9.08  |
| 1405 | 32  | 4       | 321  | 324 | 4     | 1   | 2.8    | 45.11 | 15.1  | 0.33 | 49    | 77.5  | 38.38 | 8.71  |
| 1405 | 33  | 4       | 331  | 334 | 4     | 1   | 2.6    | 68.89 | 23.28 | 0.34 | 47    | 74.83 | 39.57 | 8.88  |
| 1405 | 34  | 4       | 341  | 344 | 4     | 1   | 2.4    | 20.89 | 8.01  | 0.38 | 47.27 | 77.51 | 40.17 | 8.65  |
| 1405 | 35  | 4       | 351  | 354 | 4     | 1   | 2.3    | 21.11 | 6.02  | 0.28 | 47.65 | 77.28 | 38.78 | 8.86  |
| 1405 | 36  | 4       | 361  | 364 | 4     | 1   | 2.7    | 53.33 | 14.42 | 0.27 | 48.13 | 77.85 | 41.05 | 8.26  |
| 1405 | 37  | 4       | 371  | 374 | 4     | 1   | 2.2    | 36.89 | 13.61 | 0.37 | 44.3  | 77.02 | 43.71 | 6.5   |
| 1405 | 38  | 4       | 381  | 384 | 4     | 1   | 2.6    | 36    | 15.15 | 0.42 | 45.67 | 75.65 | 38.65 | 8.26  |

**Table S2** Continued.

| Cut  | Gen | Cut.Rep | Plot | Int | Block | Rep | Height | GB     | DB    | DM   | ADF   | NDF   | DIG   | LIG   |
|------|-----|---------|------|-----|-------|-----|--------|--------|-------|------|-------|-------|-------|-------|
| 1405 | 39  | 4       | 391  | 394 | 4     | 1   | 2.4    | 23.56  | 8.24  | 0.35 | 50.18 | 80.19 | 38.68 | 9.48  |
| 1405 | 40  | 4       | 401  | 404 | 4     | 1   | 2.5    | 68     | 24.51 | 0.36 | 48.42 | 79.71 | 40.34 | 8.92  |
| 1405 | 41  | 4       | 411  | 414 | 5     | 1   | 2.6    | 58.89  | 24.4  | 0.41 | 49.98 | 79.78 | 38.04 | 9.9   |
| 1405 | 42  | 4       | 421  | 424 | 5     | 1   | 3      | 77.11  | 20.86 | 0.27 | 48.7  | 80.2  | 40.82 | 9.58  |
| 1405 | 43  | 4       | 431  | 434 | 5     | 1   | 2.5    | 70.89  | 28.28 | 0.4  | 49.11 | 77.99 | 39.32 | 9.56  |
| 1405 | 44  | 4       | 441  | 444 | 5     | 1   | 2.8    | 103.55 | 40.04 | 0.39 | 48.91 | 81.32 | 41.54 | 8.86  |
| 1405 | 45  | 4       | 451  | 454 | 5     | 1   | 2.7    | 39.78  | 13.64 | 0.34 | 50.12 | 79.63 | 38.8  | 9.28  |
| 1405 | 46  | 4       | 461  | 464 | 5     | 1   | 2.4    | 20     | 7.2   | 0.36 | 50.86 | 82.41 | 37.6  | 10.02 |
| 1405 | 47  | 4       | 471  | 474 | 5     | 1   | 2.7    | 79.11  | 36.59 | 0.37 | 47.73 | 78.87 | 40.79 | 8.82  |
| 1405 | 48  | 4       | 481  | 484 | 5     | 1   | 3      | 27.56  | 6.36  | 0.23 | 50.53 | 78.97 | 41.17 | 8.83  |
| 1405 | 49  | 4       | 491  | 494 | 5     | 1   | NA     | NA     | NA    | 0.35 | 49.35 | 76.97 | 37.85 | 9.22  |
| 1405 | 50  | 4       | 501  | 504 | 5     | 1   | 2.6    | 47.33  | 17.1  | 0.36 | 48.6  | 77.35 | 39.35 | 8.9   |
| 1405 | 51  | 4       | 511  | 514 | 6     | 1   | 2.9    | 70     | 16.22 | 0.38 | 49.58 | 79.38 | 39.6  | 8.88  |
| 1405 | 52  | 4       | 521  | 524 | 6     | 1   | 2.4    | 24.44  | 8.24  | 0.34 | 47.41 | 78.31 | 40.88 | 8.83  |
| 1405 | 53  | 4       | 531  | 534 | 6     | 1   | 2.3    | 54.89  | 20.05 | 0.37 | 48.26 | 78.74 | 38.77 | 8.87  |
| 1405 | 54  | 4       | 541  | 544 | 6     | 1   | 3      | 36     | 15.28 | 0.42 | 46.78 | 78.78 | 40.07 | 8.57  |
| 1405 | 55  | 4       | 551  | 554 | 6     | 1   | 2.7    | 48.67  | 17.47 | 0.36 | 48.67 | 78.45 | 39.01 | 8.8   |
| 1405 | 56  | 4       | 561  | 564 | 6     | 1   | 2.3    | 10     | 3.58  | 0.36 | 46.69 | 76.98 | 39.63 | 8.57  |
| 1405 | 57  | 4       | 571  | 574 | 6     | 1   | 2.4    | 44.44  | 17.58 | 0.4  | 47.17 | 77.1  | 38.94 | 8.77  |
| 1405 | 58  | 4       | 581  | 584 | 6     | 1   | 2.7    | 38     | 13.55 | 0.36 | 45.61 | 76.33 | 42.04 | 7.64  |
| 1405 | 59  | 4       | 591  | 594 | 6     | 1   | 2.9    | 33.33  | 11.33 | 0.34 | 50.22 | 80.3  | 39.78 | 9.2   |
| 1405 | 60  | 4       | 601  | 604 | 6     | 1   | 2.7    | 27.78  | 10.5  | 0.38 | NA    | NA    | NA    | NA    |
| 1405 | 61  | 4       | 611  | 614 | 7     | 1   | 3.3    | 53.33  | 17.29 | 0.32 | 46.42 | 77.74 | 41.45 | 7.7   |
| 1405 | 62  | 4       | 621  | 624 | 7     | 1   | 2.4    | 42.22  | 11.33 | 0.27 | 46.81 | 77.94 | 42.55 | 8.85  |
| 1405 | 63  | 4       | 631  | 634 | 7     | 1   | 2.7    | 46.44  | 18.4  | 0.4  | 45.56 | 74.86 | 40.92 | 7.67  |
| 1405 | 64  | 4       | 641  | 644 | 7     | 1   | 2.3    | 28.89  | 10.86 | 0.38 | 45.81 | 73.8  | 42.18 | 7.22  |
| 1405 | 65  | 4       | 651  | 654 | 7     | 1   | 2.4    | 33.33  | 10.51 | 0.32 | 47.07 | 77.34 | 40.49 | 8.65  |
| 1405 | 66  | 4       | 661  | 664 | 7     | 1   | 2.4    | 37.78  | 14.36 | 0.38 | 45.65 | 79.32 | 41.73 | 8.5   |
| 1405 | 67  | 4       | 671  | 674 | 7     | 1   | 2.6    | 25.78  | 7.1   | 0.28 | 51.3  | 79.38 | 37.86 | 9.94  |
| 1405 | 68  | 4       | 681  | 684 | 7     | 1   | 2.8    | 36.67  | 14.26 | 0.39 | 44.1  | 76.28 | 46.87 | 7.19  |
| 1405 | 69  | 4       | 691  | 694 | 7     | 1   | 2.1    | 30.67  | 8.81  | 0.29 | 46.49 | 77.42 | 42.15 | 8.69  |

**Table S2** Continued.

| Cut  | Gen | Cut.Rep | Plot | Int  | Block | Rep | Height | GB     | DB    | DM   | ADF   | NDF   | DIG   | LIG   |
|------|-----|---------|------|------|-------|-----|--------|--------|-------|------|-------|-------|-------|-------|
| 1405 | 70  | 4       | 701  | 704  | 7     | 1   | 2.8    | 76     | 30.81 | 0.41 | 46.67 | 79.4  | 40.74 | 7.83  |
| 1405 | 71  | 4       | 711  | 714  | 8     | 1   | 2.3    | 25.78  | 9.27  | 0.36 | 50.77 | 81.32 | 38.82 | 8.92  |
| 1405 | 72  | 4       | 721  | 724  | 8     | 1   | 3      | 108.89 | 36.87 | 0.34 | 48.06 | 78.2  | 46.12 | 7.33  |
| 1405 | 73  | 4       | 731  | 734  | 8     | 1   | 2.8    | 76.22  | 24.8  | 0.33 | 23.52 | 58.71 | 52.46 | 6.62  |
| 1405 | 74  | 4       | 741  | 744  | 8     | 1   | 2.5    | 6.67   | 1.91  | 0.29 | 50.72 | 77.79 | 37.43 | 9.94  |
| 1405 | 75  | 4       | 751  | 754  | 8     | 1   | 2.8    | 73.78  | 30.17 | 0.41 | 47.67 | 79.76 | 39.28 | 8.91  |
| 1405 | 76  | 4       | 761  | 764  | 8     | 1   | 2.2    | 44.44  | 18.35 | 0.41 | 49.15 | 79.45 | 38.95 | 9.2   |
| 1405 | 77  | 4       | 771  | 774  | 8     | 1   | 1.8    | 6.67   | 2.37  | 0.36 | 51.33 | 81.21 | 42.32 | 8.56  |
| 1405 | 78  | 4       | 781  | 784  | 8     | 1   | 2.8    | 63.78  | 20.59 | 0.32 | 49.37 | 78.74 | 38.87 | 9.25  |
| 1405 | 79  | 4       | 791  | 794  | 8     | 1   | 2.4    | 40     | 13.79 | 0.34 | 46.11 | 76.19 | 42.2  | 7.87  |
| 1405 | 80  | 4       | 801  | 804  | 8     | 1   | 2.3    | 38.22  | 15.23 | 0.4  | 47.52 | 77.7  | 38.91 | 8.73  |
| 1405 | 81  | 4       | 811  | 814  | 9     | 1   | 2.4    | 40     | 12.23 | 0.31 | 50.27 | 79.81 | 40.09 | 8.56  |
| 1405 | 82  | 4       | 821  | 824  | 9     | 1   | 2.4    | 64.89  | 24.35 | 0.38 | 49.11 | 80.35 | 42.01 | 8.31  |
| 1405 | 83  | 4       | 831  | 834  | 9     | 1   | 2.5    | 32     | 10.7  | 0.33 | 50.88 | 78.08 | 37.48 | 9.3   |
| 1405 | 84  | 4       | 841  | 844  | 9     | 1   | 2.8    | 37.33  | 14.29 | 0.38 | 48.94 | 80.31 | 39.32 | 8.77  |
| 1405 | 85  | 4       | 851  | 854  | 9     | 1   | 2.9    | 39.56  | 15.51 | 0.39 | 46.09 | 77.42 | 39.55 | 8.18  |
| 1405 | 86  | 4       | 861  | 864  | 9     | 1   | 2.8    | 52.89  | 16.37 | 0.31 | 50.15 | 77.37 | 38.03 | 9.17  |
| 1405 | 87  | 4       | 871  | 874  | 9     | 1   | 3.4    | 21.78  | 6.73  | 0.31 | 50.54 | 79.13 | 39.7  | 8.94  |
| 1405 | 88  | 4       | 881  | 884  | 9     | 1   | 3.6    | 28.44  | 9.07  | 0.32 | 54.07 | 80.11 | 36.17 | 10.11 |
| 1405 | 89  | 4       | 891  | 894  | 9     | 1   | 2.3    | 38.22  | 14.32 | 0.37 | 47.9  | 77.13 | 37.21 | 8.69  |
| 1405 | 90  | 4       | 901  | 904  | 9     | 1   | 2      | 30.22  | 12.65 | 0.42 | 45.76 | 74.24 | 38.13 | 7.05  |
| 1405 | 91  | 4       | 911  | 914  | 10    | 1   | 2.5    | 33.78  | 9.6   | 0.28 | 50.48 | 77.11 | 36.75 | 9.8   |
| 1405 | 92  | 4       | 921  | 924  | 10    | 1   | 2.8    | 34.67  | 12.24 | 0.35 | 47.25 | 75.01 | 38.21 | 8.32  |
| 1405 | 93  | 4       | 931  | 934  | 10    | 1   | 3.2    | 33.56  | 9.94  | 0.3  | 51.57 | 77.93 | 38.2  | 9.79  |
| 1405 | 94  | 4       | 941  | 944  | 10    | 1   | 3.1    | 16     | 4.99  | 0.31 | NA    | NA    | NA    | NA    |
| 1405 | 95  | 4       | 951  | 954  | 10    | 1   | 2.9    | 57.78  | 18.49 | 0.32 | 44.28 | 74.63 | 43.69 | 7.06  |
| 1405 | 96  | 4       | 961  | 964  | 10    | 1   | 2.9    | 47.56  | 19    | 0.4  | 52.79 | 80.97 | 36.38 | 9.54  |
| 1405 | 97  | 4       | 971  | 974  | 10    | 1   | 2.8    | 52.89  | 18.04 | 0.34 | 50.06 | 76.93 | 36.42 | 9.43  |
| 1405 | 98  | 4       | 981  | 984  | 10    | 1   | 2.5    | 10.67  | 4.5   | 0.42 | 47.5  | 74.55 | 41.62 | 8.18  |
| 1405 | 99  | 4       | 991  | 994  | 10    | 1   | 0      | 0      | 0     | 0    | 0     | 0     | 0     | 0     |
| 1405 | 100 | 4       | 1001 | 1004 | 10    | 1   | 0      | 0      | 0     | 0    | 43.32 | 75.85 | 45.62 | 6.47  |

**Table S2** Continued.

| Cut  | Gen | Cut.Rep | Plot | Int | Block | Rep | Height | GB      | DB     | DM    | ADF   | NDF   | DIG   | LIG   |
|------|-----|---------|------|-----|-------|-----|--------|---------|--------|-------|-------|-------|-------|-------|
| 1615 | 1   | 5       | 11   | 15  | 1     | 1   | 4      | 112.397 | 38.925 | 0.346 | 40.98 | 77.28 | 43.91 | 7.84  |
| 1615 | 2   | 5       | 21   | 25  | 1     | 1   | 4.2    | 113.645 | 40.554 | 0.357 | 44.32 | 78.15 | 37.84 | 9.1   |
| 1615 | 3   | 5       | 31   | 35  | 1     | 1   | 4.1    | 108.889 | 28.257 | 0.26  | 44.88 | 77.66 | 40.62 | 8.72  |
| 1615 | 4   | 5       | 41   | 45  | 1     | 1   | 3.8    | 76.531  | 18.951 | 0.248 | 46.42 | 78.74 | 46.98 | 7.63  |
| 1615 | 5   | 5       | 51   | 55  | 1     | 1   | 3.2    | 55.111  | 20.547 | 0.373 | 41.22 | 78.32 | 41.5  | 7.37  |
| 1615 | 6   | 5       | 61   | 65  | 1     | 1   | 4      | 20.408  | 7.172  | 0.351 | 45.68 | 81.16 | 41.52 | 7.63  |
| 1615 | 7   | 5       | 71   | 75  | 1     | 1   | 3      | 56.818  | 19.76  | 0.348 | 47.02 | 81.17 | 39.22 | 9.47  |
| 1615 | 8   | 5       | 81   | 85  | 1     | 1   | 2.8    | 33.778  | 12.426 | 0.368 | 46.92 | 79.11 | 39.87 | 8.24  |
| 1615 | 9   | 5       | 91   | 95  | 1     | 1   | 3.1    | 24.49   | 9.423  | 0.385 | 51.05 | 82.92 | 38.51 | 9.95  |
| 1615 | 10  | 5       | 101  | 105 | 1     | 1   | 3.5    | 27.2    | 9.02   | 0.332 | 46.17 | 78.01 | 40.06 | 9.64  |
| 1615 | 11  | 5       | 111  | 115 | 2     | 1   | 4.2    | 67.174  | 25.963 | 0.387 | 41.78 | 76.49 | 45.17 | 8.24  |
| 1615 | 12  | 5       | 121  | 125 | 2     | 1   | 3.4    | 64.497  | 22.465 | 0.348 | 45.24 | 79.88 | 40.18 | 9.21  |
| 1615 | 13  | 5       | 131  | 135 | 2     | 1   | 4.3    | 50.51   | 18.118 | 0.359 | 42.41 | 77.48 | 41.91 | 8.84  |
| 1615 | 14  | 5       | 141  | 145 | 2     | 1   | 3.5    | 35.111  | 11.571 | 0.33  | 46.81 | 79.48 | 38.96 | 8.92  |
| 1615 | 15  | 5       | 151  | 155 | 2     | 1   | 3.3    | 31.276  | 10.459 | 0.334 | 46.21 | 78.99 | 38.29 | 10.25 |
| 1615 | 16  | 5       | 161  | 165 | 2     | 1   | 3.4    | 55.556  | 17.934 | 0.323 | 46.32 | 78.12 | 40.83 | 9.64  |
| 1615 | 17  | 5       | 171  | 175 | 2     | 1   | 3.3    | 58.88   | 20.828 | 0.354 | 42.26 | 76.77 | 44.05 | 8.51  |
| 1615 | 18  | 5       | 181  | 185 | 2     | 1   | 4.8    | 81.837  | 29.043 | 0.355 | 41.92 | 77.08 | 42.65 | 8.87  |
| 1615 | 19  | 5       | 191  | 195 | 2     | 1   | 3.8    | 68      | 25.043 | 0.368 | 42.29 | 75.98 | 39.61 | 9     |
| 1615 | 20  | 5       | 201  | 205 | 2     | 1   | 4.6    | 49.778  | 17.173 | 0.345 | 42.01 | 75.51 | 39.65 | 9.64  |
| 1615 | 21  | 5       | 211  | 215 | 3     | 1   | 4.2    | 72      | 27.79  | 0.386 | 47.07 | 79.97 | 38.99 | 9.13  |
| 1615 | 22  | 5       | 221  | 225 | 3     | 1   | 3.8    | 64.518  | 22.657 | 0.351 | 46.68 | 78.77 | 37.79 | 8.94  |
| 1615 | 23  | 5       | 231  | 235 | 3     | 1   | 3.1    | 28.571  | 9.136  | 0.32  | 47.59 | 78.34 | 38.05 | 10.14 |
| 1615 | 24  | 5       | 241  | 245 | 3     | 1   | 3.2    | 60.444  | 21.213 | 0.351 | 42.37 | 75.01 | 43.4  | 7.93  |
| 1615 | 25  | 5       | 251  | 255 | 3     | 1   | 3      | 30      | 9.843  | 0.328 | 45.11 | 77.52 | 42.16 | 9.25  |
| 1615 | 26  | 5       | 261  | 265 | 3     | 1   | 3.8    | 60.889  | 23.081 | 0.379 | 46.58 | 79.81 | 39.4  | 9.08  |
| 1615 | 27  | 5       | 271  | 275 | 3     | 1   | 3.2    | 55.556  | 21.039 | 0.379 | 46.07 | 78.15 | 42.02 | 8.77  |
| 1615 | 28  | 5       | 281  | 285 | 3     | 1   | 3.2    | 25.51   | NA     | NA    | NA    | NA    | NA    | NA    |
| 1615 | 29  | 5       | 291  | 295 | 3     | 1   | 3.5    | 63.111  | 24.621 | 0.39  | 43.85 | 79.32 | 39.01 | 9.53  |
| 1615 | 30  | 5       | 301  | 305 | 3     | 1   | 3      | 36.222  | 14.879 | 0.411 | 47.34 | 82.53 | 34.18 | 10.54 |
| 1615 | 31  | 5       | 311  | 315 | 4     | 1   | 3.8    | 50.48   | 20.246 | 0.401 | 45.31 | 79.06 | 37.93 | 9.34  |

**Table S2** Continued.

| Cut  | Gen | Cut.Rep | Plot | Int | Block | Rep | Height | GB      | DB     | DM    | ADF   | NDF   | DIG   | LIG   |
|------|-----|---------|------|-----|-------|-----|--------|---------|--------|-------|-------|-------|-------|-------|
| 1615 | 32  | 5       | 321  | 325 | 4     | 1   | 3.6    | 45.778  | 19.575 | 0.428 | 48.17 | 82.08 | 32.49 | 11.06 |
| 1615 | 33  | 5       | 331  | 335 | 4     | 1   | 3.6    | 47.333  | 20.412 | 0.431 | 46.21 | 80.64 | 35.11 | 10.75 |
| 1615 | 34  | 5       | 341  | 345 | 4     | 1   | 3.2    | 26.667  | 11.817 | 0.443 | 47.98 | 81.71 | 34.68 | 11.53 |
| 1615 | 35  | 5       | 351  | 355 | 4     | 1   | 3.3    | 39.286  | 14.702 | 0.374 | 42.14 | 78.99 | 39.32 | 9.94  |
| 1615 | 36  | 5       | 361  | 365 | 4     | 1   | 3.5    | 69.778  | 26.515 | 0.38  | 44.86 | 78.47 | 41.5  | 8.6   |
| 1615 | 37  | 5       | 371  | 375 | 4     | 1   | 3.1    | 54.4    | 19.118 | 0.351 | 42.71 | 76.28 | 43.38 | 7.93  |
| 1615 | 38  | 5       | 381  | 385 | 4     | 1   | 3.6    | 80.799  | 32.532 | 0.403 | 44.46 | 78.89 | 40.28 | 10.03 |
| 1615 | 39  | 5       | 391  | 395 | 4     | 1   | 3      | 61.806  | 24.152 | 0.391 | 41.55 | 78.48 | 41.74 | 8.65  |
| 1615 | 40  | 5       | 401  | 405 | 4     | 1   | 3.3    | 106.173 | 35.318 | 0.333 | 42.35 | 76.47 | 42.94 | 7.99  |
| 1615 | 41  | 5       | 411  | 415 | 5     | 1   | 3.6    | 60      | 24.214 | 0.404 | 43.96 | 78.37 | 40.18 | 10.28 |
| 1615 | 42  | 5       | 421  | 425 | 5     | 1   | 3.3    | 113     | 44.877 | 0.397 | 39.43 | 75.85 | 43.14 | 8.43  |
| 1615 | 43  | 5       | 431  | 435 | 5     | 1   | 3.6    | 84.444  | 31.027 | 0.367 | 40.7  | 75.68 | 42.21 | 8.96  |
| 1615 | 44  | 5       | 441  | 445 | 5     | 1   | 4      | 70.222  | 27.095 | 0.386 | 49.07 | 82.44 | 33.01 | 11.88 |
| 1615 | 45  | 5       | 451  | 455 | 5     | 1   | 4      | 65.089  | 23.746 | 0.365 | 45.69 | 77.41 | 37.75 | 9.83  |
| 1615 | 46  | 5       | 461  | 465 | 5     | 1   | NA     | NA      | NA     | NA    | NA    | NA    | NA    | NA    |
| 1615 | 47  | 5       | 471  | 475 | 5     | 1   | 3.6    | 92.755  | 40.332 | 0.435 | 47.63 | 80.84 | 39.96 | 10.07 |
| 1615 | 48  | 5       | 481  | 485 | 5     | 1   | 4      | 84.298  | 28.609 | 0.339 | 47.05 | 78.87 | 37.82 | 10.43 |
| 1615 | 49  | 5       | 491  | 495 | 5     | 1   | NA     | NA      | NA     | NA    | NA    | NA    | NA    | NA    |
| 1615 | 50  | 5       | 501  | 505 | 5     | 1   | 3.4    | 112.963 | 42.844 | 0.379 | 46.55 | 82.26 | 35.31 | 11.7  |
| 1615 | 51  | 5       | 511  | 515 | 6     | 1   | 3.2    | 92.4    | 32.358 | 0.35  | 44.1  | 78.97 | 40.9  | 8.58  |
| 1615 | 52  | 5       | 521  | 525 | 6     | 1   | 2.8    | 46.365  | 14.574 | 0.314 | 45.48 | 78.58 | 37.59 | 10.15 |
| 1615 | 53  | 5       | 531  | 535 | 6     | 1   | 3.5    | 61.778  | 24.015 | 0.389 | 40.65 | 78.28 | 35.44 | 10.3  |
| 1615 | 54  | 5       | 541  | 545 | 6     | 1   | 3.8    | 81.248  | 30.081 | 0.37  | 46.07 | 81.04 | 38.04 | 10.11 |
| 1615 | 55  | 5       | 551  | 555 | 6     | 1   | 3.2    | 68.444  | 24.146 | 0.353 | 40.83 | 77.21 | 40.05 | 8.44  |
| 1615 | 56  | 5       | 561  | 565 | 6     | 1   | 3.2    | 45.833  | 14.614 | 0.319 | 46.43 | 80.59 | 38.35 | 10.13 |
| 1615 | 57  | 5       | 571  | 575 | 6     | 1   | 3.6    | 59.556  | 24.919 | 0.418 | 45.18 | 80.56 | 38.48 | 9.76  |
| 1615 | 58  | 5       | 581  | 585 | 6     | 1   | 3      | NA      | NA     | 0.316 | 37.91 | 75    | 45.88 | 7.23  |
| 1615 | 59  | 5       | 591  | 595 | 6     | 1   | 3.2    | 36.651  | 12.918 | 0.352 | 46.14 | 78.9  | 38.06 | 9.76  |
| 1615 | 60  | 5       | 601  | 605 | 6     | 1   | 2.9    | 28.532  | 10.819 | 0.379 | 41.05 | 78.3  | 41.15 | 8.6   |
| 1615 | 61  | 5       | 611  | 615 | 7     | 1   | 3.5    | 59.172  | 19.791 | 0.334 | 41.99 | 76.94 | 40.99 | 8.26  |
| 1615 | 62  | 5       | 621  | 625 | 7     | 1   | 3      | 35.714  | 13.694 | 0.383 | 46.47 | 81.74 | 36.93 | 9.5   |

**Table S2** Continued.

| Cut  | Gen | Cut.Rep | Plot | Int | Block | Rep | Height | GB      | DB     | DM    | ADF   | NDF   | DIG   | LIG   |
|------|-----|---------|------|-----|-------|-----|--------|---------|--------|-------|-------|-------|-------|-------|
| 1615 | 63  | 5       | 631  | 635 | 7     | 1   | 3.3    | 36      | 14.066 | 0.391 | 46.89 | 79.59 | 39.53 | 9.59  |
| 1615 | 64  | 5       | 641  | 645 | 7     | 1   | 3.5    | 66.327  | 23.236 | 0.35  | 46.62 | 78.36 | 42.41 | 8.77  |
| 1615 | 65  | 5       | 651  | 655 | 7     | 1   | 2.8    | 38.409  | 12.884 | 0.335 | 43.38 | 77.7  | 38.88 | 9.52  |
| 1615 | 66  | 5       | 661  | 665 | 7     | 1   | 3.4    | 62.444  | 24.702 | 0.396 | 41.28 | 79.29 | 41.83 | 8.65  |
| 1615 | 67  | 5       | 671  | 675 | 7     | 1   | 2.7    | 51.405  | 19.514 | 0.38  | 42.83 | 79.83 | 40.62 | 8.54  |
| 1615 | 68  | 5       | 681  | 685 | 7     | 1   | 3.3    | 108.025 | 35     | 0.324 | 42.88 | 79.4  | 40.14 | 9.85  |
| 1615 | 69  | 5       | 691  | 695 | 7     | 1   | 3.2    | 38.222  | 13.853 | 0.362 | 47.81 | 80.54 | 36.5  | 11    |
| 1615 | 70  | 5       | 701  | 705 | 7     | 1   | 3.7    | 62      | 21.288 | 0.343 | 43.31 | 77.4  | 40.95 | 9.72  |
| 1615 | 71  | 5       | 711  | 715 | 8     | 1   | 3      | 20      | 7.763  | 0.388 | 48.29 | 80.63 | 39.31 | 10.27 |
| 1615 | 72  | 5       | 721  | 725 | 8     | 1   | 3.4    | 60.889  | 22.271 | 0.366 | 42.23 | 77.1  | 39.6  | 9.55  |
| 1615 | 73  | 5       | 731  | 735 | 8     | 1   | 3.4    | 76.889  | 29.477 | 0.383 | 43.98 | 77.84 | 40.03 | 9.72  |
| 1615 | 74  | 5       | 741  | 745 | 8     | 1   | NA     | NA      | NA     | NA    | NA    | NA    | NA    | NA    |
| 1615 | 75  | 5       | 751  | 755 | 8     | 1   | 3.4    | 80.889  | 34.585 | 0.428 | 48.38 | 80.78 | 37.24 | 10.35 |
| 1615 | 76  | 5       | 761  | 765 | 8     | 1   | 3.2    | 64.472  | 24.684 | 0.383 | 43.75 | 78.33 | 40.47 | 8.51  |
| 1615 | 77  | 5       | 771  | 775 | 8     | 1   | NA     | NA      | NA     | NA    | NA    | NA    | NA    | NA    |
| 1615 | 78  | 5       | 781  | 785 | 8     | 1   | 3.6    | 63.556  | 21.858 | 0.344 | 43.72 | 78.3  | 38.66 | 10.34 |
| 1615 | 79  | 5       | 791  | 795 | 8     | 1   | 2.3    | 35.111  | 14.439 | 0.411 | 46.03 | 78.84 | 35.81 | 10.2  |
| 1615 | 80  | 5       | 801  | 805 | 8     | 1   | 3.2    | 48.469  | 15.822 | 0.326 | 45.45 | 78.75 | 41.62 | 9.61  |
| 1615 | 81  | 5       | 811  | 815 | 9     | 1   | 3.3    | 37.037  | 12.882 | 0.348 | 42.02 | 76.79 | 43.84 | 7.71  |
| 1615 | 82  | 5       | 821  | 825 | 9     | 1   | 3.4    | 59.556  | 25.495 | 0.428 | 43.5  | 79.76 | 36.78 | 10.17 |
| 1615 | 83  | 5       | 831  | 835 | 9     | 1   | 3.6    | 41.25   | 15.365 | 0.372 | 42.85 | 77.62 | 33.91 | 10.27 |
| 1615 | 84  | 5       | 841  | 845 | 9     | 1   | 3.4    | 39.669  | 17.354 | 0.437 | 43.18 | 79.65 | 35.9  | 10.19 |
| 1615 | 85  | 5       | 851  | 855 | 9     | 1   | 3.5    | 49.704  | 20.94  | 0.421 | 43.18 | 79.25 | 36.85 | 10.06 |
| 1615 | 86  | 5       | 861  | 865 | 9     | 1   | 3.8    | 32.653  | 11.904 | 0.365 | 44.2  | 79.34 | 36.86 | 10    |
| 1615 | 87  | 5       | 871  | 875 | 9     | 1   | 3.8    | 44.247  | 15.06  | 0.34  | 40.55 | 76.03 | 41.73 | 9.34  |
| 1615 | 88  | 5       | 881  | 885 | 9     | 1   | 3.5    | 33.163  | 10.701 | 0.323 | 41.91 | 77.13 | 37.19 | 9.32  |
| 1615 | 89  | 5       | 891  | 895 | 9     | 1   | 3.3    | 33.045  | 12.657 | 0.383 | 41.39 | 78.72 | 40.7  | 9.06  |
| 1615 | 90  | 5       | 901  | 905 | 9     | 1   | 3      | 57.857  | 20.135 | 0.348 | 41.41 | 77.95 | 38.27 | 9.5   |
| 1615 | 91  | 5       | 911  | 915 | 10    | 1   | 3.3    | 29.778  | 10.299 | 0.346 | 44.89 | 81.29 | 35.19 | 10.82 |
| 1615 | 92  | 5       | 921  | 925 | 10    | 1   | 3.8    | 50      | 16.158 | 0.323 | 42.07 | 75.04 | 40.48 | 9.52  |
| 1615 | 93  | 5       | 931  | 935 | 10    | 1   | 3.1    | 56.25   | 20.802 | 0.37  | 42.55 | 75.86 | 41.79 | 8.75  |



**Table S2** Continued.

| Cut  | Gen | Cut.Rep | Plot | Int  | Block | Rep | Height | GB     | DB     | DM    | ADF   | NDF   | DIG   | LIG   |
|------|-----|---------|------|------|-------|-----|--------|--------|--------|-------|-------|-------|-------|-------|
| 1615 | 94  | 5       | 941  | 945  | 10    | 1   | 2.8    | 54.238 | 19.306 | 0.356 | 39.34 | 72.97 | 43.89 | 8.03  |
| 1615 | 95  | 5       | 951  | 955  | 10    | 1   | 3.6    | 80     | 30.435 | 0.38  | 45.82 | 80.1  | 33.72 | 11.57 |
| 1615 | 96  | 5       | 961  | 965  | 10    | 1   | 3.6    | 56.213 | 19.502 | 0.347 | 44.64 | 79.57 | 41.34 | 9.12  |
| 1615 | 97  | 5       | 971  | 975  | 10    | 1   | 3.8    | 78.667 | 28.309 | 0.36  | 42.86 | 76.96 | 40.12 | 9.81  |
| 1615 | 98  | 5       | 981  | 985  | 10    | 1   | 3.2    | 41     | 16.557 | 0.404 | 45.5  | 79.95 | 38.07 | 10.43 |
| 1615 | 99  | 5       | 991  | 995  | 10    | 1   | 0      | 0      | 0      | 0     | 0     | 0     | 0     | 0     |
| 1615 | 100 | 5       | 1001 | 1005 | 10    | 1   | 0      | 0      | 0      | 0     | 0     | 0     | 0     | 0     |
| 250  | 1   | 6       | 12   | 11   | 11    | 2   | 2.95   | 36.33  | 17.18  | 0.45  | 50.96 | 80.07 | 36.42 | 9.16  |
| 250  | 2   | 6       | 22   | 21   | 12    | 2   | 3.65   | 58.33  | 21.87  | 0.38  | 50.73 | 77.99 | 35.79 | 9.19  |
| 250  | 3   | 6       | 32   | 31   | 13    | 2   | 3.05   | 34.67  | 13.49  | 0.39  | 54.16 | 81.07 | 32.87 | 10.31 |
| 250  | 4   | 6       | 42   | 41   | 14    | 2   | 2.5    | 21.69  | 7.32   | 0.34  | 47.05 | 75.4  | 37.56 | 8.89  |
| 250  | 5   | 6       | 52   | 51   | 15    | 2   | 2.95   | 29     | 12.33  | 0.43  | 49.76 | 77.86 | 37.66 | 8.35  |
| 250  | 6   | 6       | 62   | 61   | 16    | 2   | 3.65   | 16.97  | 7.99   | 0.47  | 58.47 | 84.88 | 29.68 | 10.95 |
| 250  | 7   | 6       | 72   | 71   | 17    | 2   | 2.6    | 25.33  | 11.29  | 0.45  | 54.39 | 81.33 | 31.78 | 11.08 |
| 250  | 8   | 6       | 82   | 81   | 18    | 2   | 2.65   | 16.83  | 7.33   | 0.44  | 51.73 | 79.44 | 35.8  | 8.99  |
| 250  | 9   | 6       | 92   | 91   | 19    | 2   | 3.1    | 27.37  | 11.37  | 0.42  | 50.26 | 78.02 | 38.29 | 8.32  |
| 250  | 10  | 6       | 102  | 101  | 20    | 2   | 2.65   | 25.08  | 9.69   | 0.39  | 54.24 | 80.49 | 33.49 | 10.31 |
| 250  | 11  | 6       | 112  | 111  | 11    | 2   | 2.75   | 18.67  | 9.32   | 0.5   | 47.05 | 76.32 | 39.52 | 8.1   |
| 250  | 12  | 6       | 122  | 121  | 12    | 2   | 2.2    | 22.92  | 10.86  | 0.47  | 49.34 | 77.06 | 38.42 | 8.07  |
| 250  | 13  | 6       | 132  | 131  | 13    | 2   | 2.75   | 17.3   | 8.12   | 0.47  | 52.44 | 79.83 | 35.21 | 9.67  |
| 250  | 14  | 6       | 142  | 141  | 14    | 2   | 2.7    | 20.56  | 9.89   | 0.48  | 48.89 | 78.22 | 37.18 | 9.05  |
| 250  | 15  | 6       | 152  | 151  | 15    | 2   | 2.85   | 30.83  | 11.96  | 0.39  | 51.44 | 77.32 | 35.11 | 10.02 |
| 250  | 16  | 6       | 162  | 161  | 16    | 2   | 2.65   | 15.17  | 4.65   | 0.31  | 45.63 | 72.69 | 40.27 | 8.18  |
| 250  | 17  | 6       | 172  | 171  | 17    | 2   | 2.75   | 20.5   | 6.5    | 0.32  | 51.01 | 77.54 | 34.68 | 9.2   |
| 250  | 18  | 6       | 182  | 181  | 18    | 2   | 3.3    | 37     | 13.4   | 0.36  | 52.62 | 78.74 | 36.55 | 9.45  |
| 250  | 19  | 6       | 192  | 191  | 19    | 2   | 2.55   | 30     | 14.57  | 0.49  | 48.07 | 76.89 | 36.02 | 8.89  |
| 250  | 20  | 6       | 202  | 201  | 20    | 2   | 2.25   | 19.83  | 9.4    | 0.47  | 50.96 | 79.87 | 34.77 | 8.88  |
| 250  | 21  | 6       | 212  | 211  | 11    | 2   | 2.85   | 32.9   | 17.04  | 0.52  | 51.6  | 79.45 | 34.69 | 10.07 |
| 250  | 22  | 6       | 222  | 221  | 12    | 2   | 2.25   | 15.07  | 6.78   | 0.45  | 50.67 | 77.27 | 35.41 | 10.05 |
| 250  | 23  | 6       | 232  | 231  | 13    | 2   | 2.65   | 29.17  | 8.26   | 0.28  | 51.08 | 80.08 | 35.73 | 9.71  |
| 250  | 24  | 6       | 242  | 241  | 14    | 2   | 2.35   | 25.95  | 9.91   | 0.38  | 53.51 | 81.09 | 32.12 | 10.9  |

**Table S2** Continued.

| Cut | Gen | Cut.Rep | Plot | Int | Block | Rep | Height | GB    | DB    | DM   | ADF   | NDF   | DIG   | LIG   |
|-----|-----|---------|------|-----|-------|-----|--------|-------|-------|------|-------|-------|-------|-------|
| 250 | 25  | 6       | 252  | 251 | 15    | 2   | 2.5    | 25.33 | 11.67 | 0.46 | 48.87 | 76.5  | 37.16 | 8.51  |
| 250 | 26  | 6       | 262  | 261 | 16    | 2   | 2.3    | 27.03 | 12.15 | 0.45 | 51.14 | 80.86 | 35.81 | 8.66  |
| 250 | 27  | 6       | 272  | 271 | 17    | 2   | 2.35   | 27.83 | 11.64 | 0.42 | 51.5  | 79.46 | 34.47 | 9.51  |
| 250 | 28  | 6       | 282  | 281 | 18    | 2   | 2.65   | 28.83 | 11.5  | 0.4  | 52.53 | 79.04 | 35.65 | 9.51  |
| 250 | 29  | 6       | 292  | 291 | 19    | 2   | 2.4    | 19    | 8.37  | 0.44 | 53.13 | 79.37 | 36.35 | 9.55  |
| 250 | 30  | 6       | 302  | 301 | 20    | 2   | 2.15   | 19.5  | 7.97  | 0.41 | 49.24 | 78.93 | 38.91 | 9.46  |
| 250 | 31  | 6       | 312  | 311 | 11    | 2   | 2.05   | 38.74 | 15.75 | 0.41 | 48.24 | 77.2  | 34.9  | 9.22  |
| 250 | 32  | 6       | 322  | 321 | 12    | 2   | 2.55   | 32.63 | 16.33 | 0.5  | 50.01 | 78.96 | 34.94 | 9.57  |
| 250 | 33  | 6       | 332  | 331 | 13    | 2   | 2.8    | 21.17 | 8.37  | 0.4  | 51.47 | 81.06 | 33.49 | 9.83  |
| 250 | 34  | 6       | 342  | 341 | 14    | 2   | 2.25   | 20.28 | 9.46  | 0.47 | 50.78 | 79    | 34.18 | 10.36 |
| 250 | 35  | 6       | 352  | 351 | 15    | 2   | 2.65   | 27.03 | 8.82  | 0.33 | 51.27 | 80.06 | 32.95 | 10.14 |
| 250 | 36  | 6       | 362  | 361 | 16    | 2   | 3.6    | 48.15 | 21.9  | 0.46 | 48.01 | 76.07 | 40.63 | 7.73  |
| 250 | 37  | 6       | 372  | 371 | 17    | 2   | 3.7    | 48.17 | 20.13 | 0.42 | 51.36 | 79.09 | 34.54 | 10.44 |
| 250 | 38  | 6       | 382  | 381 | 18    | 2   | 2.15   | 14.67 | 6.13  | 0.42 | 49.41 | 77.97 | 35.9  | 9.5   |
| 250 | 39  | 6       | 392  | 391 | 19    | 2   | 3.55   | 52.17 | 21.99 | 0.42 | 54.36 | 81.77 | 32.25 | 10.71 |
| 250 | 40  | 6       | 402  | 401 | 20    | 2   | 3.2    | 38.24 | 17.68 | 0.46 | 50.23 | 79.51 | 35.96 | 9.05  |
| 250 | 41  | 6       | 412  | 411 | 11    | 2   | 2.65   | 27.33 | 13.65 | 0.5  | 53.01 | 83.4  | 35.24 | 9.77  |
| 250 | 42  | 6       | 422  | 421 | 12    | 2   | 2.35   | 54.95 | 22.01 | 0.4  | 51.01 | 80.03 | 36.19 | 9.09  |
| 250 | 43  | 6       | 432  | 431 | 13    | 2   | 3.05   | 31.17 | 14.59 | 0.47 | 52.97 | 80.35 | 33.58 | 9.89  |
| 250 | 44  | 6       | 442  | 441 | 14    | 2   | 2.65   | 30.93 | 16.64 | 0.54 | 49.37 | 79.45 | 34.57 | 9.32  |
| 250 | 45  | 6       | 452  | 451 | 15    | 2   | 2.85   | 23.83 | 9.67  | 0.41 | 48.76 | 76.81 | 35.47 | 8.55  |
| 250 | 46  | 6       | 462  | 461 | 16    | 2   | 2.7    | 10    | 4.44  | 0.44 | 49.51 | 77.23 | 36.95 | 9.18  |
| 250 | 47  | 6       | 472  | 471 | 17    | 2   | 2.4    | 21.83 | 10.88 | 0.5  | 51.24 | 80.04 | 36.23 | 9.46  |
| 250 | 48  | 6       | 482  | 481 | 18    | 2   | 3.6    | 41.67 | 15.67 | 0.38 | 47.42 | 75.73 | 37.76 | 8.88  |
| 250 | 49  | 6       | 492  | 491 | 19    | 2   | 1.65   | 17.17 | 7.21  | 0.42 | 47.83 | 75.7  | 37.17 | 9.14  |
| 250 | 50  | 6       | 502  | 501 | 20    | 2   | 3.2    | 31.36 | 14.82 | 0.47 | 52.23 | 81.22 | 30.38 | 10.44 |
| 250 | 51  | 6       | 512  | 511 | 11    | 2   | 3.05   | 45.79 | 17.32 | 0.38 | 48.51 | 78.83 | 36.8  | 8.82  |
| 250 | 52  | 6       | 522  | 521 | 12    | 2   | 3.3    | 36.14 | 12.33 | 0.34 | 52.6  | 78.73 | 36.5  | 10.06 |
| 250 | 53  | 6       | 532  | 531 | 13    | 2   | 3.85   | 43.08 | 14.52 | 0.34 | 55.04 | 82.41 | 33.31 | 10.8  |
| 250 | 54  | 6       | 542  | 541 | 14    | 2   | 3.8    | 43.69 | 18.12 | 0.42 | 53.71 | 79.95 | 34.53 | 10.54 |
| 250 | 55  | 6       | 552  | 551 | 15    | 2   | 3.7    | 69.5  | 28.33 | 0.41 | 50.5  | 78.96 | 36.72 | 8.68  |

**Table S2** Continued.

| Cut | Gen | Cut.Rep | Plot | Int | Block | Rep | Height | GB    | DB    | DM   | ADF   | NDF   | DIG   | LIG   |
|-----|-----|---------|------|-----|-------|-----|--------|-------|-------|------|-------|-------|-------|-------|
| 250 | 56  | 6       | 562  | 561 | 16    | 2   | 3.8    | 33.33 | 13.78 | 0.41 | 50.25 | 77.98 | 32.66 | 9.55  |
| 250 | 57  | 6       | 572  | 571 | 17    | 2   | 2.45   | 26    | 12.36 | 0.48 | 50.34 | 78.22 | 36.42 | 8.54  |
| 250 | 58  | 6       | 582  | 581 | 18    | 2   | 3.3    | 30.17 | 11.77 | 0.39 | 46.71 | 76.27 | 40.43 | 6.82  |
| 250 | 59  | 6       | 592  | 591 | 19    | 2   | 3.5    | 35.68 | 16.81 | 0.47 | 51.82 | 78.58 | 34.54 | 9.5   |
| 250 | 60  | 6       | 602  | 601 | 20    | 2   | 3.35   | 41.33 | 13.89 | 0.34 | 52.55 | 79.72 | 37.46 | 9.05  |
| 250 | 61  | 6       | 612  | 611 | 11    | 2   | 3.05   | 32.17 | 15.88 | 0.49 | 47.02 | 76.73 | 37.96 | 8.29  |
| 250 | 62  | 6       | 622  | 621 | 12    | 2   | 2      | 17.33 | 9.37  | 0.54 | 50.72 | 78.93 | 35.23 | 8.51  |
| 250 | 63  | 6       | 632  | 631 | 13    | 2   | 2.45   | 22.83 | 10.81 | 0.47 | 49.01 | 77.01 | 38.76 | 7.91  |
| 250 | 64  | 6       | 642  | 641 | 14    | 2   | 2.45   | 28.5  | 13.91 | 0.49 | 48.43 | 77.83 | 37.15 | 9     |
| 250 | 65  | 6       | 652  | 651 | 15    | 2   | 2.25   | 19.83 | 7.46  | 0.38 | 47.2  | 75.91 | 39.04 | 7.92  |
| 250 | 66  | 6       | 662  | 661 | 16    | 2   | 2.25   | 9.17  | 4.11  | 0.45 | 54.52 | 81.07 | 32.31 | 9.49  |
| 250 | 67  | 6       | 672  | 671 | 17    | 2   | 3.15   | 45.05 | 19.13 | 0.43 | 49.01 | 77.97 | 37.85 | 8.56  |
| 250 | 68  | 6       | 682  | 681 | 18    | 2   | 2.75   | 15    | 5.52  | 0.37 | 50.04 | 76.93 | 33.62 | 8.89  |
| 250 | 69  | 6       | 692  | 691 | 19    | 2   | 2.6    | 23.17 | 9.92  | 0.43 | 48.57 | 77.39 | 36.96 | 8.49  |
| 250 | 70  | 6       | 702  | 701 | 20    | 2   | 2.75   | 30.5  | 15.99 | 0.52 | 47.83 | 75.63 | 38.81 | 8.1   |
| 250 | 71  | 6       | 712  | 711 | 11    | 2   | 2.25   | 32.43 | 15.84 | 0.49 | 46.64 | 76.3  | 40.48 | 7.77  |
| 250 | 72  | 6       | 722  | 721 | 12    | 2   | 2.25   | 31.83 | 15.46 | 0.49 | 51.72 | 80.66 | 34.81 | 9.28  |
| 250 | 73  | 6       | 732  | 731 | 13    | 2   | 2.2    | 35.24 | 15.53 | 0.44 | 49.83 | 78.98 | 37.43 | 9.45  |
| 250 | 74  | 6       | 742  | 741 | 14    | 2   | 2.95   | 34.5  | 11.42 | 0.33 | 53.28 | 79.13 | 31.07 | 11.4  |
| 250 | 75  | 6       | 752  | 751 | 15    | 2   | 2.35   | 27.86 | 12.65 | 0.45 | 47.64 | 76.17 | 39.45 | 8.38  |
| 250 | 76  | 6       | 762  | 761 | 16    | 2   | 2.1    | 28.5  | 15.09 | 0.53 | 49.19 | 77.74 | 37.07 | 8.9   |
| 250 | 77  | 6       | 772  | 771 | 17    | 2   | 2.9    | 21.33 | 7.57  | 0.36 | 53.2  | 78.32 | 34.54 | 10.69 |
| 250 | 78  | 6       | 782  | 781 | 18    | 2   | 3.75   | 42.33 | 15.75 | 0.37 | 50.74 | 76.8  | 34.71 | 9.9   |
| 250 | 79  | 6       | 792  | 791 | 19    | 2   | 1.95   | 24.67 | 11.33 | 0.46 | 50.14 | 77.53 | 35.87 | 8.86  |
| 250 | 80  | 6       | 802  | 801 | 20    | 2   | 2.2    | 25.67 | 12.89 | 0.5  | 48.08 | 77.55 | 38.52 | 8.41  |
| 250 | 81  | 6       | 812  | 811 | 11    | 2   | 2.05   | 24.17 | 11.34 | 0.47 | 49.94 | 76.97 | 37.56 | 8.28  |
| 250 | 82  | 6       | 822  | 821 | 12    | 2   | 2.35   | 22.42 | 10    | 0.45 | 49.5  | 78.72 | 37.79 | 9.04  |
| 250 | 83  | 6       | 832  | 831 | 13    | 2   | 2.8    | 24    | 7.84  | 0.33 | 47.67 | 74.41 | 38.37 | 8.71  |
| 250 | 84  | 6       | 842  | 841 | 14    | 2   | 2.4    | 31.67 | 15.48 | 0.49 | 54.33 | 81.89 | 32.32 | 10.86 |
| 250 | 85  | 6       | 852  | 851 | 15    | 2   | 2.45   | 18.43 | 7.64  | 0.41 | 52    | 80.67 | 35.55 | 10.3  |
| 250 | 86  | 6       | 862  | 861 | 16    | 2   | 2.2    | 21.33 | 9.69  | 0.45 | 50.49 | 79.13 | 36.03 | 9.13  |

**Table S2** Continued.

| Cut | Gen | Cut.Rep | Plot | Int  | Block | Rep | Height | GB    | DB    | DM   | ADF   | NDF   | DIG   | LIG   |
|-----|-----|---------|------|------|-------|-----|--------|-------|-------|------|-------|-------|-------|-------|
| 250 | 87  | 6       | 872  | 871  | 17    | 2   | 3.85   | 28.33 | 9.15  | 0.32 | 50.5  | 79.35 | 35.71 | 9.26  |
| 250 | 88  | 6       | 882  | 881  | 18    | 2   | 3.6    | 37.17 | 12.98 | 0.35 | 53.51 | 80.55 | 34.27 | 10.8  |
| 250 | 89  | 6       | 892  | 891  | 19    | 2   | 2.4    | 23.83 | 10.15 | 0.43 | 50.14 | 78.54 | 37.68 | 8.92  |
| 250 | 90  | 6       | 902  | 901  | 20    | 2   | 1.9    | 16.75 | 8.31  | 0.5  | 44.35 | 74.02 | 41.02 | 6.97  |
| 250 | 91  | 6       | 912  | 911  | 11    | 2   | 2.25   | 14.1  | 4.16  | 0.3  | 46.8  | 75.12 | 37.62 | 8.46  |
| 250 | 92  | 6       | 922  | 921  | 12    | 2   | 3.65   | 28.11 | 12.07 | 0.43 | 48.66 | 77.05 | 35.22 | 10.21 |
| 250 | 93  | 6       | 932  | 931  | 13    | 2   | 3.5    | 31.11 | 10.86 | 0.35 | 52.19 | 79.53 | 35.85 | 9.93  |
| 250 | 94  | 6       | 942  | 941  | 14    | 2   | 3.65   | 29.79 | 11.28 | 0.38 | 52.06 | 77.68 | 34.2  | 9.82  |
| 250 | 95  | 6       | 952  | 951  | 15    | 2   | 4.05   | 67.25 | 34.36 | 0.51 | 53.54 | 80.52 | 34.01 | 10.61 |
| 250 | 96  | 6       | 962  | 961  | 16    | 2   | 3.85   | 40.67 | 16.01 | 0.39 | 54.1  | 81.35 | 36.24 | 9.66  |
| 250 | 97  | 6       | 972  | 971  | 17    | 2   | 3.5    | 41.67 | 17.43 | 0.42 | 47.2  | 74.85 | 37.34 | 8.48  |
| 250 | 98  | 6       | 982  | 981  | 18    | 2   | 3.6    | 33.51 | 15.01 | 0.45 | 54.34 | 80.59 | 31.28 | 10.73 |
| 250 | 99  | 6       | 992  | 991  | 19    | 2   | 2.4    | 27    | 14.22 | 0.53 | 51.15 | 79.27 | 32.88 | 10.48 |
| 250 | 100 | 6       | 1002 | 1001 | 20    | 2   | 2.35   | 21.33 | 9.84  | 0.46 | 45.2  | 75.52 | 39.86 | 7.71  |
| 500 | 1   | 7       | 12   | 12   | 11    | 2   | 4.77   | 91.06 | 31.05 | 0.34 | 51.16 | 79.42 | 32.14 | 9.88  |
| 500 | 2   | 7       | 22   | 22   | 12    | 2   | 5.07   | 125.5 | 52.93 | 0.42 | 55.57 | 81.38 | 30.9  | 12.02 |
| 500 | 3   | 7       | 32   | 32   | 13    | 2   | 4.7    | 87.93 | 32.79 | 0.37 | 53.26 | 80.86 | 28.47 | 11.72 |
| 500 | 4   | 7       | 42   | 42   | 14    | 2   | 4.17   | 59.58 | 27.09 | 0.46 | 56.94 | 85.15 | 33.45 | 10.94 |
| 500 | 5   | 7       | 52   | 52   | 15    | 2   | 4.27   | 65.5  | 25.56 | 0.39 | 56.42 | 82.15 | 29.63 | 11.21 |
| 500 | 6   | 7       | 62   | 62   | 16    | 2   | 5      | 41.85 | 16.46 | 0.39 | 55.37 | 83.05 | 30.69 | 11.4  |
| 500 | 7   | 7       | 72   | 72   | 17    | 2   | 3.93   | 62.7  | 27.94 | 0.45 | 54.18 | 81.96 | 25.28 | 11.59 |
| 500 | 8   | 7       | 82   | 82   | 18    | 2   | 4      | 44.5  | 18.36 | 0.41 | 55.96 | 82.02 | 31.93 | 11.18 |
| 500 | 9   | 7       | 92   | 92   | 19    | 2   | 4.1    | 59.67 | 25.49 | 0.43 | 54.29 | 82.18 | 32.61 | 10.62 |
| 500 | 10  | 7       | 102  | 102  | 20    | 2   | 3.13   | 78.48 | 23.04 | 0.29 | 54.88 | 79.93 | 34.26 | 11.09 |
| 500 | 11  | 7       | 112  | 112  | 11    | 2   | 4.7    | 64.84 | 26.14 | 0.4  | 52.13 | 80.25 | 33.87 | 10.08 |
| 500 | 12  | 7       | 122  | 122  | 12    | 2   | 4.4    | 54.59 | 23.14 | 0.42 | 57.59 | 84.55 | 31.6  | 12.39 |
| 500 | 13  | 7       | 132  | 132  | 13    | 2   | 4.97   | 77.41 | 28.45 | 0.37 | 51.86 | 79.28 | 33.81 | 10.2  |
| 500 | 14  | 7       | 142  | 142  | 14    | 2   | 4.7    | 72.53 | 25.18 | 0.35 | 55.59 | 83.18 | 32.48 | 12.44 |
| 500 | 15  | 7       | 152  | 152  | 15    | 2   | 3.67   | 58.02 | 20.79 | 0.36 | 56.51 | 82.01 | 30.13 | 12.13 |
| 500 | 16  | 7       | 162  | 162  | 16    | 2   | 4.07   | 79.33 | 26.4  | 0.33 | 52.14 | 78.41 | 32.59 | 11.54 |
| 500 | 17  | 7       | 172  | 172  | 17    | 2   | 4.03   | 42.74 | 17.16 | 0.4  | 56.36 | 83.52 | 24.06 | 13.2  |

**Table S2** Continued.

| Cut | Gen | Cut.Rep | Plot | Int | Block | Rep | Height | GB     | DB    | DM   | ADF   | NDF   | DIG   | LIG   |
|-----|-----|---------|------|-----|-------|-----|--------|--------|-------|------|-------|-------|-------|-------|
| 500 | 18  | 7       | 182  | 182 | 18    | 2   | 4.2    | 97.5   | 31.69 | 0.33 | 53.54 | 79.88 | 32.8  | 11    |
| 500 | 19  | 7       | 192  | 192 | 19    | 2   | 4.27   | 72.83  | 26.24 | 0.36 | 57.41 | 83.37 | 30.07 | 12.16 |
| 500 | 20  | 7       | 202  | 202 | 20    | 2   | 4.23   | 107.5  | 39.05 | 0.36 | 55.15 | 81.42 | 32.32 | 11.88 |
| 500 | 21  | 7       | 212  | 212 | 11    | 2   | 5.07   | 92.07  | 41.16 | 0.45 | 53.51 | 81.47 | 31.88 | 10.49 |
| 500 | 22  | 7       | 222  | 222 | 12    | 2   | 3.47   | 38.69  | 21.87 | 0.57 | 60.41 | 86.86 | 24.9  | 14.86 |
| 500 | 23  | 7       | 232  | 232 | 13    | 2   | 4.1    | 59.44  | 20.36 | 0.34 | 56.04 | 81.8  | 24.38 | 13.12 |
| 500 | 24  | 7       | 242  | 242 | 14    | 2   | 3.87   | 68.33  | 23.86 | 0.35 | 53.97 | 81.93 | 32.91 | 11.77 |
| 500 | 25  | 7       | 252  | 252 | 15    | 2   | 3.9    | 53.88  | 23.3  | 0.43 | 55.76 | 81.79 | 24.88 | 13.37 |
| 500 | 26  | 7       | 262  | 262 | 16    | 2   | 4.07   | 120.56 | 46.44 | 0.39 | 57.4  | 83.93 | 29.44 | 12    |
| 500 | 27  | 7       | 272  | 272 | 17    | 2   | 4.03   | 58.17  | 27.72 | 0.48 | 54.66 | 82.06 | 24.83 | 11.63 |
| 500 | 28  | 7       | 282  | 282 | 18    | 2   | 3.8    | 45.17  | 18    | 0.4  | 56.16 | 83.74 | 28.24 | 13.16 |
| 500 | 29  | 7       | 292  | 292 | 19    | 2   | 4.17   | 54.77  | 24.02 | 0.44 | 56.86 | 83.09 | 26.38 | 12.6  |
| 500 | 30  | 7       | 302  | 302 | 20    | 2   | 3.1    | 57.12  | 22.92 | 0.4  | 54.92 | 82.46 | 31.47 | 11.63 |
| 500 | 31  | 7       | 312  | 312 | 11    | 2   | 4.07   | 49.26  | 20.35 | 0.41 | 55.2  | 81.87 | 25.7  | 12.31 |
| 500 | 32  | 7       | 322  | 322 | 12    | 2   | 4.73   | 98.38  | 39.89 | 0.41 | 53.24 | 78.81 | 29.65 | 10.39 |
| 500 | 33  | 7       | 332  | 332 | 13    | 2   | 4.37   | 55.71  | 23.77 | 0.43 | 54.57 | 81.96 | 32.42 | 10.26 |
| 500 | 34  | 7       | 342  | 342 | 14    | 2   | 3.77   | 38.45  | 17.07 | 0.44 | 55.05 | 82.11 | 27.19 | 11.69 |
| 500 | 35  | 7       | 352  | 352 | 15    | 2   | 4.37   | 55.56  | 20.62 | 0.37 | 54.02 | 80.96 | 28.82 | 11.5  |
| 500 | 36  | 7       | 362  | 362 | 16    | 2   | 5.07   | 104    | 28.66 | 0.28 | 53.15 | 79.25 | 32.78 | 10.42 |
| 500 | 37  | 7       | 372  | 372 | 17    | 2   | 4.07   | 103.06 | 39.3  | 0.38 | 51.41 | 78.71 | 34.84 | 8.41  |
| 500 | 38  | 7       | 382  | 382 | 18    | 2   | 3.9    | 40.33  | 16.63 | 0.41 | 53.28 | 77.69 | 29.24 | 10.29 |
| 500 | 39  | 7       | 392  | 392 | 19    | 2   | 4.1    | 86.17  | 37.56 | 0.44 | 54.35 | 80.17 | 29.74 | 10.77 |
| 500 | 40  | 7       | 402  | 402 | 20    | 2   | 4.6    | 90.97  | 34.53 | 0.38 | 49.19 | 73.84 | 37.13 | 8.44  |
| 500 | 41  | 7       | 412  | 412 | 11    | 2   | 4.17   | 94.41  | 41.65 | 0.44 | 56.03 | 80.88 | 29.24 | 12.52 |
| 500 | 42  | 7       | 422  | 422 | 12    | 2   | 4.73   | 94.01  | 42.31 | 0.45 | 52.05 | 77.98 | 31.87 | 9.45  |
| 500 | 43  | 7       | 432  | 432 | 13    | 2   | 4.13   | 73.82  | 32.31 | 0.44 | 54.31 | 80.16 | 28.2  | 11.76 |
| 500 | 44  | 7       | 442  | 442 | 14    | 2   | 4.27   | 82.04  | 37.06 | 0.45 | 54.27 | 80.29 | 30.95 | 10.37 |
| 500 | 45  | 7       | 452  | 452 | 15    | 2   | 4.07   | 44.72  | 15.01 | 0.34 | 54.78 | 79.01 | 34.29 | 10.29 |
| 500 | 46  | 7       | 462  | 462 | 16    | 2   | 3.93   | 28.6   | 11.46 | 0.4  | 53.32 | 78.58 | 30.84 | 10.03 |
| 500 | 47  | 7       | 472  | 472 | 17    | 2   | 4.17   | 70.99  | 30.32 | 0.43 | 53.92 | 78.79 | 33.8  | 10.68 |
| 500 | 48  | 7       | 482  | 482 | 18    | 2   | 4.43   | 98     | 34.52 | 0.35 | 53.75 | 80.22 | 28.81 | 11.35 |

**Table S2** Continued.

| Cut | Gen | Cut.Rep | Plot | Int | Block | Rep | Height | GB     | DB    | DM   | ADF   | NDF   | DIG   | LIG   |
|-----|-----|---------|------|-----|-------|-----|--------|--------|-------|------|-------|-------|-------|-------|
| 500 | 49  | 7       | 492  | 492 | 19    | 2   | 1.6    | 27.67  | 8.54  | 0.31 | 50.05 | 76.36 | 35.18 | 9.5   |
| 500 | 50  | 7       | 502  | 502 | 20    | 2   | 4.4    | 72.69  | 31.94 | 0.44 | 55.64 | 82.08 | 25.71 | 12.05 |
| 500 | 51  | 7       | 512  | 512 | 11    | 2   | 4.47   | 128.7  | 51.28 | 0.4  | 55.3  | 80.08 | 33.54 | 10.54 |
| 500 | 52  | 7       | 522  | 522 | 12    | 2   | 4.5    | 94.67  | 36.95 | 0.39 | 50.19 | 75.5  | 31.98 | 9.29  |
| 500 | 53  | 7       | 532  | 532 | 13    | 2   | 3.77   | 84.13  | 33.79 | 0.4  | 54.59 | 79.63 | 29.93 | 11.42 |
| 500 | 54  | 7       | 542  | 542 | 14    | 2   | 4.07   | 103.33 | 44.58 | 0.43 | 52.72 | 79.84 | 31.39 | 10.2  |
| 500 | 55  | 7       | 552  | 552 | 15    | 2   | 4.37   | 114.59 | 40.24 | 0.35 | 56.84 | 81.32 | 29.19 | 11.82 |
| 500 | 56  | 7       | 562  | 562 | 16    | 2   | 4.67   | 77.48  | 30.63 | 0.4  | 52.27 | 80.33 | 28.18 | 11.12 |
| 500 | 57  | 7       | 572  | 572 | 17    | 2   | 4.03   | 81     | 36.39 | 0.45 | 53.49 | 79.48 | 31.84 | 10.82 |
| 500 | 58  | 7       | 582  | 582 | 18    | 2   | 3.8    | 67.39  | 24.97 | 0.37 | 47.89 | 74.61 | 37.23 | 7.73  |
| 500 | 59  | 7       | 592  | 592 | 19    | 2   | 3.9    | 72.25  | 32.44 | 0.45 | 50.34 | 76.41 | 35.51 | 9.7   |
| 500 | 60  | 7       | 602  | 602 | 20    | 2   | 3.77   | 68.82  | 29.19 | 0.42 | 53.71 | 79.46 | 31.36 | 10.37 |
| 500 | 61  | 7       | 612  | 612 | 11    | 2   | 5.5    | 110    | 42.8  | 0.39 | 59.1  | 83.99 | 31.66 | 12.16 |
| 500 | 62  | 7       | 622  | 622 | 12    | 2   | 4.37   | 41.08  | 19.76 | 0.48 | 54.76 | 79.99 | 29.31 | 9.87  |
| 500 | 63  | 7       | 632  | 632 | 13    | 2   | 4.4    | 57.59  | 24.87 | 0.43 | 49.16 | 74.79 | 36.73 | 8.58  |
| 500 | 64  | 7       | 642  | 642 | 14    | 2   | 4.93   | 115.32 | 41.63 | 0.36 | 52.85 | 79.54 | 32.86 | 10.62 |
| 500 | 65  | 7       | 652  | 652 | 15    | 2   | 3.73   | 46.29  | 19.05 | 0.41 | 52.56 | 77.28 | 32.49 | 11    |
| 500 | 66  | 7       | 662  | 662 | 16    | 2   | 3.87   | 37.12  | 16.49 | 0.44 | 53.61 | 78.99 | 32.34 | 9.91  |
| 500 | 67  | 7       | 672  | 672 | 17    | 2   | 3.77   | 78.96  | 32.87 | 0.42 | 54.69 | 79.53 | 32.35 | 11.26 |
| 500 | 68  | 7       | 682  | 682 | 18    | 2   | 4.83   | 51.92  | 18.11 | 0.35 | 51.12 | 77.66 | 32.91 | 10.38 |
| 500 | 69  | 7       | 692  | 692 | 19    | 2   | 4.6    | 69.37  | 27.83 | 0.4  | 56.81 | 81.31 | 30.51 | 11.68 |
| 500 | 70  | 7       | 702  | 702 | 20    | 2   | 4.5    | 117.48 | 42.19 | 0.36 | 56.96 | 79.68 | 31.5  | 11.73 |
| 500 | 71  | 7       | 712  | 712 | 11    | 2   | 3.9    | 91.34  | 40.52 | 0.44 | 53.66 | 77.82 | 32.12 | 11.6  |
| 500 | 72  | 7       | 722  | 722 | 12    | 2   | 4.43   | 81.1   | 36.27 | 0.45 | 57.33 | 82.96 | 27.47 | 11.94 |
| 500 | 73  | 7       | 732  | 732 | 13    | 2   | 4.73   | 61.97  | 28.33 | 0.46 | 54.29 | 79.3  | 31.43 | 11.49 |
| 500 | 74  | 7       | 742  | 742 | 14    | 2   | 4.17   | 65.95  | 23.28 | 0.35 | 59.47 | 81.75 | 20.16 | 15.39 |
| 500 | 75  | 7       | 752  | 752 | 15    | 2   | 4.3    | 68.36  | 30.22 | 0.44 | 56.45 | 82.52 | 29.63 | 12.81 |
| 500 | 76  | 7       | 762  | 762 | 16    | 2   | 4.33   | 78.83  | 33.02 | 0.42 | 50.27 | 75.54 | 32.91 | 8.87  |
| 500 | 77  | 7       | 772  | 772 | 17    | 2   | 3.67   | 44.5   | 17.04 | 0.38 | 58.13 | 83.86 | 26.38 | 14.54 |
| 500 | 78  | 7       | 782  | 782 | 18    | 2   | 4.77   | 115.14 | 43.64 | 0.38 | 56.68 | 81.09 | 28.23 | 12.8  |
| 500 | 79  | 7       | 792  | 792 | 19    | 2   | 3.5    | 75.32  | 31.91 | 0.42 | 52.07 | 79.17 | 33.05 | 10.32 |

**Table S2** Continued.

| Cut | Gen | Cut.Rep | Plot | Int  | Block | Rep | Height | GB     | DB    | DM   | ADF   | NDF   | DIG   | LIG   |
|-----|-----|---------|------|------|-------|-----|--------|--------|-------|------|-------|-------|-------|-------|
| 500 | 80  | 7       | 802  | 802  | 20    | 2   | 4.67   | 104    | 41.45 | 0.4  | 54    | 79.95 | 32.62 | 10.98 |
| 500 | 81  | 7       | 812  | 812  | 11    | 2   | 4.77   | 97     | 44.79 | 0.46 | 58.79 | 84.42 | 29.43 | 12.66 |
| 500 | 82  | 7       | 822  | 822  | 12    | 2   | 4.4    | 52.61  | 24.26 | 0.46 | 57.42 | 82.38 | 28.9  | 11.92 |
| 500 | 83  | 7       | 832  | 832  | 13    | 2   | 3.83   | 67.83  | 25.53 | 0.38 | 57.5  | 83.25 | 29.69 | 12.01 |
| 500 | 84  | 7       | 842  | 842  | 14    | 2   | 4.03   | 85.23  | 37.89 | 0.45 | 55.44 | 81.8  | 27.58 | 12.35 |
| 500 | 85  | 7       | 852  | 852  | 15    | 2   | 4      | 45.6   | 20.24 | 0.44 | 60.11 | 85.87 | 25.17 | 13.74 |
| 500 | 86  | 7       | 862  | 862  | 16    | 2   | 3.67   | 73     | 32.39 | 0.44 | 53.79 | 81.02 | 33.26 | 10.92 |
| 500 | 87  | 7       | 872  | 872  | 17    | 2   | 4.17   | 63.06  | 22.14 | 0.35 | 58.97 | 82.86 | 24.7  | 13.87 |
| 500 | 88  | 7       | 882  | 882  | 18    | 2   | 4.53   | 101.14 | 37.16 | 0.37 | 52.29 | 78.62 | 31.56 | 11.31 |
| 500 | 89  | 7       | 892  | 892  | 19    | 2   | 3.77   | 73     | 28.99 | 0.4  | 57.49 | 82.39 | 29.94 | 12.82 |
| 500 | 90  | 7       | 902  | 902  | 20    | 2   | 3.6    | 63.74  | 22.1  | 0.35 | 52.45 | 79.41 | 33.95 | 11.55 |
| 500 | 91  | 7       | 912  | 912  | 11    | 2   | 4.27   | 20.9   | 8.28  | 0.4  | 51.97 | 79.01 | 28.25 | 11.86 |
| 500 | 92  | 7       | 922  | 922  | 12    | 2   | 4.73   | 77.51  | 29.71 | 0.38 | 48.36 | 76.88 | 32.93 | 10.28 |
| 500 | 93  | 7       | 932  | 932  | 13    | 2   | 4.43   | 95.35  | 36.75 | 0.39 | 53.85 | 77.95 | 31    | 12.46 |
| 500 | 94  | 7       | 942  | 942  | 14    | 2   | 4.43   | 50.98  | 18.82 | 0.37 | 49.97 | 76.45 | 34.09 | 10.22 |
| 500 | 95  | 7       | 952  | 952  | 15    | 2   | 4.8    | 152.97 | 61.41 | 0.4  | 52.2  | 77.44 | 30.96 | 10.77 |
| 500 | 96  | 7       | 962  | 962  | 16    | 2   | 4.77   | 77.9   | 29.89 | 0.38 | 53.8  | 78.63 | 33.73 | 10.23 |
| 500 | 97  | 7       | 972  | 972  | 17    | 2   | 4.5    | 94.93  | 35.74 | 0.38 | 52.35 | 75.85 | 29.38 | 10.77 |
| 500 | 98  | 7       | 982  | 982  | 18    | 2   | 4.6    | 59.46  | 23.78 | 0.4  | 52.86 | 79.86 | 33.71 | 11.02 |
| 500 | 99  | 7       | 992  | 992  | 19    | 2   | 3.23   | 48.11  | 19.14 | 0.4  | 51.56 | 77.81 | 34.21 | 10.31 |
| 500 | 100 | 7       | 1002 | 1002 | 20    | 2   | 4.5    | 52.61  | 15.75 | 0.3  | 50.06 | 76.75 | 35.29 | 9.25  |
| 815 | 1   | 8       | 12   | 13   | 11    | 2   | 3.57   | 67.38  | 26.95 | 0.4  | 52.76 | 80.63 | 43.8  | 8.4   |
| 815 | 2   | 8       | 22   | 23   | 12    | 2   | 3.57   | 92.47  | 35.14 | 0.38 | 49.25 | 76.68 | 35.74 | 8.92  |
| 815 | 3   | 8       | 32   | 33   | 13    | 2   | 3.5    | 56.67  | 18.66 | 0.33 | 46.41 | 75.21 | 36.51 | 8.23  |
| 815 | 4   | 8       | 42   | 43   | 14    | 2   | 3.6    | 59.31  | 21.98 | 0.37 | 51.81 | 80.91 | 35.26 | 9.26  |
| 815 | 5   | 8       | 52   | 53   | 15    | 2   | 3.37   | 51.24  | 18.75 | 0.37 | 53.53 | 81.61 | 33.57 | 9.4   |
| 815 | 6   | 8       | 62   | 63   | 16    | 2   | 3.87   | 39.51  | 14.05 | 0.36 | 52.94 | 82.1  | 31.44 | 8.68  |
| 815 | 7   | 8       | 72   | 73   | 17    | 2   | 3.5    | 54.29  | 20.42 | 0.38 | 52.44 | 79.15 | 30.19 | 10.13 |
| 815 | 8   | 8       | 82   | 83   | 18    | 2   | 3.43   | 36.04  | 13.24 | 0.37 | 51.52 | 79.17 | 36.86 | 9.19  |
| 815 | 9   | 8       | 92   | 93   | 19    | 2   | 3.47   | 52.57  | 21.03 | 0.4  | 51.47 | 79.6  | 37.21 | 9.03  |
| 815 | 10  | 8       | 102  | 103  | 20    | 2   | 3.63   | 70.97  | 20.01 | 0.28 | 49.9  | 76.06 | 36    | 8.48  |

**Table S2** Continued.

| Cut | Gen | Cut.Rep | Plot | Int | Block | Rep | Height | GB    | DB    | DM   | ADF   | NDF   | DIG   | LIG   |
|-----|-----|---------|------|-----|-------|-----|--------|-------|-------|------|-------|-------|-------|-------|
| 815 | 11  | 8       | 112  | 113 | 11    | 2   | 3.7    | 50.86 | 17.76 | 0.35 | 49.77 | 77.77 | 34.39 | 8.34  |
| 815 | 12  | 8       | 122  | 123 | 12    | 2   | 3.57   | 41.33 | 15.38 | 0.37 | 49.39 | 77.34 | 37.02 | 8.35  |
| 815 | 13  | 8       | 132  | 133 | 13    | 2   | 3.37   | 45.21 | 14.63 | 0.32 | 53.1  | 81.68 | 35.51 | 9.37  |
| 815 | 14  | 8       | 142  | 143 | 14    | 2   | 3.43   | 46.44 | 14.79 | 0.32 | 48.97 | 76.83 | 38.83 | 7.95  |
| 815 | 15  | 8       | 152  | 153 | 15    | 2   | 3.43   | 32.76 | 11.19 | 0.34 | 51.85 | 79.17 | 30.68 | 10.15 |
| 815 | 16  | 8       | 162  | 163 | 16    | 2   | 3.63   | 59.43 | 18.76 | 0.32 | 53.15 | 79.42 | 29.56 | 10.7  |
| 815 | 17  | 8       | 172  | 173 | 17    | 2   | 3.6    | 29.79 | 10.13 | 0.34 | 52.49 | 80.66 | 31.89 | 9.03  |
| 815 | 18  | 8       | 182  | 183 | 18    | 2   | 3.4    | 70.86 | 21.08 | 0.3  | 49.29 | 77.39 | 37.22 | 8.25  |
| 815 | 19  | 8       | 192  | 193 | 19    | 2   | 3.47   | 47.62 | 15.8  | 0.33 | 49.1  | 76.9  | 39.15 | 8.03  |
| 815 | 20  | 8       | 202  | 203 | 20    | 2   | 3.57   | 67.62 | 18.88 | 0.28 | 51.66 | 79.57 | 39.32 | 8.71  |
| 815 | 21  | 8       | 212  | 213 | 11    | 2   | 3.6    | 85.9  | 27.71 | 0.32 | 51.39 | 79.44 | 34.99 | 8.9   |
| 815 | 22  | 8       | 222  | 223 | 12    | 2   | 3.1    | 42.42 | 16.91 | 0.4  | 55.83 | 82.54 | 25.5  | 11.36 |
| 815 | 23  | 8       | 232  | 233 | 13    | 2   | 3.57   | 43.22 | 13.46 | 0.31 | 52.88 | 80.47 | 28.9  | 10.86 |
| 815 | 24  | 8       | 242  | 243 | 14    | 2   | 3.2    | 49.33 | 14.59 | 0.3  | 49.57 | 78.64 | 32.71 | 8.44  |
| 815 | 25  | 8       | 252  | 253 | 15    | 2   | 3.03   | 48.13 | 18.42 | 0.38 | 54.64 | 80.93 | 27.81 | 10.99 |
| 815 | 26  | 8       | 262  | 263 | 16    | 2   | 3.03   | 41.6  | 13.93 | 0.33 | 50.42 | 78.22 | 33.48 | 8.96  |
| 815 | 27  | 8       | 272  | 273 | 17    | 2   | 3.6    | 40.19 | 17.33 | 0.43 | 49.88 | 77.48 | 32.38 | 7.96  |
| 815 | 28  | 8       | 282  | 283 | 18    | 2   | 3.23   | 40.38 | 14.91 | 0.37 | 50.89 | 77.87 | 35.88 | 9.21  |
| 815 | 29  | 8       | 292  | 293 | 19    | 2   | 3.7    | 79.18 | 29.7  | 0.38 | 53.09 | 79.81 | 33.06 | 9.5   |
| 815 | 30  | 8       | 302  | 303 | 20    | 2   | 2.93   | 32    | 10.56 | 0.33 | 53.56 | 81.75 | 31.57 | 9.71  |
| 815 | 31  | 8       | 312  | 313 | 11    | 2   | 3.67   | 31.67 | 11.85 | 0.37 | 52.05 | 79.27 | 32.43 | 9.97  |
| 815 | 32  | 8       | 322  | 323 | 12    | 2   | 3.73   | 62.29 | 23.55 | 0.38 | 50.71 | 78.02 | 24.69 | 9.66  |
| 815 | 33  | 8       | 332  | 333 | 13    | 2   | 3.43   | 56.77 | 20.13 | 0.35 | 49.96 | 78.29 | 30.91 | 9.57  |
| 815 | 34  | 8       | 342  | 343 | 14    | 2   | 2.97   | 28.85 | 10.09 | 0.35 | 50.15 | 77.73 | 33.48 | 8.86  |
| 815 | 35  | 8       | 352  | 353 | 15    | 2   | 3.7    | 29.58 | 10.27 | 0.35 | 50.3  | 77.73 | 34.11 | 10.02 |
| 815 | 36  | 8       | 362  | 363 | 16    | 2   | 3.9    | 88.95 | 23.46 | 0.26 | 51.09 | 78.94 | 37.14 | 9.43  |
| 815 | 37  | 8       | 372  | 373 | 17    | 2   | 3.53   | 65    | 21.44 | 0.33 | 52.35 | 81    | 32.48 | 9.37  |
| 815 | 38  | 8       | 382  | 383 | 18    | 2   | 3.17   | 36.25 | 12.89 | 0.36 | 54.25 | 82.25 | 31.11 | 10.15 |
| 815 | 39  | 8       | 392  | 393 | 19    | 2   | 3.47   | 57.5  | 20.18 | 0.35 | 50.91 | 80.85 | 37.32 | 9.05  |
| 815 | 40  | 8       | 402  | 403 | 20    | 2   | 3.67   | 72.82 | 20.56 | 0.28 | 47.27 | 78.16 | 41.8  | 7.87  |
| 815 | 41  | 8       | 412  | 413 | 11    | 2   | 3.73   | 84    | 31.69 | 0.38 | 49.41 | 78.59 | 33.39 | 8.98  |



**Table S2** Continued.

| Cut | Gen | Cut.Rep | Plot | Int | Block | Rep | Height | GB    | DB    | DM   | ADF   | NDF   | DIG   | LIG   |
|-----|-----|---------|------|-----|-------|-----|--------|-------|-------|------|-------|-------|-------|-------|
| 815 | 42  | 8       | 422  | 423 | 12    | 2   | 3.5    | 57.14 | 20.8  | 0.36 | 47.57 | 75.64 | 36.1  | 7.54  |
| 815 | 43  | 8       | 432  | 433 | 13    | 2   | 3.2    | 39.62 | 16.3  | 0.41 | 51.86 | 81.85 | 29.88 | 9.5   |
| 815 | 44  | 8       | 442  | 443 | 14    | 2   | 3.37   | 76.88 | 31.81 | 0.41 | 50.84 | 79.54 | 28.72 | 9.14  |
| 815 | 45  | 8       | 452  | 453 | 15    | 2   | 3.6    | 45.13 | 13.49 | 0.3  | 48.52 | 75.66 | 36.03 | 8.56  |
| 815 | 46  | 8       | 462  | 463 | 16    | 2   | 3.33   | 20.65 | 6.68  | 0.32 | 45.7  | 74.45 | 34.24 | 8.24  |
| 815 | 47  | 8       | 472  | 473 | 17    | 2   | 3.77   | 93.75 | 34.18 | 0.36 | 52.47 | 80.76 | 31.51 | 9.36  |
| 815 | 48  | 8       | 482  | 483 | 18    | 2   | 3.97   | 76.19 | 23.08 | 0.3  | 49.32 | 78.07 | 37.27 | 9.23  |
| 815 | 49  | 8       | 492  | 493 | 19    | 2   | 2.1    | 16.32 | 4.41  | 0.27 | 44.75 | 74.54 | 47.24 | 6.54  |
| 815 | 50  | 8       | 502  | 503 | 20    | 2   | 3.7    | 54.81 | 19.85 | 0.36 | 53.78 | 81.13 | 31.87 | 9.98  |
| 815 | 51  | 8       | 512  | 513 | 11    | 2   | 3.57   | 72.12 | 24.73 | 0.34 | 47.09 | 76.41 | 43.1  | 7.62  |
| 815 | 52  | 8       | 522  | 523 | 12    | 2   | 3.57   | 72.95 | 24.77 | 0.34 | 48.99 | 78.89 | 38.17 | 8.7   |
| 815 | 53  | 8       | 532  | 533 | 13    | 2   | 3.53   | 90.46 | 33.65 | 0.37 | 48.82 | 78.12 | 35.32 | 8.91  |
| 815 | 54  | 8       | 542  | 543 | 14    | 2   | 3.73   | 91.58 | 31.21 | 0.34 | 50.55 | 78.47 | 32.63 | 8.3   |
| 815 | 55  | 8       | 552  | 553 | 15    | 2   | 3.73   | 97.14 | 36.07 | 0.37 | 50.84 | 78.59 | 27.34 | 9.25  |
| 815 | 56  | 8       | 562  | 563 | 16    | 2   | 3.8    | 46.06 | 13.51 | 0.29 | 52.32 | 80.74 | 42.16 | 9.8   |
| 815 | 57  | 8       | 572  | 573 | 17    | 2   | 3.57   | 54.34 | 19.91 | 0.37 | 51.52 | 79.72 | 32.6  | 9.52  |
| 815 | 58  | 8       | 582  | 583 | 18    | 2   | 3.4    | 64.9  | 18.94 | 0.29 | 47.73 | 78.24 | 39.04 | 7.24  |
| 815 | 59  | 8       | 592  | 593 | 19    | 2   | 3.5    | 60.53 | 23.46 | 0.39 | 51.37 | 80.51 | 32.95 | 9.1   |
| 815 | 60  | 8       | 602  | 603 | 20    | 2   | 3.57   | 47.36 | 15.86 | 0.33 | 49.6  | 80.07 | 34.22 | 9.63  |
| 815 | 61  | 8       | 612  | 613 | 11    | 2   | 3.13   | 39.56 | 12.51 | 0.32 | 45.6  | 74.16 | 46.6  | 6.59  |
| 815 | 62  | 8       | 622  | 623 | 12    | 2   | 2.77   | 27.3  | 10.35 | 0.38 | 52.03 | 78.64 | 30    | 8.88  |
| 815 | 63  | 8       | 632  | 633 | 13    | 2   | 3.57   | 51.2  | 18.02 | 0.35 | 49.71 | 77.92 | 39.72 | 7.99  |
| 815 | 64  | 8       | 642  | 643 | 14    | 2   | 3.43   | 56.38 | 17.77 | 0.32 | 50.74 | 79.04 | 30.38 | 9.01  |
| 815 | 65  | 8       | 652  | 653 | 15    | 2   | 3.1    | 33.13 | 11.78 | 0.36 | 50.54 | 78.74 | 26.78 | 10.08 |
| 815 | 66  | 8       | 662  | 663 | 16    | 2   | 3.4    | 29.88 | 10.72 | 0.36 | 52.12 | 80.64 | 31.96 | 8.98  |
| 815 | 67  | 8       | 672  | 673 | 17    | 2   | 3.5    | 48.33 | 19.72 | 0.41 | 49.62 | 77.83 | 33.72 | 9.97  |
| 815 | 68  | 8       | 682  | 683 | 18    | 2   | 3.7    | 44.15 | 12.65 | 0.29 | 54.1  | 80.67 | 30.15 | 9.63  |
| 815 | 69  | 8       | 692  | 693 | 19    | 2   | 3.6    | 66.67 | 24.75 | 0.37 | 53.51 | 80.64 | 32.56 | 10.25 |
| 815 | 70  | 8       | 702  | 703 | 20    | 2   | 3.77   | 88.57 | 25.65 | 0.29 | 50.79 | 81.06 | 42.58 | 8     |
| 815 | 71  | 8       | 712  | 713 | 11    | 2   | 2.87   | 42.63 | 15.28 | 0.36 | 50.31 | 77.28 | 30.3  | 8.95  |
| 815 | 72  | 8       | 722  | 723 | 12    | 2   | 3.43   | 75    | 28.5  | 0.38 | NA    | NA    | NA    | NA    |

**Table S2** Continued.

| Cut  | Gen | Cut.Rep | Plot | Int  | Block | Rep | Height | GB    | DB    | DM   | ADF   | NDF   | DIG   | LIG   |
|------|-----|---------|------|------|-------|-----|--------|-------|-------|------|-------|-------|-------|-------|
| 815  | 73  | 8       | 732  | 733  | 13    | 2   | 3.5    | 71.18 | 25.63 | 0.36 | 53.28 | 81.47 | 33.56 | 9.83  |
| 815  | 74  | 8       | 742  | 743  | 14    | 2   | 3.73   | 39.6  | 12.6  | 0.32 | 53.27 | 78.86 | 25.83 | 11.2  |
| 815  | 75  | 8       | 752  | 753  | 15    | 2   | 3.47   | 55.24 | 21.47 | 0.39 | 53.12 | 82.03 | 28.75 | 10.11 |
| 815  | 76  | 8       | 762  | 763  | 16    | 2   | 3.53   | 58.1  | 23.4  | 0.4  | 46.29 | 74.42 | 30.28 | 7.93  |
| 815  | 77  | 8       | 772  | 773  | 17    | 2   | 3      | 49.79 | 18.6  | 0.37 | 51.55 | 79.74 | 37.71 | 9.87  |
| 815  | 78  | 8       | 782  | 783  | 18    | 2   | 3.9    | 88.57 | 24.35 | 0.27 | 52.04 | 81.25 | 30.7  | 9.61  |
| 815  | 79  | 8       | 792  | 793  | 19    | 2   | 3.43   | 69.9  | 25.3  | 0.36 | 50.97 | 80.84 | 37.34 | 8.7   |
| 815  | 80  | 8       | 802  | 803  | 20    | 2   | 3.53   | 63.66 | 22.4  | 0.35 | 51.68 | 80.11 | 37.65 | 9.78  |
| 815  | 81  | 8       | 812  | 813  | 11    | 2   | 3.13   | 54.48 | 20.55 | 0.38 | 49.18 | 77.51 | 34.6  | 8.89  |
| 815  | 82  | 8       | 822  | 823  | 12    | 2   | 3.5    | 52.38 | 20.03 | 0.38 | 48.41 | 77.26 | 35.01 | 8.22  |
| 815  | 83  | 8       | 832  | 833  | 13    | 2   | 3.6    | 85.14 | 26.26 | 0.31 | 49.8  | 77.65 | 37.59 | 9.41  |
| 815  | 84  | 8       | 842  | 843  | 14    | 2   | 3.37   | 64.76 | 26.58 | 0.41 | 52.55 | 80.58 | 32.47 | 9.41  |
| 815  | 85  | 8       | 852  | 853  | 15    | 2   | 3.53   | 35.8  | 14.13 | 0.39 | 51.96 | 80.34 | 25.44 | 9.38  |
| 815  | 86  | 8       | 862  | 863  | 16    | 2   | 3.23   | 45.11 | 17.43 | 0.39 | 49.37 | 77.83 | 36.08 | 8.04  |
| 815  | 87  | 8       | 872  | 873  | 17    | 2   | 3.67   | 28.19 | 9.35  | 0.33 | 50.97 | 77.13 | 33.02 | 10.11 |
| 815  | 88  | 8       | 882  | 883  | 18    | 2   | 3.87   | 80.38 | 25.99 | 0.32 | 52.78 | 80.7  | 31.31 | 10.21 |
| 815  | 89  | 8       | 892  | 893  | 19    | 2   | 3.5    | 77.33 | 30.33 | 0.39 | 51.01 | 79.2  | 34.22 | 9.34  |
| 815  | 90  | 8       | 902  | 903  | 20    | 2   | 3.5    | 53.71 | 19.01 | 0.35 | 49.75 | 78.31 | 38.7  | 8.12  |
| 815  | 91  | 8       | 912  | 913  | 11    | 2   | 1.7    | 32.35 | 10.64 | 0.33 | 48.22 | 74.64 | 35.66 | 9.38  |
| 815  | 92  | 8       | 922  | 923  | 12    | 2   | 3.63   | 76.19 | 21.66 | 0.28 | 48.07 | 76.77 | 36.56 | 8.67  |
| 815  | 93  | 8       | 932  | 933  | 13    | 2   | 4.17   | 93.07 | 31.33 | 0.34 | 50.29 | 77.55 | 38.88 | 9.49  |
| 815  | 94  | 8       | 942  | 943  | 14    | 2   | 3.87   | 42.08 | 15.25 | 0.36 | 49.77 | 77.49 | 37.85 | 9.13  |
| 815  | 95  | 8       | 952  | 953  | 15    | 2   | 4.13   | 96.76 | 26.97 | 0.28 | 51.48 | 79.77 | 33.47 | 8.72  |
| 815  | 96  | 8       | 962  | 963  | 16    | 2   | 3.67   | 61.04 | 20.94 | 0.34 | 51.31 | 79.42 | 36.9  | 9.16  |
| 815  | 97  | 8       | 972  | 973  | 17    | 2   | 3.8    | 57.52 | 21.47 | 0.37 | 51.04 | 80.96 | 32.07 | 9.22  |
| 815  | 98  | 8       | 982  | 983  | 18    | 2   | 3.63   | 57.87 | 21.47 | 0.37 | 52.85 | 81.78 | 30.44 | 10.16 |
| 815  | 99  | 8       | 992  | 993  | 19    | 2   | 2.57   | 20.31 | 7     | 0.34 | 49.99 | 78.07 | 39.6  | 8.41  |
| 815  | 100 | 8       | 1002 | 1003 | 20    | 2   | 2.63   | 20.65 | 5.84  | 0.28 | 0     | 73.42 | 45.27 | 5.75  |
| 1405 | 1   | 9       | 12   | 14   | 11    | 2   | 2.2    | 49.33 | 18.09 | 0.37 | 48.77 | 80.03 | 38.76 | 8.77  |
| 1405 | 2   | 9       | 22   | 24   | 12    | 2   | 3      | 92.22 | 32.06 | 0.35 | 51.86 | 80.81 | 36.58 | 10.19 |
| 1405 | 3   | 9       | 32   | 34   | 13    | 2   | 2.5    | 66.67 | 24.88 | 0.37 | 48.2  | 79.05 | 39.04 | 9.25  |

**Table S2** Continued.

| Cut  | Gen | Cut.Rep | Plot | Int | Block | Rep | Height | GB    | DB    | DM   | ADF   | NDF   | DIG   | LIG   |
|------|-----|---------|------|-----|-------|-----|--------|-------|-------|------|-------|-------|-------|-------|
| 1405 | 4   | 9       | 42   | 44  | 14    | 2   | 2.4    | 53.33 | 13.6  | 0.26 | NA    | NA    | NA    | NA    |
| 1405 | 5   | 9       | 52   | 54  | 15    | 2   | 2.4    | 36.44 | 15.78 | 0.43 | 47.17 | 79.3  | 41.49 | 8.32  |
| 1405 | 6   | 9       | 62   | 64  | 16    | 2   | 2.4    | 13.78 | 3.54  | 0.26 | 48.39 | 78.89 | 40.32 | 7.9   |
| 1405 | 7   | 9       | 72   | 74  | 17    | 2   | 2.5    | 50.67 | 22.15 | 0.44 | 47.95 | 73.83 | 40.2  | 9.25  |
| 1405 | 8   | 9       | 82   | 84  | 18    | 2   | 2.2    | 19.56 | 7.43  | 0.38 | 45.05 | 74.41 | 42.67 | 7.13  |
| 1405 | 9   | 9       | 92   | 94  | 19    | 2   | 2.1    | 32.44 | 14.93 | 0.46 | 46.47 | 75.57 | 40.29 | 7.46  |
| 1405 | 10  | 9       | 102  | 104 | 20    | 2   | 3.2    | 57.78 | 23.92 | 0.41 | 42.5  | 73.43 | 42.29 | 6.14  |
| 1405 | 11  | 9       | 112  | 114 | 11    | 2   | 2.5    | 74    | 27.26 | 0.37 | 50.69 | 79.4  | 38.34 | 9.04  |
| 1405 | 12  | 9       | 122  | 124 | 12    | 2   | 2.7    | 38.22 | 14.84 | 0.39 | 49.63 | 79.75 | 38.37 | 9.44  |
| 1405 | 13  | 9       | 132  | 134 | 13    | 2   | 2.3    | 38.22 | 16.02 | 0.42 | 55.05 | 84.6  | 32.31 | 11.08 |
| 1405 | 14  | 9       | 142  | 144 | 14    | 2   | 1.6    | 31.56 | 14.21 | 0.45 | 46.44 | 78.94 | 41.83 | 7.73  |
| 1405 | 15  | 9       | 152  | 154 | 15    | 2   | 1.6    | 26    | 8.02  | 0.31 | 48.43 | 78.33 | 41.38 | 8.68  |
| 1405 | 16  | 9       | 162  | 164 | 16    | 2   | 3      | 66    | 17.62 | 0.27 | NA    | NA    | NA    | NA    |
| 1405 | 17  | 9       | 172  | 174 | 17    | 2   | 2.4    | 39.33 | 13.43 | 0.34 | 47.36 | 75.68 | 40.49 | 8.79  |
| 1405 | 18  | 9       | 182  | 184 | 18    | 2   | 2.3    | 55.56 | 17.04 | 0.31 | 47.7  | 76.16 | 43.61 | 7.2   |
| 1405 | 19  | 9       | 192  | 194 | 19    | 2   | 1.7    | 48.89 | 18.8  | 0.38 | 46.94 | 75.76 | 38.7  | 7.87  |
| 1405 | 20  | 9       | 202  | 204 | 20    | 2   | 2.3    | 36.44 | 15.27 | 0.42 | 51.01 | 77.86 | 36.75 | 8.99  |
| 1405 | 21  | 9       | 212  | 214 | 11    | 2   | 1.9    | 80    | 32.95 | 0.41 | 50.07 | 79.24 | 38.3  | 9.36  |
| 1405 | 22  | 9       | 222  | 224 | 12    | 2   | 2.1    | 33.78 | 11.1  | 0.33 | 50.63 | 79.98 | 37.06 | 9.51  |
| 1405 | 23  | 9       | 232  | 234 | 13    | 2   | 2.3    | 33.33 | 9.21  | 0.28 | 53.66 | 77.07 | 33.69 | 10.84 |
| 1405 | 24  | 9       | 242  | 244 | 14    | 2   | 2.1    | 19.56 | 5.64  | 0.29 | 48.38 | 76.35 | 40.11 | 8.87  |
| 1405 | 25  | 9       | 252  | 254 | 15    | 2   | 2.1    | 34.67 | 15.04 | 0.43 | 48.92 | 78.72 | 37.27 | 9.67  |
| 1405 | 26  | 9       | 262  | 264 | 16    | 2   | 2.4    | 94    | 25.5  | 0.27 | 52.1  | 79.9  | 38.73 | 8.49  |
| 1405 | 27  | 9       | 272  | 274 | 17    | 2   | 2.6    | 59.56 | 26.23 | 0.44 | 48.31 | 77.54 | 40.53 | 7.72  |
| 1405 | 28  | 9       | 282  | 284 | 18    | 2   | 2.1    | 22.67 | 8.08  | 0.36 | 47.81 | 76.73 | 41.14 | 8.19  |
| 1405 | 29  | 9       | 292  | 294 | 19    | 2   | 2.4    | 48.89 | 25.44 | 0.52 | 49.34 | 76.93 | 40.48 | 7.71  |
| 1405 | 30  | 9       | 302  | 304 | 20    | 2   | 2.4    | 22.22 | 9.34  | 0.42 | 46.2  | 73.87 | 41.16 | 7.73  |
| 1405 | 31  | 9       | 312  | 314 | 11    | 2   | 2.3    | 29.33 | 8.04  | 0.27 | 46.71 | 75.51 | 45.07 | 6.15  |
| 1405 | 32  | 9       | 322  | 324 | 12    | 2   | 2.5    | 35.11 | 11.93 | 0.34 | 49.07 | 76.28 | 37.8  | 9.29  |
| 1405 | 33  | 9       | 332  | 334 | 13    | 2   | 3      | 76    | 27.27 | 0.36 | 51.61 | 81.95 | 33.17 | 10.46 |
| 1405 | 34  | 9       | 342  | 344 | 14    | 2   | 2.4    | 15.11 | 6.88  | 0.46 | 45.99 | 75.96 | 40.86 | 8.14  |

**Table S2** Continued.

| Cut  | Gen | Cut.Rep | Plot | Int | Block | Rep | Height | GB    | DB    | DM   | ADF   | NDF   | DIG   | LIG   |
|------|-----|---------|------|-----|-------|-----|--------|-------|-------|------|-------|-------|-------|-------|
| 1405 | 35  | 9       | 352  | 354 | 15    | 2   | 2.3    | 16.44 | 5.11  | 0.31 | 45.67 | 75.58 | 42.6  | 7.83  |
| 1405 | 36  | 9       | 362  | 364 | 16    | 2   | 3      | 57.78 | 17.94 | 0.31 | 45.48 | 74.01 | 42.65 | 6.94  |
| 1405 | 37  | 9       | 372  | 374 | 17    | 2   | 2.4    | 40    | 17.13 | 0.43 | 50.46 | 79.36 | 37.31 | 9.17  |
| 1405 | 38  | 9       | 382  | 384 | 18    | 2   | 2.1    | 37.56 | 14.87 | 0.4  | 48.93 | 79.15 | 42.43 | 7.39  |
| 1405 | 39  | 9       | 392  | 394 | 19    | 2   | 3      | 46.67 | 19.23 | 0.41 | 50.08 | 79.19 | 38.81 | 9.51  |
| 1405 | 40  | 9       | 402  | 404 | 20    | 2   | 3      | 65.56 | 27.52 | 0.42 | 50.79 | 78.07 | 39.35 | 9.39  |
| 1405 | 41  | 9       | 412  | 414 | 11    | 2   | 2.4    | 45.56 | 15.59 | 0.39 | 48.49 | 79.47 | 38.92 | 9.07  |
| 1405 | 42  | 9       | 422  | 424 | 12    | 2   | 2.5    | 42.67 | 14.03 | 0.33 | 51.35 | 81.39 | 38.3  | 9.67  |
| 1405 | 43  | 9       | 432  | 434 | 13    | 2   | 2.45   | 45.78 | 17.89 | 0.39 | 47.2  | 79.91 | 41.1  | 8.1   |
| 1405 | 44  | 9       | 442  | 444 | 14    | 2   | 2.3    | 65.56 | 32.02 | 0.49 | 42.14 | 72.19 | 42.47 | 6.66  |
| 1405 | 45  | 9       | 452  | 454 | 15    | 2   | 2.5    | 27.56 | 7.85  | 0.29 | 47.42 | 77.51 | 44.17 | 7.34  |
| 1405 | 46  | 9       | 462  | 464 | 16    | 2   | 2.5    | 25.78 | 10.93 | 0.42 | 50.41 | 82.76 | 37.32 | 9.08  |
| 1405 | 47  | 9       | 472  | 474 | 17    | 2   | 2.2    | 66.44 | 25.55 | 0.38 | 49.9  | 80.64 | 41.38 | 8.3   |
| 1405 | 48  | 9       | 482  | 484 | 18    | 2   | 2.9    | 28.44 | 7.01  | 0.25 | 43.46 | 72.62 | 45.44 | 6.03  |
| 1405 | 49  | 9       | 492  | 494 | 19    | 2   | 0.9    | 6.22  | 2.18  | 0.35 | 40.23 | 68.9  | 50.64 | 4.74  |
| 1405 | 50  | 9       | 502  | 504 | 20    | 2   | 3      | 33.33 | 7.72  | 0.23 | 48.65 | 76.92 | 46.72 | 6.26  |
| 1405 | 51  | 9       | 512  | 514 | 11    | 2   | 2.6    | 60.22 | 13.19 | 0.26 | 53.74 | 82.39 | 37    | 10.4  |
| 1405 | 52  | 9       | 522  | 524 | 12    | 2   | 3      | 36.44 | 13.73 | 0.38 | 52.11 | 81.87 | 35.14 | 10.7  |
| 1405 | 53  | 9       | 532  | 534 | 13    | 2   | 3.1    | 60    | 22.32 | 0.37 | NA    | NA    | NA    | NA    |
| 1405 | 54  | 9       | 542  | 544 | 14    | 2   | 3      | 37.78 | 14.45 | 0.38 | 48.28 | 77.78 | 38.3  | 8.52  |
| 1405 | 55  | 9       | 552  | 554 | 15    | 2   | 2.8    | 59.11 | 21.96 | 0.37 | 47.68 | 76.46 | 38.7  | 8.74  |
| 1405 | 56  | 9       | 562  | 564 | 16    | 2   | 2.4    | 32    | 11.27 | 0.35 | 51.06 | 78.93 | 36.09 | 9.5   |
| 1405 | 57  | 9       | 572  | 574 | 17    | 2   | 2.1    | 32.67 | 9.8   | 0.3  | 48.2  | 77.84 | 41.72 | 7.11  |
| 1405 | 58  | 9       | 582  | 584 | 18    | 2   | 3.2    | 60.22 | 20.13 | 0.33 | 47.57 | 77.6  | 46.83 | 6.18  |
| 1405 | 59  | 9       | 592  | 594 | 19    | 2   | 2.8    | 38.67 | 15.52 | 0.4  | 47.96 | 78.99 | 40.38 | 8.12  |
| 1405 | 60  | 9       | 602  | 604 | 20    | 2   | 1.9    | 20.44 | 7.92  | 0.39 | 48.22 | 78.04 | 39.74 | 8.86  |
| 1405 | 61  | 9       | 612  | 614 | 11    | 2   | 2.9    | 64    | 19.75 | 0.31 | 52.04 | 72.09 | 39.15 | 8.57  |
| 1405 | 62  | 9       | 622  | 624 | 12    | 2   | 2      | 26.22 | 10.04 | 0.38 | 47.5  | 78.16 | 40.27 | 7.73  |
| 1405 | 63  | 9       | 632  | 634 | 13    | 2   | 2.5    | 52.89 | 20.38 | 0.39 | 50.2  | 81.89 | 36.09 | 10.07 |
| 1405 | 64  | 9       | 642  | 644 | 14    | 2   | 2.1    | 48.89 | 18.81 | 0.38 | 45.34 | 73.6  | 39.3  | 7.22  |
| 1405 | 65  | 9       | 652  | 654 | 15    | 2   | NA     | 26.22 | 8.99  | 0.34 | 48.13 | 77.49 | 40.97 | 8.66  |

**Table S2** Continued.

| Cut  | Gen | Cut.Rep | Plot | Int | Block | Rep | Height | GB    | DB    | DM   | ADF   | NDF   | DIG   | LIG   |
|------|-----|---------|------|-----|-------|-----|--------|-------|-------|------|-------|-------|-------|-------|
| 1405 | 66  | 9       | 662  | 664 | 16    | 2   | 2.1    | 28    | 10.96 | 0.39 | 45.23 | 76.87 | 42.95 | 7.09  |
| 1405 | 67  | 9       | 672  | 674 | 17    | 2   | 2.7    | 44    | 16.73 | 0.38 | 49.13 | 79.36 | 39.65 | 8.55  |
| 1405 | 68  | 9       | 682  | 684 | 18    | 2   | 2.6    | 36    | 14.33 | 0.4  | 49.92 | 77.97 | 37.56 | 8.8   |
| 1405 | 69  | 9       | 692  | 694 | 19    | 2   | 2.6    | 36.89 | 18.08 | 0.49 | 49.14 | 77.92 | 38.59 | 8.59  |
| 1405 | 70  | 9       | 702  | 704 | 20    | 2   | 2.5    | 69.33 | 29.73 | 0.43 | 48.14 | 77.65 | 40.46 | 7.95  |
| 1405 | 71  | 9       | 712  | 714 | 11    | 2   | 1.8    | 33.33 | 9.63  | 0.29 | 52.58 | 71.19 | 37.58 | 9.62  |
| 1405 | 72  | 9       | 722  | 724 | 12    | 2   | 2.2    | 67.33 | 25.15 | 0.37 | 49.59 | 79.28 | 37.4  | 8.8   |
| 1405 | 73  | 9       | 732  | 734 | 13    | 2   | 2.3    | 77.33 | 27.34 | 0.35 | 47.03 | 76.33 | 43.42 | 7.74  |
| 1405 | 74  | 9       | 742  | 744 | 14    | 2   | 1.8    | 16    | 4.93  | 0.31 | 50.35 | 76.44 | 35.22 | 9.42  |
| 1405 | 75  | 9       | 752  | 754 | 15    | 2   | 2.3    | 58.22 | 20.63 | 0.35 | 48.96 | 79.21 | 40.07 | 8.04  |
| 1405 | 76  | 9       | 762  | 764 | 16    | 2   | 2.3    | 24.44 | 7.58  | 0.31 | 45.59 | 78.28 | 44.37 | 6.97  |
| 1405 | 77  | 9       | 772  | 774 | 17    | 2   | 2.7    | 18.67 | 6.12  | 0.33 | 50.59 | 79.9  | 37.02 | 9.57  |
| 1405 | 78  | 9       | 782  | 784 | 18    | 2   | 2.3    | 40.22 | 14.53 | 0.36 | 50.3  | 77.48 | 36.97 | 9.27  |
| 1405 | 79  | 9       | 792  | 794 | 19    | 2   | 1.8    | 52    | 15.48 | 0.3  | 46.47 | 74.52 | 44.09 | 6.5   |
| 1405 | 80  | 9       | 802  | 804 | 20    | 2   | 2.7    | 64.44 | 18.05 | 0.28 | 48.08 | 78.15 | 42.82 | 8.48  |
| 1405 | 81  | 9       | 812  | 814 | 11    | 2   | 2.3    | 64.67 | 20.25 | 0.31 | 50.39 | 79.91 | 36.71 | 9.45  |
| 1405 | 82  | 9       | 822  | 824 | 12    | 2   | 2.3    | 61.78 | 24.52 | 0.4  | 47.76 | 78.29 | 39.54 | 8.69  |
| 1405 | 83  | 9       | 832  | 834 | 13    | 2   | 2.4    | 45.67 | 15.62 | 0.34 | 47.88 | 77.87 | 40.53 | 7.73  |
| 1405 | 84  | 9       | 842  | 844 | 14    | 2   | 1.65   | 43.11 | 17.99 | 0.42 | 45    | 76.74 | 38.57 | 8.9   |
| 1405 | 85  | 9       | 852  | 854 | 15    | 2   | 2.5    | 23.56 | 10.4  | 0.44 | 46.97 | 79.16 | 39.52 | 8.2   |
| 1405 | 86  | 9       | 862  | 864 | 16    | 2   | 2.4    | 16.67 | 4.56  | 0.27 | 46.08 | 76.94 | 43.77 | 6.65  |
| 1405 | 87  | 9       | 872  | 874 | 17    | 2   | 2.8    | 44.44 | 14.7  | 0.33 | 51.32 | 79.3  | 37.98 | 9.69  |
| 1405 | 88  | 9       | 882  | 884 | 18    | 2   | 2.6    | 56    | 18.85 | 0.34 | 53.45 | 80.35 | 35.8  | 10.09 |
| 1405 | 89  | 9       | 892  | 894 | 19    | 2   | 1.6    | 50.44 | 22.7  | 0.45 | 47.35 | 74.94 | 40.28 | 8.5   |
| 1405 | 90  | 9       | 902  | 904 | 20    | 2   | 2.8    | 36.89 | 13.5  | 0.37 | 43.9  | 71.73 | 41.38 | 5.75  |
| 1405 | 91  | 9       | 912  | 914 | 11    | 2   | 2.2    | 3.33  | 1.09  | 0.33 | 51.36 | 79.72 | 36.53 | 10.27 |
| 1405 | 92  | 9       | 922  | 924 | 12    | 2   | 1.6    | 8.44  | 2.66  | 0.31 | 47.06 | 77.34 | 40.13 | 8.28  |
| 1405 | 93  | 9       | 932  | 934 | 13    | 2   | 3.3    | 59.56 | 22.14 | 0.37 | 50.74 | 76.08 | 38.16 | 9.61  |
| 1405 | 94  | 9       | 942  | 944 | 14    | 2   | 3.4    | 22.22 | 7.32  | 0.33 | 52.39 | 79.45 | 36.45 | 9.87  |
| 1405 | 95  | 9       | 952  | 954 | 15    | 2   | 3.7    | 63.33 | 23.24 | 0.37 | 49.24 | 80.19 | 39.34 | 8.37  |
| 1405 | 96  | 9       | 962  | 964 | 16    | 2   | 2.8    | 48.89 | 17.78 | 0.36 | 51.86 | 79.38 | 40.41 | 8.61  |

**Table S2** Continued.

| Cut  | Gen | Cut.Rep | Plot | Int  | Block | Rep | Height | GB      | DB     | DM    | ADF   | NDF   | DIG   | LIG   |
|------|-----|---------|------|------|-------|-----|--------|---------|--------|-------|-------|-------|-------|-------|
| 1405 | 97  | 9       | 972  | 974  | 17    | 2   | 2.6    | 38.44   | 13.55  | 0.35  | 47.18 | 76.53 | 39.05 | 8.14  |
| 1405 | 98  | 9       | 982  | 984  | 18    | 2   | NA     | NA      | NA     | NA    | NA    | NA    | NA    | NA    |
| 1405 | 99  | 9       | 992  | 994  | 19    | 2   | 2.7    | 6.67    | 2.01   | 0.3   | NA    | NA    | NA    | NA    |
| 1405 | 100 | 9       | 1002 | 1004 | 20    | 2   | 0.3    | 5       | 1.55   | 0.31  | NA    | NA    | NA    | NA    |
| 1615 | 1   | 10      | 12   | 15   | 11    | 2   | 3.4    | 90.933  | 30.919 | 0.34  | 42.93 | 77.33 | 42.17 | 9.55  |
| 1615 | 2   | 10      | 22   | 25   | 12    | 2   | 3.3    | 103.491 | 36.464 | 0.352 | 44.33 | 77.97 | 39.27 | 9.28  |
| 1615 | 3   | 10      | 32   | 35   | 13    | 2   | 3.5    | 60.8    | 20.523 | 0.338 | 43.2  | 75.88 | 40.25 | 8.8   |
| 1615 | 4   | 10      | 42   | 45   | 14    | 2   | 3.1    | 60.417  | 22.981 | 0.38  | 45.49 | 79.97 | 39.27 | 9.24  |
| 1615 | 5   | 10      | 52   | 55   | 15    | 2   | 3.3    | 31.111  | 11.432 | 0.367 | 45.63 | 78.9  | 37.24 | 8.85  |
| 1615 | 6   | 10      | 62   | 65   | 16    | 2   | 3.3    | 25.62   | 8.386  | 0.327 | 49.46 | 80.48 | 36.35 | 8.71  |
| 1615 | 7   | 10      | 72   | 75   | 17    | 2   | 3.2    | 41.111  | 15.415 | 0.375 | 48.62 | 80.78 | 36.26 | 9.81  |
| 1615 | 8   | 10      | 82   | 85   | 18    | 2   | 3.2    | 61.454  | 23.799 | 0.387 | 46.24 | 80.64 | 37.84 | 9.03  |
| 1615 | 9   | 10      | 92   | 95   | 19    | 2   | 3.3    | 34.444  | 13.237 | 0.384 | 44.76 | 78.88 | 40.43 | 9     |
| 1615 | 10  | 10      | 102  | 105  | 20    | 2   | 3.2    | 41.785  | 12.096 | 0.289 | 42.41 | 76.93 | 40.65 | 8.69  |
| 1615 | 11  | 10      | 112  | 115  | 11    | 2   | 3.2    | 52      | 17.408 | 0.335 | 44.27 | 79.46 | 44.41 | 8.75  |
| 1615 | 12  | 10      | 122  | 125  | 12    | 2   | 3.4    | 52.444  | 19.878 | 0.379 | 48.84 | 80.45 | 40.51 | 8.72  |
| 1615 | 13  | 10      | 132  | 135  | 13    | 2   | 3.6    | 68.217  | 25.416 | 0.373 | 46.86 | 81.08 | 39.32 | 9.29  |
| 1615 | 14  | 10      | 142  | 145  | 14    | 2   | 3.3    | 46.528  | 17.089 | 0.367 | 41.31 | 76.6  | 44.86 | 8.31  |
| 1615 | 15  | 10      | 152  | 155  | 15    | 2   | 3.2    | 22.444  | 6.951  | 0.31  | 52.53 | 80.25 | 32.96 | 10.43 |
| 1615 | 16  | 10      | 162  | 165  | 16    | 2   | 3.5    | 58.667  | 19.244 | 0.328 | 46.1  | 78.4  | 37.66 | 9.36  |
| 1615 | 17  | 10      | 172  | 175  | 17    | 2   | 3      | 26.337  | 9.87   | 0.375 | 47.73 | 80.56 | 36.11 | 9.83  |
| 1615 | 18  | 10      | 182  | 185  | 18    | 2   | 2.8    | 57.889  | 20.707 | 0.358 | 46.37 | 79.34 | 39.49 | 9.24  |
| 1615 | 19  | 10      | 192  | 195  | 19    | 2   | 3.8    | 44.889  | 14.98  | 0.334 | 46.88 | 79.46 | 40.54 | 8.8   |
| 1615 | 20  | 10      | 202  | 205  | 20    | 2   | 3.4    | 44.444  | 14.528 | 0.327 | 45.67 | 79.15 | 39.16 | 9.3   |
| 1615 | 21  | 10      | 212  | 215  | 11    | 2   | 3.4    | 57.556  | 21.365 | 0.371 | 44.63 | 80.08 | 39.38 | 9.21  |
| 1615 | 22  | 10      | 222  | 225  | 12    | 2   | 2.8    | 34.796  | 14.096 | 0.405 | 40.2  | 75.58 | 41.07 | 8.93  |
| 1615 | 23  | 10      | 232  | 235  | 13    | 2   | 2.4    | 8.681   | 3.081  | 0.355 | 45.06 | 78.23 | 34.16 | 11.74 |
| 1615 | 24  | 10      | 242  | 245  | 14    | 2   | 3.6    | 28.444  | 9.7    | 0.341 | 42.23 | 77.06 | 40.95 | 9.23  |
| 1615 | 25  | 10      | 252  | 255  | 15    | 2   | 3.5    | 47.188  | 15.842 | 0.336 | 50.16 | 81.03 | 36.61 | 9.75  |
| 1615 | 26  | 10      | 262  | 265  | 16    | 2   | 3.6    | 55.556  | 18.286 | 0.329 | 46.41 | 78.35 | 37.22 | 9.07  |
| 1615 | 27  | 10      | 272  | 275  | 17    | 2   | 3.2    | 31.111  | 12.636 | 0.406 | 47.77 | 80.46 | 38.34 | 9.3   |

**Table S2** Continued.

| Cut  | Gen | Cut.Rep | Plot | Int | Block | Rep | Height | GB      | DB     | DM    | ADF   | NDF   | DIG   | LIG   |
|------|-----|---------|------|-----|-------|-----|--------|---------|--------|-------|-------|-------|-------|-------|
| 1615 | 28  | 10      | 282  | 285 | 18    | 2   | 2.8    | 32.889  | 11.995 | 0.365 | 43.27 | 76.65 | 43.16 | 8.81  |
| 1615 | 29  | 10      | 292  | 295 | 19    | 2   | 3.6    | 66.645  | 27.341 | 0.41  | 48.96 | 81.19 | 37.42 | 10.27 |
| 1615 | 30  | 10      | 302  | 305 | 20    | 2   | 3.3    | 45.778  | 15.699 | 0.343 | 47.95 | 78.91 | 37.26 | 9.51  |
| 1615 | 31  | 10      | 312  | 315 | 11    | 2   | 3.2    | 49.905  | 18.889 | 0.379 | 46.03 | 81.24 | 35.83 | 10.86 |
| 1615 | 32  | 10      | 322  | 325 | 12    | 2   | 3.3    | 36.214  | 13.331 | 0.368 | 42.24 | 78.25 | 36.24 | 9.94  |
| 1615 | 33  | 10      | 332  | 335 | 13    | 2   | 3.3    | 31.429  | 12.38  | 0.394 | 47.98 | 80.85 | 35.01 | 10.47 |
| 1615 | 34  | 10      | 342  | 345 | 14    | 2   | 3.2    | 24.494  | 10.799 | 0.441 | 46.87 | 80.52 | 34.92 | 11.23 |
| 1615 | 35  | 10      | 352  | 355 | 15    | 2   | 3.6    | 17.01   | 5.878  | 0.346 | 44.58 | 78.89 | 39.35 | 9.46  |
| 1615 | 36  | 10      | 362  | 365 | 16    | 2   | 3.8    | 68.889  | 20.48  | 0.297 | 47.02 | 79.2  | 36.78 | 9.58  |
| 1615 | 37  | 10      | 372  | 375 | 17    | 2   | 3      | 76.818  | 29.797 | 0.388 | 49.14 | 81.83 | 37.74 | 9.8   |
| 1615 | 38  | 10      | 382  | 385 | 18    | 2   | 3.4    | 54.931  | 19.935 | 0.363 | 43.52 | 76.43 | 38.44 | 9.77  |
| 1615 | 39  | 10      | 392  | 395 | 19    | 2   | 3.2    | 76.269  | 27.6   | 0.362 | 41.09 | 74.66 | 43.19 | 8.21  |
| 1615 | 40  | 10      | 402  | 405 | 20    | 2   | 4      | 98.909  | 32.266 | 0.326 | 43.65 | 74.16 | 39.59 | 7.69  |
| 1615 | 41  | 10      | 412  | 415 | 11    | 2   | 4.5    | 87.556  | 32.977 | 0.377 | 44.26 | 77.96 | 39.25 | 9.47  |
| 1615 | 42  | 10      | 422  | 425 | 12    | 2   | 3.4    | 99.395  | 40.902 | 0.412 | 46.35 | 78.76 | 38.31 | 8.77  |
| 1615 | 43  | 10      | 432  | 435 | 13    | 2   | 3.2    | 68.667  | 26.841 | 0.391 | 41.47 | 77.7  | 43.32 | 7.99  |
| 1615 | 44  | 10      | 442  | 445 | 14    | 2   | 3.5    | 85.048  | 38.727 | 0.455 | 47.44 | 80.69 | 37.73 | 9.82  |
| 1615 | 45  | 10      | 452  | 455 | 15    | 2   | 3.6    | 68.027  | 21.231 | 0.312 | 48.52 | 78.86 | 36.69 | 9.73  |
| 1615 | 46  | 10      | 462  | 465 | 16    | 2   | 3.2    | 38.462  | 13.329 | 0.347 | 47.29 | 79.71 | 35.25 | 10.17 |
| 1615 | 47  | 10      | 472  | 475 | 17    | 2   | 2      | 77.215  | 30.886 | 0.4   | NA    | NA    | NA    | NA    |
| 1615 | 48  | 10      | 482  | 485 | 18    | 2   | 4      | 54.667  | 17.59  | 0.322 | 43.99 | 75.64 | 39.81 | 9.06  |
| 1615 | 49  | 10      | 492  | 495 | 19    | 2   | 1.4    | 27.778  | 7.789  | 0.28  | 34.32 | 69.08 | 48.34 | 6.99  |
| 1615 | 50  | 10      | 502  | 505 | 20    | 2   | 3.2    | 89.463  | 32.648 | 0.365 | 48.59 | 81.19 | 35.38 | 10.83 |
| 1615 | 51  | 10      | 512  | 515 | 11    | 2   | 3.5    | 72.245  | 24.102 | 0.334 | 42.38 | 78.52 | 41.71 | 8.92  |
| 1615 | 52  | 10      | 522  | 525 | 12    | 2   | 3.2    | 59.556  | 20.896 | 0.351 | 47.05 | 80.03 | 32.23 | 10.98 |
| 1615 | 53  | 10      | 532  | 535 | 13    | 2   | 3.4    | 62.413  | 21.628 | 0.347 | 43.01 | 77.9  | 37.78 | 9.07  |
| 1615 | 54  | 10      | 542  | 545 | 14    | 2   | 3.5    | 104.082 | 38.851 | 0.373 | 47.11 | 80.08 | 37.14 | 9.85  |
| 1615 | 55  | 10      | 552  | 555 | 15    | 2   | 3.3    | 72      | 24.41  | 0.339 | 43.78 | 77.46 | 39.42 | 8.4   |
| 1615 | 56  | 10      | 562  | 565 | 16    | 2   | 3.8    | 46.429  | 14.062 | 0.303 | 44.75 | 75.05 | 40.58 | 8.23  |
| 1615 | 57  | 10      | 572  | 575 | 17    | 2   | 3.4    | 33.163  | 11.313 | 0.341 | 47.9  | 80.96 | 39.03 | 9.07  |
| 1615 | 58  | 10      | 582  | 585 | 18    | 2   | 3.2    | 76.331  | 23.004 | 0.301 | 48.61 | 77.49 | 41.58 | 8.36  |

**Table S2** Continued.

| Cut  | Gen | Cut.Rep | Plot | Int | Block | Rep | Height | GB      | DB     | DM    | ADF   | NDF   | DIG   | LIG   |
|------|-----|---------|------|-----|-------|-----|--------|---------|--------|-------|-------|-------|-------|-------|
| 1615 | 59  | 10      | 592  | 595 | 19    | 2   | 3      | 50.694  | 18.965 | 0.374 | 46.64 | 76.09 | 41.98 | 8.13  |
| 1615 | 60  | 10      | 602  | 605 | 20    | 2   | 3.4    | 31.25   | 11.167 | 0.357 | 43.96 | 76.52 | 40.72 | 8.7   |
| 1615 | 61  | 10      | 612  | 615 | 11    | 2   | 3.7    | 86.4    | 28.526 | 0.33  | 45.7  | 79.97 | 34.95 | 11.01 |
| 1615 | 62  | 10      | 622  | 625 | 12    | 2   | 2.5    | 31.328  | 12.022 | 0.384 | 46.43 | 78.84 | 38.56 | 8.7   |
| 1615 | 63  | 10      | 632  | 635 | 13    | 2   | 2.7    | 23.111  | 9.355  | 0.405 | 39.1  | 75.06 | 44.3  | 8.19  |
| 1615 | 64  | 10      | 642  | 645 | 14    | 2   | 3.4    | 81.333  | NA     | NA    | NA    | NA    | NA    | NA    |
| 1615 | 65  | 10      | 652  | 655 | 15    | 2   | 3.8    | 30.612  | 10.563 | 0.345 | 45.85 | 79.11 | 34.46 | 10.5  |
| 1615 | 66  | 10      | 662  | 665 | 16    | 2   | 3.3    | 75.868  | 28.375 | 0.374 | 46.33 | 79.75 | 38.94 | 8.9   |
| 1615 | 67  | 10      | 672  | 675 | 17    | 2   | 2.9    | 74.518  | 27.888 | 0.374 | 45.16 | 78.84 | 39.45 | 9.15  |
| 1615 | 68  | 10      | 682  | 685 | 18    | 2   | 3.5    | 83.884  | 26.148 | 0.312 | 48.99 | 80.4  | 32.57 | 10.9  |
| 1615 | 69  | 10      | 692  | 695 | 19    | 2   | 3.6    | 33.333  | 11.196 | 0.336 | 50.69 | 81.85 | 36.22 | 9.52  |
| 1615 | 70  | 10      | 702  | 705 | 20    | 2   | 3      | 30.444  | 10.619 | 0.349 | 50    | 81.33 | 36.94 | 9.75  |
| 1615 | 71  | 10      | 712  | 715 | 11    | 2   | 3.2    | 33.673  | 13.324 | 0.396 | 43.68 | 78.49 | 39.63 | 10.03 |
| 1615 | 72  | 10      | 722  | 725 | 12    | 2   | 3      | 62.551  | 27.244 | 0.436 | 45.73 | 79.63 | 38.31 | 9.28  |
| 1615 | 73  | 10      | 732  | 735 | 13    | 2   | 2.5    | 72.781  | 23.571 | 0.324 | 47.35 | 80.94 | 30.84 | 12.04 |
| 1615 | 74  | 10      | 742  | 745 | 14    | 2   | 3      | 13.776  | 5      | 0.333 | NA    | NA    | NA    | NA    |
| 1615 | 75  | 10      | 752  | 755 | 15    | 2   | 3.6    | 100.567 | 37.738 | 0.375 | 48.06 | 79.07 | 37.33 | 10.41 |
| 1615 | 76  | 10      | 762  | 765 | 16    | 2   | 3      | 37.778  | 14.308 | 0.379 | 46.57 | 78.26 | 38.64 | 8.61  |
| 1615 | 77  | 10      | 772  | 775 | 17    | 2   | 3.3    | 19.204  | 6.342  | 0.33  | 46.87 | 78.98 | 35.49 | 9.88  |
| 1615 | 78  | 10      | 782  | 785 | 18    | 2   | 3.8    | 54.444  | 19.273 | 0.354 | NA    | NA    | NA    | NA    |
| 1615 | 79  | 10      | 792  | 795 | 19    | 2   | 3      | 37.778  | 14.723 | 0.39  | 45.83 | 78.61 | 39.44 | 9.24  |
| 1615 | 80  | 10      | 802  | 805 | 20    | 2   | 3.6    | 24.444  | 7.685  | 0.314 | 49.77 | 81.12 | 37.96 | 9.22  |
| 1615 | 81  | 10      | 812  | 815 | 11    | 2   | 3.4    | 69.778  | 24.23  | 0.347 | 45.19 | 79.21 | 39.88 | 9.55  |
| 1615 | 82  | 10      | 822  | 825 | 12    | 2   | 3.4    | 62.222  | 27.593 | 0.443 | 43.61 | 78.35 | 39.64 | 10.06 |
| 1615 | 83  | 10      | 832  | 835 | 13    | 2   | 3.4    | 59.778  | 22.499 | 0.376 | 41.97 | 76.98 | 41.7  | 8.93  |
| 1615 | 84  | 10      | 842  | 845 | 14    | 2   | 3.6    | 68.444  | 25.649 | 0.375 | 49.39 | 81.71 | 30.77 | 11.33 |
| 1615 | 85  | 10      | 852  | 855 | 15    | 2   | 3.6    | 49.587  | 19.635 | 0.396 | 48.47 | 81.91 | 35.09 | 9.99  |
| 1615 | 86  | 10      | 862  | 865 | 16    | 2   | 2.8    | 32.64   | 12.859 | 0.394 | 49.16 | 80.33 | 38.35 | 9.08  |
| 1615 | 87  | 10      | 872  | 875 | 17    | 2   | 3.5    | 62.667  | 20.438 | 0.326 | 44.87 | 78.84 | 35.09 | 10.25 |
| 1615 | 88  | 10      | 882  | 885 | 18    | 2   | 3.8    | 72.667  | 20.905 | 0.288 | 43.46 | 74.29 | 37.03 | 9.63  |
| 1615 | 89  | 10      | 892  | 895 | 19    | 2   | 3.4    | 50      | 19.002 | 0.38  | 50.41 | 80.56 | 37.63 | 8.98  |
