# Supplementary material for: Unraveling candidate genes underlying biomass digestibility in elephant grass (Cenchrus purpureus)
Source: PubMed Central journal article supplement (PMC6905061; doi:10.1186/s12870-019-2180-5), 2019-12-10
Supplement: 12870_2019_2180_MOESM3_ESM.pdf [file 12870_2019_2180_MOESM3_ESM.pdf]

Table S3 Continued.

| Code | M41_120 | M41_128 | M41_130 | M12_294 | M4_235 | M4_243 | M4_254 | M4_256 | M4_258 | M4_260 | M4_265 | M4_266 | M4_267 | M4_269 | M4_271 | M4_275 | M4_281 | M4_285 | M4_289 |
|------|---------|---------|---------|---------|--------|--------|--------|--------|--------|--------|--------|--------|--------|--------|--------|--------|--------|--------|--------|
| 48   | 1       | 0       | 1       | 1       | 0      | 0      | 0      | 0      | 0      | 0      | 0      | 0      | 0      | 0      | 1      | 0      | 0      | 0      | 0      |
| 49   | 1       | 0       | 1       | 1       | 0      | 1      | 0      | 0      | 1      | 0      | 0      | 0      | 0      | 0      | 0      | 0      | 0      | 0      | 0      |
| 50   | 1       | 0       | 1       | 1       | 0      | 0      | 0      | 0      | 1      | 0      | 0      | 0      | 0      | 0      | 0      | 0      | 0      | 0      | 0      |
| 51   | 1       | 0       | 1       | 1       | 0      | 0      | 0      | 0      | 0      | 0      | 0      | 0      | 0      | 0      | 0      | 0      | 1      | 0      | 1      |
| 52   | 1       | 0       | 1       | 1       | 0      | 0      | 0      | 0      | 0      | 0      | 1      | 0      | 0      | 0      | 0      | 0      | 0      | 0      | 0      |
| 53   | 1       | 0       | 1       | 1       | 0      | 0      | 0      | 0      | 0      | 0      | 1      | 0      | 0      | 0      | 0      | 0      | 0      | 0      | 0      |
| 54   | 1       | 0       | 1       | 1       | 0      | 0      | 0      | 0      | 0      | 0      | 0      | 0      | 0      | 1      | 0      | 0      | 0      | 0      | 0      |
| 55   | 1       | 0       | 1       | 1       | 0      | 0      | 0      | 0      | 0      | 0      | 0      | 0      | 0      | 1      | 0      | 0      | 0      | 0      | 0      |
| 56   | 1       | 0       | 1       | 1       | 0      | 0      | 0      | 0      | 0      | 0      | 0      | 0      | 0      | 0      | 1      | 0      | 0      | 0      | 0      |
| 57   | 1       | 0       | 1       | 1       | 0      | 0      | 0      | 0      | 1      | 0      | 0      | 0      | 0      | 0      | 0      | 0      | 0      | 0      | 0      |
| 58   | 1       | 0       | 1       | 1       | 0      | 0      | 0      | 0      | 0      | 0      | 0      | 0      | 0      | 0      | 0      | 0      | 1      | 0      | 1      |
| 59   | 1       | 0       | 1       | 1       | 0      | 0      | 0      | 0      | 0      | 1      | 0      | 0      | 0      | 0      | 0      | 1      | 0      | 1      | 0      |
| 60   | 1       | 0       | 1       | 1       | 0      | 0      | 0      | 0      | 1      | 0      | 0      | 0      | 1      | 0      | 0      | 0      | 0      | 0      | 0      |
| 61   | 1       | 0       | 1       | 1       | 0      | 0      | 1      | 0      | 0      | 0      | 0      | 0      | 0      | 0      | 0      | 0      | 1      | 0      | 1      |
| 62   | 1       | 0       | 1       | 1       | 0      | 0      | 0      | 0      | 1      | 0      | 0      | 0      | 0      | 0      | 0      | 0      | 0      | 0      | 0      |
| 63   | 1       | 0       | 1       | 1       | 0      | 0      | 0      | 0      | 1      | 0      | 0      | 0      | 0      | 0      | 0      | 0      | 0      | 0      | 0      |
| 64   | 1       | 0       | 1       | 1       | 0      | 1      | 0      | 0      | 1      | 0      | 0      | 0      | 0      | 0      | 0      | 0      | 0      | 0      | 0      |
| 65   | 1       | 0       | 1       | 1       | 1      | 0      | 0      | 0      | 1      | 0      | 0      | 0      | 1      | 0      | 0      | 0      | 0      | 0      | 0      |
| 66   | 1       | 0       | 1       | 1       | 0      | 0      | 1      | 0      | 0      | 1      | 0      | 1      | 0      | 1      | 0      | 0      | 0      | 0      | 0      |
| 67   | 1       | 0       | 1       | 1       | 0      | 0      | 0      | 0      | 0      | 1      | 0      | 0      | 0      | 0      | 0      | 1      | 0      | 1      | 0      |
| 68   | 1       | 0       | 1       | 1       | 1      | 0      | 0      | 1      | 0      | 0      | 0      | 0      | 1      | 0      | 0      | 0      | 0      | 0      | 0      |
| 69   | 1       | 0       | 1       | 1       | 0      | 0      | 0      | 1      | 0      | 0      | 0      | 0      | 1      | 0      | 0      | 0      | 0      | 0      | 0      |
| 70   | 1       | 0       | 1       | 1       | 0      | 0      | 0      | 0      | 1      | 0      | 0      | 0      | 0      | 0      | 0      | 0      | 0      | 0      | 0      |
| 71   | 1       | 0       | 1       | 1       | 1      | 0      | 0      | 0      | 1      | 0      | 0      | 0      | 1      | 0      | 0      | 0      | 0      | 0      | 0      |
| 72   | 1       | 1       | 1       | 1       | 0      | 0      | 0      | 0      | 1      | 0      | 0      | 0      | 0      | 0      | 0      | 0      | 0      | 0      | 0      |
| 73   | 1       | 0       | 1       | 1       | 1      | 0      | 0      | 0      | 1      | 0      | 0      | 0      | 1      | 0      | 0      | 0      | 0      | 0      | 0      |
| 74   | 1       | 0       | 1       | 1       | 1      | 0      | 0      | 0      | 1      | 0      | 0      | 0      | 1      | 0      | 0      | 0      | 0      | 0      | 0      |
| 75   | 1       | 0       | 1       | 1       | 0      | 0      | 0      | 0      | 1      | 0      | 0      | 0      | 0      | 0      | 0      | 0      | 0      | 0      | 0      |
| 76   | 1       | 0       | 1       | 1       | 0      | 0      | 0      | 0      | 1      | 0      | 0      | 0      | 0      | 0      | 0      | 0      | 0      | 0      | 0      |
| 77   | 1       | 0       | 1       | 1       | 1      | 0      | 0      | 1      | 0      | 0      | 0      | 0      | 1      | 0      | 0      | 0      | 0      | 0      | 0      |
| 78   | 1       | 0       | 1       | 1       | 0      | 0      | 0      | 1      | 0      | 0      | 0      | 0      | 0      | 1      | 0      | 0      | 0      | 0      | 0      |
| 79   | 1       | 0       | 1       | 1       | 0      | 0      | 0      | 0      | 1      | 0      | 0      | 0      | 0      | 0      | 0      | 0      | 0      | 0      | 0      |
| 80   | 1       | 0       | 1       | 1       | 0      | 0      | 0      | 0      | 1      | 0      | 0      | 0      | 0      | 0      | 0      | 0      | 0      | 0      | 0      |
| 81   | 1       | 0       | 1       | 1       | 0      | 0      | 0      | 0      | 1      | 0      | 0      | 0      | 0      | 0      | 0      | 0      | 0      | 0      | 0      |
| 82   | 1       | 0       | 1       | 1       | 0      | 0      | 0      | 0      | 1      | 0      | 0      | 0      | 0      | 0      | 0      | 0      | 0      | 0      | 0      |
| 83   | 1       | 0       | 1       | 1       | 1      | 0      | 0      | 0      | 1      | 0      | 0      | 0      | 1      | 0      | 0      | 0      | 0      | 0      | 0      |
| 84   | 1       | 0       | 1       | 1       | 0      | 0      | 0      | 1      | 0      | 0      | 0      | 0      | 0      | 0      | 0      | 0      | 0      | 0      | 0      |
| 85   | 1       | 0       | 1       | 1       | 0      | 0      | 0      | 1      | 0      | 0      | 0      | 0      | 0      | 0      | 0      | 0      | 0      | 0      | 0      |
| 86   | 1       | 0       | 1       | 1       | 0      | 0      | 0      | 0      | 0      | 1      | 0      | 0      | 0      | 0      | 0      | 0      | 0      | 0      | 0      |
| 87   | 1       | 0       | 1       | 1       | 1      | 0      | 0      | 0      | 1      | 0      | 0      | 0      | 1      | 0      | 0      | 0      | 0      | 0      | 0      |
| 88   | 1       | 0       | 1       | 1       | 1      | 0      | 0      | 0      | 1      | 0      | 0      | 0      | 1      | 0      | 0      | 0      | 0      | 0      | 0      |
| 89   | 1       | 0       | 1       | 1       | 1      | 0      | 0      | 0      | 1      | 0      | 0      | 0      | 1      | 0      | 0      | 0      | 0      | 0      | 0      |
| 90   | 1       | 0       | 1       | 1       | 0      | 0      | 0      | 0      | 1      | 0      | 0      | 0      | 0      | 0      | 0      | 0      | 0      | 0      | 0      |
| 91   | 1       | 0       | 1       | 1       | 0      | 0      | 0      | 1      | 0      | 0      | 0      | 0      | 1      | 0      | 0      | 0      | 0      | 0      | 0      |
| 92   | 1       | 0       | 1       | 1       | 0      | 0      | 0      | 0      | 0      | 0      | 0      | 0      | 0      | 0      | 1      | 0      | 0      | 0      | 0      |

Table S3 Continued.

| Code | M24_182 | M24_184 | M24_187 | M24_189 | M24_191 | M24_193 | M24_195 | M17_171 | M17_173 | M8_292 | M8_294 | M39_152 | M39_154 | M39_156 | M39_158 | M39_183 | M39_185 | M39_187 | M39_189 |
|------|---------|---------|---------|---------|---------|---------|---------|---------|---------|--------|--------|---------|---------|---------|---------|---------|---------|---------|---------|
| 1    | 0       | 0       | 0       | 0       | 0       | 0       | 1       | 1       | 0       | 0      | 1      | 0       | 0       | 0       | 1       | 0       | 0       | 0       | 0       |
| 3    | 0       | 0       | 0       | 0       | 0       | 0       | 1       | 1       | 0       | 0      | 1      | 0       | 0       | 0       | 1       | 0       | 0       | 0       | 0       |
| 4    | 0       | 0       | 0       | 0       | 0       | 0       | 1       | 1       | 0       | 0      | 1      | 0       | 0       | 0       | 1       | NA      | NA      | NA      | NA      |
| 5    | 0       | 0       | 0       | 0       | 1       | 0       | 1       | 1       | 0       | 0      | 1      | 0       | 0       | 1       | 1       | NA      | NA      | NA      | NA      |
| 6    | 0       | 0       | 0       | 0       | 0       | 0       | 1       | 1       | 0       | 0      | 1      | 0       | 0       | 0       | 1       | 0       | 1       | 0       | 0       |
| 7    | 0       | 1       | 0       | 0       | 0       | 1       | 1       | 1       | 0       | 0      | 1      | 0       | 0       | 0       | 1       | 0       | 0       | 0       | 0       |
| 9    | 0       | 0       | 0       | 0       | 0       | 0       | 1       | 1       | 0       | 0      | 1      | 0       | 0       | 0       | 1       | NA      | NA      | NA      | NA      |
| 10   | 0       | 0       | 0       | 0       | 0       | 0       | 1       | 1       | 0       | 0      | 1      | 0       | 1       | 0       | 1       | 0       | 0       | 0       | 0       |
| 11   | 0       | 0       | 0       | 0       | 0       | 0       | 1       | 1       | 0       | 0      | 1      | 0       | 0       | 0       | 1       | 0       | 0       | 0       | 1       |
| 12   | 0       | 0       | 0       | 0       | 0       | 1       | 1       | 1       | 0       | 0      | 1      | 0       | 0       | 0       | 1       | 0       | 0       | 0       | 0       |
| 13   | 0       | 0       | 1       | 1       | 0       | 0       | 1       | 1       | 0       | 0      | 1      | 0       | 1       | 0       | 1       | NA      | NA      | NA      | NA      |
| 14   | 0       | 0       | 0       | 0       | 0       | 0       | 1       | 1       | 0       | 0      | 1      | 0       | 0       | 0       | 1       | 0       | 0       | 0       | 0       |
| 15   | 0       | 0       | 0       | 0       | 0       | 0       | 1       | 1       | 0       | 0      | 1      | 0       | 0       | 0       | 1       | 0       | 0       | 0       | 1       |
| 16   | 0       | 0       | 0       | 0       | 1       | 1       | 1       | 1       | 0       | 0      | 1      | 0       | 0       | 0       | 1       | 0       | 0       | 1       | 0       |
| 17   | 0       | 0       | 0       | 0       | 0       | 1       | 1       | 1       | 0       | 0      | 1      | 0       | 0       | 0       | 1       | 0       | 1       | 1       | 0       |
| 18   | 0       | 0       | 0       | 0       | 0       | 0       | 1       | 1       | 0       | 0      | 1      | 0       | 0       | 0       | 1       | 0       | 0       | 0       | 0       |
| 19   | 0       | 0       | 0       | 0       | 0       | 1       | 1       | 1       | 0       | 0      | 1      | 0       | 0       | 0       | 1       | 0       | 0       | 0       | 1       |
| 20   | 0       | 0       | 0       | 0       | 0       | 0       | 1       | 1       | 0       | 0      | 1      | 0       | 0       | 0       | 1       | 0       | 0       | 0       | 0       |
| 21   | 0       | 0       | 1       | 0       | 0       | 0       | 1       | 1       | 0       | 0      | 1      | 0       | 0       | 0       | 1       | 0       | 1       | 0       | 0       |
| 22   | 0       | 0       | 0       | 0       | 0       | 1       | 1       | 1       | 0       | 0      | 1      | 0       | 0       | 0       | 1       | 0       | 0       | 1       | 0       |
| 23   | 0       | 0       | 0       | 0       | 0       | 1       | 1       | 1       | 0       | 0      | 1      | 0       | 0       | 0       | 1       | 0       | 1       | 0       | 0       |
| 24   | 0       | 0       | 0       | 0       | 1       | 1       | 1       | 1       | 0       | 0      | 1      | 0       | 0       | 0       | 1       | 0       | 1       | 1       | 0       |
| 25   | 0       | 0       | 0       | 0       | 0       | 1       | 1       | 1       | 0       | 0      | 1      | 0       | 0       | 0       | 1       | 0       | 0       | 1       | 0       |
| 26   | NA      | NA      | NA      | NA      | NA      | NA      | NA      | 1       | 0       | 0      | 1      | 0       | 0       | 0       | 1       | 0       | 0       | 0       | 0       |
| 27   | 0       | 0       | 0       | 0       | 0       | 0       | 1       | 1       | 0       | 0      | 1      | 0       | 0       | 0       | 1       | 0       | 0       | 0       | 1       |
| 28   | 0       | 0       | 0       | 0       | 0       | 1       | 1       | 1       | 0       | 0      | 1      | NA      | NA      | NA      | NA      | 0       | 0       | 0       | 1       |
| 29   | 0       | 0       | 0       | 0       | 0       | 1       | 1       | 1       | 0       | 0      | 1      | 0       | 0       | 0       | 1       | 0       | 0       | 0       | 1       |
| 30   | 0       | 0       | 0       | 0       | 0       | 1       | 1       | 1       | 0       | 0      | 1      | 0       | 0       | 0       | 1       | 0       | 0       | 0       | 0       |
| 31   | 0       | 0       | 0       | 0       | 0       | 0       | 1       | 1       | 0       | 0      | 1      | 0       | 0       | 0       | 1       | 0       | 0       | 0       | 0       |
| 32   | 0       | 1       | 0       | 0       | 0       | 1       | 0       | 1       | 0       | 0      | 1      | 0       | 0       | 0       | 1       | 0       | 0       | 0       | 1       |
| 33   | 0       | 0       | 1       | 0       | 0       | 1       | 0       | 1       | 0       | 0      | 1      | 1       | 0       | 0       | 1       | 0       | 1       | 1       | 0       |
| 34   | 0       | 0       | 0       | 0       | 0       | 0       | 1       | 1       | 0       | 0      | 1      | 0       | 0       | 0       | 1       | 0       | 0       | 0       | 0       |
| 35   | 0       | 0       | 0       | 0       | 1       | 1       | 1       | 1       | 0       | 0      | 1      | 0       | 0       | 0       | 1       | 0       | 0       | 1       | 0       |
| 36   | 0       | 0       | 0       | 0       | 0       | 0       | 1       | 1       | 0       | 0      | 1      | 0       | 0       | 0       | 1       | 0       | 0       | 0       | 0       |
| 37   | 0       | 0       | 0       | 0       | 0       | 0       | 1       | 1       | 0       | 0      | 1      | 0       | 0       | 0       | 1       | 0       | 0       | 0       | 0       |
| 38   | 0       | 0       | 0       | 0       | 0       | 0       | 1       | 1       | 0       | 0      | 1      | 0       | 0       | 0       | 1       | 0       | 0       | 0       | 0       |
| 39   | 0       | 0       | 0       | 0       | 0       | 1       | 1       | 1       | 0       | 0      | 1      | 0       | 0       | 0       | 1       | 0       | 0       | 0       | 0       |
| 40   | 0       | 0       | 0       | 0       | 1       | 0       | 1       | 1       | 0       | 0      | 1      | 0       | 0       | 0       | 1       | 0       | 0       | 0       | 0       |
| 41   | 0       | 0       | 0       | 0       | 0       | 0       | 1       | 1       | 0       | 0      | 1      | 0       | 0       | 0       | 1       | 0       | 0       | 1       | 0       |
| 42   | 0       | 0       | 0       | 0       | 0       | 0       | 1       | 1       | 0       | 0      | 1      | 0       | 0       | 0       | 1       | 0       | 0       | 0       | 0       |
| 43   | 0       | 0       | 0       | 0       | 0       | 0       | 1       | 1       | 0       | 0      | 1      | 0       | 0       | 0       | 1       | NA      | NA      | NA      | NA      |
| 44   | 0       | 0       | 0       | 0       | 0       | 1       | 1       | 1       | 0       | 0      | 1      | 0       | 0       | 0       | 1       | 0       | 0       | 1       | 0       |
| 45   | 0       | 0       | 1       | 0       | 1       | 0       | 1       | 1       | 0       | 0      | 1      | 0       | 0       | 0       | 1       | 0       | 0       | 0       | 0       |
| 46   | 0       | 0       | 0       | 0       | 0       | 0       | 1       | 1       | 1       | 0      | 1      | 0       | 0       | 0       | 1       | 0       | 0       | 0       | 1       |
| 47   | 0       | 0       | 0       | 0       | 0       | 0       | 1       | 1       | 0       | 0      | 1      | 0       | 0       | 0       | 1       | 0       | 0       | 0       | 1       |

Table S3 Continued.

| Code | M24_182 | M24_184 | M24_187 | M24_189 | M24_191 | M24_193 | M24_195 | M17_171 | M17_173 | M8_292 | M8_294 | M39_152 | M39_154 | M39_156 | M39_158 | M39_183 | M39_185 | M39_187 | M39_189 |
|------|---------|---------|---------|---------|---------|---------|---------|---------|---------|--------|--------|---------|---------|---------|---------|---------|---------|---------|---------|
| 48   | 0       | 0       | 0       | 0       | 0       | 0       | 1       | 1       | 0       | 0      | 1      | 0       | 1       | 0       | 1       | 0       | 0       | 0       | 0       |
| 49   | 0       | 0       | 0       | 0       | 0       | 0       | 1       | 1       | 0       | 0      | 1      | 0       | 0       | 0       | 1       | 0       | 0       | 0       | 0       |
| 50   | 0       | 0       | 0       | 0       | 0       | 0       | 1       | 1       | 0       | 0      | 1      | 0       | 0       | 0       | 1       | 0       | 0       | 0       | 0       |
| 51   | 0       | 0       | 0       | 1       | 0       | 0       | 1       | 1       | 0       | 0      | 1      | 0       | 0       | 0       | 1       | 0       | 0       | 0       | 0       |
| 52   | 0       | 0       | 0       | 0       | 0       | 0       | 1       | 1       | 0       | 0      | 1      | 0       | 0       | 0       | 1       | 0       | 0       | 0       | 0       |
| 53   | 0       | 0       | 0       | 0       | 0       | 1       | 1       | 1       | 0       | 0      | 1      | 0       | 0       | 0       | 1       | 0       | 0       | 0       | 0       |
| 54   | 0       | 0       | 0       | 0       | 0       | 0       | 1       | 1       | 0       | 0      | 1      | 1       | 0       | 1       | 1       | 0       | 0       | 0       | 0       |
| 55   | 0       | 0       | 0       | 0       | 0       | 0       | 1       | 1       | 0       | 0      | 1      | 0       | 0       | 0       | 1       | 0       | 0       | 0       | 0       |
| 56   | 0       | 0       | 0       | 0       | 0       | 1       | 1       | 1       | 0       | 0      | 1      | 0       | 0       | 0       | 1       | NA      | NA      | NA      | NA      |
| 57   | 0       | 0       | 0       | 0       | 0       | 0       | 1       | 1       | 0       | 0      | 1      | 0       | 0       | 0       | 1       | NA      | NA      | NA      | NA      |
| 58   | 0       | 0       | 0       | 0       | 0       | 1       | 1       | 1       | 0       | 1      | 1      | 0       | 0       | 0       | 1       | 0       | 0       | 0       | 0       |
| 59   | 0       | 0       | 0       | 0       | 0       | 0       | 1       | 1       | 0       | 0      | 1      | 0       | 0       | 0       | 1       | 0       | 0       | 0       | 0       |
| 60   | 0       | 0       | 0       | 0       | 0       | 1       | 1       | 1       | 0       | 0      | 1      | 0       | 0       | 0       | 1       | 0       | 0       | 0       | 1       |
| 61   | 0       | 0       | 0       | 0       | 0       | 0       | 1       | 1       | 0       | 0      | 1      | 0       | 0       | 0       | 1       | 0       | 0       | 0       | 0       |
| 62   | 0       | 0       | 0       | 0       | 0       | 1       | 1       | 1       | 0       | 0      | 1      | 0       | 0       | 0       | 1       | 0       | 0       | 0       | 1       |
| 63   | 0       | 0       | 0       | 0       | 0       | 0       | 1       | 1       | 0       | 0      | 1      | 0       | 0       | 0       | 1       | 0       | 0       | 0       | 0       |
| 64   | 0       | 0       | 0       | 0       | 0       | 0       | 1       | 1       | 0       | 0      | 1      | 0       | 0       | 0       | 1       | 0       | 0       | 0       | 0       |
| 65   | 0       | 0       | 0       | 0       | 0       | 1       | 1       | 1       | 0       | 0      | 1      | 0       | 0       | 0       | 1       | 0       | 0       | 0       | 1       |
| 66   | 0       | 0       | 0       | 0       | 0       | 0       | 1       | 1       | 0       | 0      | 1      | 0       | 0       | 0       | 1       | 0       | 0       | 0       | 0       |
| 67   | 0       | 0       | 0       | 0       | 0       | 1       | 1       | 1       | 0       | 0      | 1      | 0       | 0       | 0       | 1       | 0       | 0       | 0       | 0       |
| 68   | 0       | 0       | 0       | 0       | 0       | 1       | 1       | 1       | 0       | 0      | 1      | 0       | 0       | 0       | 1       | 0       | 0       | 0       | 0       |
| 69   | 0       | 0       | 0       | 0       | 1       | 0       | 1       | 1       | 0       | 0      | 1      | 0       | 1       | 0       | 1       | 1       | 0       | 1       | 0       |
| 70   | 0       | 0       | 0       | 0       | 0       | 0       | 1       | 1       | 0       | 0      | 1      | 0       | 0       | 0       | 1       | 0       | 0       | 0       | 0       |
| 71   | 0       | 0       | 0       | 0       | 0       | 0       | 1       | 1       | 0       | 0      | 1      | 0       | 0       | 0       | 1       | 0       | 0       | 0       | 0       |
| 72   | 0       | 0       | 0       | 0       | 1       | 0       | 1       | 1       | 0       | 0      | 1      | 0       | 0       | 0       | 1       | 0       | 0       | 1       | 0       |
| 73   | 0       | 0       | 0       | 0       | 0       | 0       | 1       | 1       | 0       | 0      | 1      | 0       | 0       | 0       | 1       | 0       | 0       | 0       | 0       |
| 74   | 0       | 0       | 0       | 0       | 0       | 1       | 1       | 1       | 0       | 0      | 1      | 0       | 0       | 0       | 1       | 0       | 0       | 1       | 0       |
| 75   | 0       | 0       | 0       | 0       | 0       | 0       | 1       | 1       | 0       | 0      | 1      | 0       | 0       | 0       | 1       | 0       | 0       | 0       | 0       |
| 76   | 0       | 0       | 0       | 0       | 0       | 0       | 1       | 1       | 0       | 0      | 1      | 0       | 0       | 0       | 1       | 0       | 0       | 0       | 0       |
| 77   | 0       | 0       | 0       | 0       | 0       | 0       | 1       | 1       | 0       | 0      | 1      | 0       | 0       | 0       | 1       | 0       | 0       | 1       | 0       |
| 78   | 0       | 0       | 0       | 0       | 0       | 1       | 1       | 1       | 0       | 0      | 1      | 0       | 1       | 0       | 1       | 0       | 0       | 0       | 0       |
| 79   | 0       | 0       | 0       | 0       | 0       | 0       | 1       | 1       | 0       | 0      | 1      | 0       | 0       | 0       | 1       | NA      | NA      | NA      | NA      |
| 80   | 0       | 0       | 0       | 0       | 0       | 0       | 1       | 1       | 0       | 0      | 1      | 0       | 0       | 0       | 1       | 0       | 0       | 0       | 0       |
| 81   | 0       | 0       | 0       | 0       | 0       | 1       | 1       | 1       | 0       | 0      | 1      | 0       | 0       | 0       | 1       | 0       | 0       | 0       | 0       |
| 82   | 0       | 0       | 0       | 0       | 0       | 1       | 1       | 1       | 0       | 0      | 1      | 0       | 0       | 0       | 1       | 0       | 0       | 0       | 0       |
| 83   | 0       | 0       | 0       | 0       | 0       | 1       | 1       | 1       | 0       | 0      | 1      | 0       | 0       | 0       | 1       | 1       | 0       | 0       | 0       |
| 84   | 0       | 0       | 0       | 0       | 0       | 1       | 1       | 1       | 0       | 0      | 1      | 0       | 0       | 0       | 1       | 0       | 0       | 1       | 0       |
| 85   | 0       | 0       | 0       | 0       | 0       | 1       | 1       | 1       | 0       | 0      | 1      | 0       | 0       | 0       | 1       | 0       | 1       | 0       | 0       |
| 86   | 1       | 0       | 0       | 0       | 0       | 0       | 1       | 1       | 0       | 0      | 1      | 0       | 0       | 0       | 1       | 0       | 1       | 0       | 0       |
| 87   | 0       | 0       | 0       | 0       | 0       | 1       | 1       | 1       | 0       | 0      | 1      | NA      | NA      | NA      | NA      | 0       | 0       | 0       | 0       |
| 88   | 0       | 0       | 0       | 0       | 0       | 0       | 1       | 1       | 0       | 0      | 1      | 0       | 0       | 0       | 1       | 0       | 0       | 0       | 0       |
| 89   | 0       | 0       | 0       | 0       | 0       | 1       | 1       | 1       | 0       | 0      | 1      | 0       | 0       | 0       | 1       | 0       | 0       | 0       | 0       |
| 90   | NA      | NA      | NA      | NA      | NA      | NA      | NA      | 1       | 0       | 0      | 1      | 0       | 0       | 0       | 1       | NA      | NA      | NA      | NA      |
| 91   | 0       | 0       | 0       | 0       | 0       | 1       | 1       | 1       | 0       | 0      | 1      | 0       | 0       | 0       | 1       | 0       | 0       | 1       | 0       |
| 92   | 0       | 0       | 0       | 0       | 0       | 0       | 1       | 1       | 0       | 0      | 1      | NA      | NA      | NA      | NA      | 0       | 0       | 0       | 0       |

Table S3 Continued.

| Code | M39_191 | M39_193 | M39_197 | M39_199 | M39_201 | M39_203 | M39_205 | M39_207 | M39_209 | M48_87 | M48_89 | M48_93 | M45_160 | M45_161 | M45_163 | M6_161 | M6_163 | M6_165 | M42_231 |
|------|---------|---------|---------|---------|---------|---------|---------|---------|---------|--------|--------|--------|---------|---------|---------|--------|--------|--------|---------|
| 1    | 1       | 0       | 0       | 0       | 0       | 0       | 0       | 0       | 0       | 0      | 1      | 1      | NA      | NA      | NA      | 0      | 0      | 1      | 1       |
| 3    | 0       | 1       | 0       | 0       | 0       | 0       | 0       | 0       | 0       | 0      | 1      | 1      | 1       | 0       | 0       | 0      | 0      | 1      | 1       |
| 4    | NA      | NA      | NA      | NA      | NA      | NA      | NA      | NA      | NA      | 0      | 1      | 1      | 1       | 1       | 0       | 0      | 0      | 1      | 1       |
| 5    | NA      | NA      | NA      | NA      | NA      | NA      | NA      | NA      | NA      | 0      | 1      | 1      | 1       | 0       | 0       | 0      | 0      | 1      | 1       |
| 6    | 1       | 0       | 0       | 0       | 0       | 0       | 0       | 0       | 0       | 0      | 1      | 1      | 1       | 1       | 0       | 0      | 0      | 1      | 1       |
| 7    | 0       | 0       | 0       | 1       | 0       | 0       | 0       | 0       | 0       | 1      | 1      | 1      | NA      | NA      | NA      | 0      | 1      | 1      | 1       |
| 9    | NA      | NA      | NA      | NA      | NA      | NA      | NA      | NA      | NA      | 0      | 1      | 1      | NA      | NA      | NA      | 0      | 0      | 1      | 1       |
| 10   | 0       | 0       | 0       | 0       | 0       | 0       | 1       | 0       | 0       | 0      | 1      | 1      | 1       | 0       | 0       | 0      | 0      | 1      | 1       |
| 11   | 1       | 0       | 0       | 0       | 0       | 0       | 0       | 0       | 0       | 0      | 1      | 1      | 1       | 0       | 0       | 0      | 0      | 1      | 1       |
| 12   | 0       | 0       | 1       | 0       | 0       | 0       | 0       | 1       | 0       | 0      | 1      | 1      | 1       | 1       | 0       | 0      | 0      | 1      | 1       |
| 13   | NA      | NA      | NA      | NA      | NA      | NA      | NA      | NA      | NA      | 0      | 1      | 1      | 1       | 1       | 0       | 0      | 0      | 1      | 1       |
| 14   | 0       | 1       | 0       | 0       | 0       | 0       | 0       | 0       | 0       | 0      | 1      | 1      | 1       | 0       | 0       | 0      | 0      | 1      | 1       |
| 15   | 1       | 0       | 0       | 0       | 0       | 0       | 0       | 0       | 0       | 1      | 1      | 1      | 0       | 1       | 0       | 0      | 0      | 1      | 0       |
| 16   | 0       | 0       | 0       | 0       | 0       | 0       | 0       | 0       | 0       | 1      | 1      | 1      | 0       | 1       | 0       | 0      | 0      | 1      | 1       |
| 17   | 0       | 0       | 0       | 0       | 0       | 0       | 0       | 0       | 0       | 1      | 1      | 1      | 0       | 1       | 0       | 0      | 0      | 1      | NA      |
| 18   | 0       | 0       | 0       | 0       | 0       | 0       | 1       | 0       | 0       | 0      | 1      | 1      | 1       | 0       | 0       | 0      | 0      | 1      | 1       |
| 19   | 1       | 0       | 0       | 0       | 0       | 0       | 0       | 0       | 0       | 0      | 1      | 1      | 1       | 0       | 0       | 0      | 0      | 1      | 1       |
| 20   | 1       | 0       | 0       | 0       | 0       | 0       | 0       | 0       | 0       | 0      | 1      | 1      | 1       | 1       | 0       | 0      | 0      | 1      | 1       |
| 21   | 0       | 1       | 0       | 0       | 0       | 0       | 0       | 0       | 0       | 0      | 1      | 1      | 1       | 1       | 0       | 0      | 0      | 1      | 0       |
| 22   | 0       | 0       | 0       | 0       | 0       | 0       | 0       | 0       | 0       | 0      | 1      | 1      | 0       | 1       | 0       | 0      | 0      | 1      | 1       |
| 23   | 1       | 0       | 0       | 0       | 0       | 0       | 0       | 0       | 0       | 1      | 0      | 1      | NA      | NA      | NA      | 0      | 0      | 1      | 1       |
| 24   | 0       | 0       | 0       | 0       | 0       | 0       | 0       | 0       | 0       | 1      | 1      | 1      | 1       | 1       | 0       | 0      | 0      | 1      | 1       |
| 25   | 0       | 0       | 0       | 1       | 0       | 0       | 0       | 0       | 0       | 1      | 1      | 1      | NA      | NA      | NA      | 0      | 0      | 1      | 1       |
| 26   | 0       | 1       | 0       | 0       | 0       | 0       | 0       | 0       | 0       | 0      | 1      | 1      | 1       | 1       | 0       | 0      | 0      | 1      | 1       |
| 27   | 1       | 0       | 0       | 0       | 0       | 0       | 0       | 0       | 0       | 0      | 1      | 1      | 1       | 1       | 0       | 0      | 0      | 1      | 1       |
| 28   | 1       | 0       | 0       | 0       | 0       | 0       | 0       | 0       | 0       | 1      | 1      | 1      | NA      | NA      | NA      | 0      | 0      | 1      | 1       |
| 29   | 0       | 1       | 0       | 0       | 0       | 0       | 0       | 0       | 0       | 0      | 1      | 1      | NA      | NA      | NA      | 0      | 0      | 1      | 1       |
| 30   | 1       | 1       | 0       | 0       | 0       | 0       | 0       | 0       | 0       | 1      | 1      | 1      | 0       | 1       | 0       | 0      | 0      | 1      | 0       |
| 31   | 1       | 1       | 0       | 0       | 0       | 0       | 0       | 0       | 0       | 1      | 0      | 1      | NA      | NA      | NA      | 0      | 0      | 1      | 0       |
| 32   | 1       | 0       | 0       | 0       | 0       | 0       | 0       | 0       | 0       | 1      | 1      | 1      | 1       | 1       | 0       | 0      | 0      | 1      | 1       |
| 33   | 1       | 1       | 0       | 0       | 0       | 0       | 0       | 0       | 0       | 1      | 1      | 1      | NA      | NA      | NA      | 0      | 0      | 1      | 1       |
| 34   | 1       | 1       | 0       | 0       | 0       | 0       | 0       | 0       | 0       | 1      | 1      | 1      | 0       | 1       | 0       | 0      | 0      | 1      | 0       |
| 35   | 0       | 0       | 0       | 1       | 0       | 0       | 0       | 0       | 0       | 1      | 1      | 1      | 0       | 1       | 0       | 0      | 0      | 1      | 0       |
| 36   | 1       | 0       | 0       | 0       | 0       | 0       | 0       | 0       | 0       | 0      | 1      | 1      | 1       | 0       | 0       | 0      | 0      | 1      | 1       |
| 37   | 1       | 0       | 0       | 0       | 0       | 1       | 0       | 0       | 0       | 0      | 1      | 1      | NA      | NA      | NA      | 0      | 0      | 1      | 1       |
| 38   | 1       | 0       | 0       | 0       | 0       | 0       | 0       | 0       | 0       | 0      | 1      | 1      | 0       | 1       | 0       | 0      | 0      | 1      | 0       |
| 39   | 0       | 0       | 0       | 0       | 0       | 1       | 1       | 0       | 0       | 0      | 1      | 1      | NA      | NA      | NA      | 0      | 1      | 1      | 1       |
| 40   | 0       | 0       | 0       | 0       | 0       | 1       | 0       | 0       | 0       | 0      | 1      | 1      | 1       | 0       | 0       | 0      | 0      | 1      | 1       |
| 41   | 0       | 1       | 0       | 0       | 0       | 0       | 0       | 0       | 0       | 0      | 1      | 1      | 1       | 1       | 0       | 0      | 0      | 1      | 1       |
| 42   | 0       | 0       | 0       | 0       | 0       | 1       | 1       | 0       | 0       | 0      | 1      | 1      | NA      | NA      | NA      | 0      | 0      | 1      | 1       |
| 43   | NA      | NA      | NA      | NA      | NA      | NA      | NA      | NA      | NA      | 0      | 1      | 1      | 1       | 1       | 0       | 0      | 0      | 1      | 0       |
| 44   | 1       | 0       | 0       | 0       | 0       | 0       | 0       | 0       | 0       | 0      | 1      | 1      | NA      | NA      | NA      | 0      | 0      | 1      | 1       |
| 45   | 0       | 0       | 0       | 0       | 1       | 0       | 1       | 0       | 0       | 0      | 1      | 1      | 1       | 0       | 0       | 0      | 0      | 1      | 1       |
| 46   | 1       | 0       | 0       | 0       | 0       | 0       | 0       | 0       | 0       | 0      | 1      | 1      | 0       | 1       | 0       | 0      | 0      | 1      | 0       |
| 47   | 0       | 1       | 0       | 0       | 0       | 0       | 0       | 0       | 0       | 0      | 1      | 1      | 1       | 1       | 0       | 0      | 0      | 1      | 1       |

Table S3 Continued.

| Code | M39_191 | M39_193 | M39_197 | M39_199 | M39_201 | M39_203 | M39_205 | M39_207 | M39_209 | M48_87 | M48_89 | M48_93 | M45_160 | M45_161 | M45_163 | M6_161 | M6_163 | M6_165 | M42_231 |
|------|---------|---------|---------|---------|---------|---------|---------|---------|---------|--------|--------|--------|---------|---------|---------|--------|--------|--------|---------|
| 48   | 0       | 0       | 0       | 0       | 0       | 0       | 1       | 0       | 0       | 0      | 1      | 1      | NA      | NA      | NA      | 0      | 0      | 1      | 0       |
| 49   | 1       | 0       | 0       | 0       | 0       | 0       | 0       | 0       | 0       | 0      | 1      | 1      | 0       | 1       | 0       | 0      | 0      | 1      | 1       |
| 50   | 1       | 1       | 0       | 0       | 0       | 0       | 0       | 0       | 0       | 0      | 1      | 1      | NA      | NA      | NA      | 0      | 0      | 1      | 1       |
| 51   | 0       | 0       | 0       | 0       | 0       | 1       | 0       | 0       | 0       | 0      | 1      | 1      | 1       | 0       | 0       | 0      | 0      | 1      | 1       |
| 52   | 0       | 0       | 0       | 0       | 0       | 1       | 1       | 0       | 0       | 0      | 1      | 1      | 1       | 0       | 0       | 0      | 1      | 1      | 1       |
| 53   | 0       | 0       | 0       | 0       | 0       | 1       | 1       | 0       | 0       | 0      | 1      | 1      | NA      | NA      | NA      | 0      | 1      | 1      | 0       |
| 54   | 0       | 0       | 0       | 0       | 0       | 0       | 1       | 0       | 0       | 0      | 1      | 1      | 1       | 1       | 0       | 0      | 0      | 1      | 1       |
| 55   | 0       | 0       | 0       | 0       | 0       | 0       | 1       | 0       | 0       | 0      | 1      | 1      | 1       | 0       | 0       | 0      | 0      | 1      | 1       |
| 56   | NA      | NA      | NA      | NA      | NA      | NA      | NA      | NA      | NA      | 0      | 1      | 1      | 1       | 0       | 0       | 0      | 0      | 1      | 0       |
| 57   | NA      | NA      | NA      | NA      | NA      | NA      | NA      | NA      | NA      | 0      | 1      | 1      | 1       | 1       | 0       | 0      | 0      | 1      | 1       |
| 58   | 0       | 0       | 0       | 0       | 0       | 1       | 0       | 0       | 0       | 0      | 1      | 1      | NA      | NA      | NA      | 0      | 0      | 1      | 1       |
| 59   | 0       | 0       | 0       | 0       | 0       | 0       | 1       | 0       | 0       | 0      | 1      | 1      | 1       | 0       | 0       | 0      | 0      | 1      | 1       |
| 60   | 1       | 0       | 0       | 0       | 0       | 0       | 0       | 0       | 0       | 0      | 1      | 1      | 1       | 0       | 0       | 0      | 0      | 1      | 1       |
| 61   | 0       | 0       | 0       | 0       | 0       | 1       | 0       | 0       | 0       | 0      | 1      | 1      | 1       | 0       | 1       | 0      | 1      | 1      | 1       |
| 62   | 1       | 0       | 0       | 0       | 0       | 0       | 0       | 0       | 0       | 0      | 1      | 1      | 1       | 1       | 0       | 0      | 0      | 1      | 0       |
| 63   | 0       | 1       | 0       | 0       | 0       | 0       | 0       | 0       | 0       | 0      | 1      | 1      | 1       | 1       | 0       | 0      | 0      | 1      | 1       |
| 64   | 1       | 0       | 0       | 0       | 0       | 0       | 0       | 0       | 0       | 0      | 1      | 1      | 1       | 1       | 0       | 0      | 0      | 1      | 1       |
| 65   | 1       | 0       | 0       | 0       | 0       | 0       | 0       | 0       | 0       | 1      | 1      | 1      | 0       | 1       | 0       | 0      | 0      | 1      | 0       |
| 66   | 0       | 0       | 0       | 0       | 0       | 0       | 1       | 0       | 0       | 0      | 1      | 1      | 1       | 0       | 0       | 0      | 0      | 1      | 1       |
| 67   | 0       | 0       | 0       | 0       | 0       | 1       | 1       | 0       | 0       | 0      | 1      | 1      | 1       | 0       | 0       | 0      | 1      | 1      | 1       |
| 68   | 0       | 0       | 0       | 1       | 0       | 0       | 0       | 0       | 1       | 1      | 1      | 1      | 0       | 1       | 0       | 0      | 0      | 1      | 0       |
| 69   | 0       | 0       | 0       | 0       | 0       | 0       | 0       | 0       | 0       | 1      | 1      | 1      | 0       | 1       | 0       | 1      | 0      | 1      | 0       |
| 70   | 0       | 1       | 0       | 0       | 0       | 0       | 0       | 0       | 0       | 0      | 1      | 1      | 1       | 1       | 0       | 0      | 0      | 1      | 0       |
| 71   | 1       | 0       | 0       | 0       | 0       | 0       | 0       | 0       | 0       | 1      | 1      | 1      | 0       | 1       | 0       | 0      | 0      | 1      | 0       |
| 72   | 1       | 0       | 0       | 0       | 0       | 0       | 0       | 0       | 0       | 0      | 1      | 1      | 1       | 1       | 0       | 0      | 0      | 1      | 1       |
| 73   | 0       | 1       | 0       | 0       | 0       | 0       | 0       | 0       | 0       | 1      | 1      | 1      | 1       | 1       | 0       | 0      | 0      | 1      | 0       |
| 74   | 1       | 0       | 0       | 0       | 0       | 0       | 0       | 0       | 0       | 1      | 0      | 1      | 0       | 1       | 0       | 1      | 0      | 1      | 0       |
| 75   | 1       | 1       | 0       | 0       | 0       | 0       | 0       | 0       | 0       | 0      | 1      | 1      | 1       | 1       | 0       | 0      | 0      | 1      | 1       |
| 76   | 0       | 1       | 0       | 0       | 0       | 0       | 0       | 0       | 0       | 1      | 1      | 1      | 1       | 1       | 0       | 0      | 0      | 1      | 1       |
| 77   | 1       | 0       | 0       | 0       | 0       | 0       | 0       | 0       | 0       | 1      | 1      | 1      | 0       | 1       | 0       | 0      | 0      | 1      | 0       |
| 78   | 0       | 0       | 0       | 1       | 0       | 1       | 0       | 0       | 0       | 1      | 1      | 1      | 1       | 1       | 0       | 0      | 0      | 1      | 0       |
| 79   | NA      | NA      | NA      | NA      | NA      | NA      | NA      | NA      | NA      | 0      | 1      | 1      | 1       | 1       | 0       | 0      | 0      | 1      | 0       |
| 80   | 0       | 1       | 0       | 0       | 0       | 0       | 0       | 0       | 0       | 0      | 1      | 1      | 1       | 1       | 0       | 0      | 0      | 1      | 1       |
| 81   | 0       | 1       | 0       | 0       | 0       | 0       | 0       | 0       | 0       | 0      | 1      | 1      | 1       | 1       | 0       | 0      | 0      | 1      | 1       |
| 82   | 1       | 1       | 0       | 0       | 0       | 0       | 0       | 0       | 0       | 0      | 1      | 1      | 1       | 1       | 0       | 0      | 0      | 1      | 1       |
| 83   | 1       | 0       | 0       | 0       | 0       | 0       | 0       | 0       | 0       | 1      | 0      | 1      | 0       | 1       | 0       | 0      | 0      | 1      | 1       |
| 84   | 0       | 0       | 0       | 0       | 0       | 0       | 0       | 0       | 0       | 0      | 1      | 1      | 1       | 1       | 0       | 0      | 0      | 1      | 0       |
| 85   | 0       | 0       | 0       | 0       | 0       | 0       | 0       | 0       | 0       | 0      | 1      | 1      | 1       | 1       | 0       | 0      | 0      | 1      | 0       |
| 86   | 1       | 0       | 0       | 0       | 0       | 0       | 0       | 0       | 0       | 0      | 1      | 1      | 0       | 1       | 0       | 0      | 0      | 1      | 1       |
| 87   | 1       | 0       | 0       | 0       | 0       | 0       | 0       | 0       | 0       | 1      | 0      | 1      | 1       | 1       | 0       | 0      | 0      | 1      | 0       |
| 88   | 0       | 1       | 0       | 0       | 0       | 0       | 0       | 0       | 0       | 1      | 1      | 1      | 1       | 1       | 0       | 0      | 0      | 1      | 0       |
| 89   | 1       | 0       | 0       | 0       | 0       | 0       | 0       | 0       | 0       | 1      | 0      | 1      | 0       | 1       | 0       | 0      | 0      | 1      | 1       |
| 90   | NA      | NA      | NA      | NA      | NA      | NA      | NA      | NA      | NA      | NA     | NA     | NA     | 1       | 1       | 0       | 0      | 0      | 1      | 1       |
| 91   | 0       | 0       | 0       | 0       | 0       | 0       | 0       | 0       | 0       | 1      | 1      | 1      | 0       | 1       | 0       | 0      | 0      | 1      | 0       |
| 92   | 0       | 0       | 0       | 0       | 0       | 0       | 1       | 0       | 0       | 0      | 1      | 1      | 1       | 0       | 0       | 0      | 0      | 1      | 0       |

Table S3 Continued.

| Code | M42_233 | M42_237 | M42_239 | M42_245 | M42_251 | M42_259 | M42_261 | M42_263 | M44_209 | M44_215 | M44_221 | M44_223 | M54_128 | M54_130 | M28_161 | M28_162 | M28_169 | M28_170 | M35_170 |
|------|---------|---------|---------|---------|---------|---------|---------|---------|---------|---------|---------|---------|---------|---------|---------|---------|---------|---------|---------|
| 1    | 1       | 0       | 0       | 0       | 1       | 0       | 0       | 0       | NA      | NA      | NA      | NA      | NA      | NA      | NA      | NA      | NA      | NA      | 0       |
| 3    | 1       | 0       | 0       | 0       | 0       | 0       | 1       | 0       | 1       | 1       | 0       | 0       | 1       | 1       | 1       | 1       | 0       | 0       | 0       |
| 4    | 1       | 0       | 0       | 0       | 1       | 0       | 1       | 0       | 1       | 1       | 0       | 0       | 1       | 1       | 1       | 1       | 0       | 0       | 0       |
| 5    | 1       | 0       | 0       | 0       | 0       | 0       | 0       | 0       | 1       | 1       | 0       | 0       | 1       | 1       | 1       | 1       | 0       | 0       | 0       |
| 6    | 1       | 1       | 0       | 0       | 0       | 0       | 0       | 0       | 1       | 1       | 0       | 0       | 1       | 1       | 1       | 1       | 0       | 0       | 1       |
| 7    | 1       | 0       | 0       | 0       | 0       | 0       | 0       | 0       | NA      | NA      | NA      | NA      | NA      | NA      | 0       | 1       | 0       | 0       | 0       |
| 9    | 1       | 0       | 0       | 0       | 1       | 0       | 0       | 0       | 1       | 1       | 0       | 0       | NA      | NA      | 1       | 1       | 0       | 0       | 0       |
| 10   | 1       | 0       | 0       | 0       | 0       | 0       | 1       | 0       | 1       | 1       | 0       | 0       | 1       | 1       | 1       | 1       | 0       | 0       | 0       |
| 11   | 1       | 0       | 0       | 0       | 0       | 0       | 1       | 0       | 1       | 1       | 0       | 1       | 1       | 1       | 1       | 1       | 0       | 0       | 0       |
| 12   | 1       | 0       | 0       | 0       | 0       | 0       | 1       | 0       | 1       | 1       | 0       | 0       | 1       | 1       | 1       | 1       | 0       | 0       | 0       |
| 13   | 1       | 0       | 0       | 0       | 0       | 0       | 0       | 0       | 1       | 1       | 0       | 1       | 1       | 1       | 1       | 1       | 0       | 0       | 1       |
| 14   | 0       | 0       | 0       | 0       | 1       | 0       | 0       | 0       | 1       | 1       | 0       | 1       | 1       | 1       | 1       | 1       | 0       | 0       | 0       |
| 15   | 0       | 1       | 0       | 0       | 1       | 0       | 0       | 0       | NA      | NA      | NA      | NA      | NA      | NA      | NA      | NA      | NA      | NA      | 0       |
| 16   | 0       | 0       | 0       | 0       | 1       | 0       | 0       | 0       | NA      | NA      | NA      | NA      | NA      | NA      | NA      | NA      | NA      | NA      | 0       |
| 17   | NA      | NA      | NA      | NA      | NA      | NA      | NA      | NA      | NA      | NA      | NA      | NA      | NA      | NA      | NA      | NA      | NA      | NA      | 0       |
| 18   | 1       | 0       | 0       | 0       | 1       | 0       | 0       | 0       | 1       | 1       | 0       | 1       | 1       | 1       | 1       | 1       | 0       | 0       | 0       |
| 19   | 0       | 0       | 0       | 0       | 1       | 0       | 0       | 0       | NA      | NA      | NA      | NA      | NA      | NA      | NA      | NA      | NA      | NA      | 0       |
| 20   | 0       | 0       | 0       | 0       | 1       | 0       | 0       | 0       | 1       | 1       | 0       | 1       | 1       | 1       | 1       | 1       | 0       | 0       | 0       |
| 21   | 1       | 0       | 0       | 0       | 1       | 0       | 0       | 0       | 1       | 1       | 0       | 0       | 1       | 1       | NA      | NA      | NA      | NA      | 0       |
| 22   | 0       | 0       | 0       | 1       | 0       | 0       | 0       | 0       | NA      | NA      | NA      | NA      | NA      | NA      | NA      | NA      | NA      | NA      | NA      |
| 23   | 0       | 0       | 0       | 1       | 0       | 0       | 0       | 0       | NA      | NA      | NA      | NA      | NA      | NA      | 1       | 1       | 0       | 0       | 0       |
| 24   | 0       | 0       | 0       | 0       | 1       | 0       | 0       | 0       | NA      | NA      | NA      | NA      | 1       | 1       | 1       | 1       | 0       | 0       | 0       |
| 25   | 0       | 0       | 0       | 0       | 1       | 0       | 0       | 0       | 1       | 1       | 1       | 0       | 1       | 1       | 1       | 1       | 0       | 0       | 0       |
| 26   | 0       | 0       | 0       | 0       | 1       | 0       | 0       | 0       | 1       | 1       | 0       | 0       | 1       | 1       | 1       | 1       | 0       | 0       | 0       |
| 27   | 0       | 0       | 0       | 0       | 1       | 0       | 0       | 0       | 1       | 1       | 0       | 0       | 1       | 1       | 1       | 1       | 0       | 0       | 0       |
| 28   | 0       | 0       | 0       | 0       | 0       | 0       | 0       | 0       | NA      | NA      | NA      | NA      | NA      | NA      | 1       | 1       | 0       | 0       | 0       |
| 29   | 0       | 0       | 0       | 0       | 1       | 0       | 0       | 0       | NA      | NA      | NA      | NA      | NA      | NA      | NA      | NA      | NA      | NA      | 0       |
| 30   | 0       | 0       | 0       | 0       | 1       | 0       | 0       | 0       | 1       | 1       | 0       | 0       | 1       | 1       | 1       | 1       | 0       | 0       | 0       |
| 31   | 0       | 0       | 0       | 0       | 1       | 0       | 0       | 0       | NA      | NA      | NA      | NA      | 1       | 1       | 1       | 1       | 0       | 0       | 0       |
| 32   | 0       | 0       | 0       | 1       | 0       | 0       | 0       | 0       | 1       | 1       | 0       | 0       | 1       | 1       | 1       | 1       | 0       | 0       | 0       |
| 33   | 0       | 0       | 0       | 0       | 0       | 0       | 0       | 0       | NA      | NA      | NA      | NA      | NA      | NA      | NA      | NA      | NA      | NA      | NA      |
| 34   | 0       | 0       | 0       | 0       | 1       | 0       | 0       | 0       | 1       | 1       | 0       | 0       | 1       | 1       | 1       | 1       | 0       | 0       | 0       |
| 35   | 0       | 1       | 0       | 0       | 1       | 0       | 0       | 0       | 1       | 1       | 0       | 0       | 1       | 1       | 1       | 1       | 0       | 0       | 0       |
| 36   | 1       | 0       | 0       | 0       | 0       | 0       | 0       | 0       | 1       | 0       | 0       | 1       | 1       | 1       | 1       | 1       | 0       | 0       | 0       |
| 37   | 0       | 1       | 0       | 0       | 0       | 0       | 0       | 0       | NA      | NA      | NA      | NA      | 1       | 1       | 1       | 1       | 0       | 0       | 0       |
| 38   | 0       | 0       | 0       | 0       | 1       | 0       | 0       | 0       | 1       | 1       | 0       | 0       | 1       | 1       | 1       | 1       | 0       | 0       | 0       |
| 39   | 0       | 0       | 0       | 0       | 0       | 0       | 0       | 0       | NA      | NA      | NA      | NA      | NA      | NA      | 0       | 1       | 0       | 0       | 0       |
| 40   | 0       | 1       | 0       | 0       | 0       | 0       | 0       | 0       | 1       | 0       | 1       | 1       | 1       | 1       | 1       | 1       | 0       | 0       | 0       |
| 41   | 0       | 0       | 0       | 0       | 1       | 0       | 0       | 0       | 1       | 1       | 0       | 0       | 1       | 1       | 1       | 1       | 0       | 0       | 0       |
| 42   | 0       | 0       | 0       | 0       | 0       | 0       | 0       | 1       | NA      | NA      | NA      | NA      | 1       | 1       | 1       | 1       | 1       | 1       | 0       |
| 43   | 0       | 0       | 0       | 0       | 1       | 0       | 0       | 0       | NA      | NA      | NA      | NA      | NA      | NA      | 0       | 1       | 0       | 0       | 0       |
| 44   | 0       | 0       | 0       | 0       | 1       | 0       | 0       | 0       | NA      | NA      | NA      | NA      | 1       | 1       | 0       | 1       | 0       | 0       | 0       |
| 45   | 0       | 0       | 0       | 0       | 0       | 0       | 0       | 1       | 1       | 1       | 0       | 0       | 1       | 1       | 1       | 1       | 1       | 1       | 0       |
| 46   | 0       | 0       | 1       | 0       | 1       | 0       | 0       | 0       | 1       | 1       | 0       | 0       | 1       | 1       | 1       | 1       | 0       | 0       | 0       |
| 47   | 0       | 0       | 0       | 0       | 1       | 0       | 0       | 0       | 1       | 1       | 0       | 0       | 1       | 1       | 1       | 1       | 0       | 0       | 0       |

Table S3 Continued.

| Code | M42_233 | M42_237 | M42_239 | M42_245 | M42_251 | M42_259 | M42_261 | M42_263 | M44_209 | M44_215 | M44_221 | M44_223 | M54_128 | M54_130 | M28_161 | M28_162 | M28_169 | M28_170 | M35_170 |
|------|---------|---------|---------|---------|---------|---------|---------|---------|---------|---------|---------|---------|---------|---------|---------|---------|---------|---------|---------|
| 48   | 1       | 0       | 0       | 0       | 0       | 0       | 0       | 0       | NA      | NA      | NA      | NA      | 1       | 1       | 1       | 1       | 0       | 0       | 0       |
| 49   | 0       | 0       | 0       | 0       | 1       | 0       | 0       | 0       | 1       | 1       | 0       | 1       | 1       | 1       | 1       | 1       | 0       | 0       | 0       |
| 50   | 0       | 1       | 0       | 0       | 1       | 0       | 0       | 0       | NA      | NA      | NA      | NA      | NA      | NA      | 0       | 1       | 0       | 0       | 0       |
| 51   | 0       | 1       | 0       | 0       | 0       | 0       | 0       | 0       | 1       | 1       | 0       | 1       | 1       | 1       | 1       | 1       | 0       | 0       | 0       |
| 52   | 1       | 0       | 0       | 0       | 0       | 0       | 0       | 1       | 1       | 1       | 0       | 0       | 1       | 1       | 1       | 1       | 0       | 0       | 0       |
| 53   | 1       | 0       | 0       | 0       | 0       | 0       | 0       | 1       | 1       | 1       | 1       | 0       | 1       | 1       | 1       | 1       | 0       | 0       | 0       |
| 54   | 1       | 1       | 0       | 0       | 1       | 0       | 0       | 0       | 1       | 1       | 1       | 0       | NA      | NA      | 1       | 1       | 0       | 0       | 0       |
| 55   | 1       | 0       | 0       | 0       | 0       | 0       | 0       | 0       | 1       | 1       | 0       | 0       | 1       | 1       | 1       | 1       | 0       | 0       | 0       |
| 56   | 1       | 0       | 0       | 0       | 1       | 0       | 0       | 0       | 1       | 1       | 0       | 1       | 1       | 1       | 1       | 1       | 0       | 0       | 0       |
| 57   | 0       | 0       | 0       | 0       | 1       | 0       | 0       | 0       | 1       | 1       | 0       | 0       | 1       | 1       | 1       | 1       | 0       | 0       | 0       |
| 58   | 1       | 0       | 0       | 0       | 0       | 0       | 0       | 0       | NA      | NA      | NA      | NA      | NA      | NA      | NA      | NA      | NA      | NA      | 0       |
| 59   | 0       | 0       | 0       | 0       | 0       | 0       | 0       | 1       | 1       | 1       | 0       | 0       | 1       | 1       | 1       | 1       | 1       | 1       | 0       |
| 60   | 0       | 0       | 0       | 0       | 0       | 0       | 0       | 1       | 1       | 1       | 0       | 0       | 1       | 1       | 1       | 1       | 1       | 1       | 0       |
| 61   | 0       | 1       | 0       | 0       | 0       | 0       | 0       | 0       | 1       | 1       | 0       | 1       | 1       | 1       | 1       | 1       | 0       | 0       | 0       |
| 62   | 1       | 0       | 0       | 0       | 1       | 0       | 0       | 0       | 1       | 1       | 0       | 0       | 1       | 1       | 1       | 1       | 0       | 0       | 0       |
| 63   | 0       | 0       | 0       | 0       | 1       | 0       | 0       | 0       | 1       | 1       | 0       | 0       | 1       | 1       | 1       | 1       | 0       | 0       | 0       |
| 64   | 0       | 0       | 0       | 0       | 1       | 0       | 0       | 0       | 1       | 1       | 0       | 1       | 1       | 1       | 1       | 1       | 0       | 0       | 0       |
| 65   | 0       | 0       | 0       | 1       | 1       | 0       | 0       | 0       | 1       | 1       | 0       | 0       | 1       | 1       | 1       | 1       | 0       | 0       | 1       |
| 66   | 1       | 0       | 0       | 0       | 0       | 0       | 0       | 0       | 1       | 1       | 0       | 0       | 1       | 1       | 1       | 1       | 0       | 0       | 0       |
| 67   | 0       | 0       | 0       | 0       | 0       | 0       | 0       | 1       | 1       | 1       | 0       | 0       | 1       | 1       | 1       | 1       | 1       | 1       | 0       |
| 68   | 0       | 0       | 0       | 1       | 1       | 0       | 0       | 0       | 1       | 1       | 0       | 0       | 1       | 1       | 1       | 1       | 0       | 0       | 0       |
| 69   | 0       | 1       | 0       | 1       | 1       | 0       | 0       | 0       | 1       | 1       | 0       | 0       | 1       | 1       | 1       | 1       | 0       | 0       | 0       |
| 70   | 1       | 0       | 0       | 0       | 1       | 0       | 0       | 0       | 1       | 1       | 0       | 0       | 1       | 1       | 1       | 1       | 0       | 0       | 0       |
| 71   | 0       | 0       | 0       | 1       | 1       | 0       | 0       | 0       | 1       | 1       | 0       | 0       | 1       | 1       | 1       | 1       | 0       | 0       | 0       |
| 72   | 0       | 0       | 0       | 0       | 1       | 0       | 0       | 0       | 1       | 1       | 0       | 0       | 1       | 1       | 1       | 1       | 0       | 0       | 0       |
| 73   | 0       | 0       | 0       | 0       | 1       | 0       | 0       | 1       | 1       | 1       | 0       | 0       | 1       | 1       | 1       | 1       | 1       | 1       | 0       |
| 74   | 1       | 0       | 0       | 0       | 1       | 0       | 0       | 0       | 0       | 1       | 0       | 0       | 1       | 1       | 1       | 1       | 0       | 0       | 1       |
| 75   | 0       | 0       | 0       | 0       | 1       | 0       | 0       | 0       | 1       | 1       | 0       | 0       | 1       | 1       | 1       | 1       | 0       | 0       | 0       |
| 76   | 0       | 0       | 0       | 0       | 1       | 0       | 0       | 0       | 1       | 1       | 0       | 0       | 1       | 1       | 1       | 1       | 0       | 0       | 0       |
| 77   | 0       | 0       | 0       | 0       | 1       | 0       | 0       | 0       | 1       | 1       | 0       | 0       | 1       | 1       | 1       | 1       | 0       | 0       | 0       |
| 78   | 0       | 0       | 0       | 0       | 1       | 0       | 0       | 1       | 1       | 1       | 0       | 0       | 1       | 1       | 1       | 1       | 1       | 1       | 0       |
| 79   | 1       | 0       | 0       | 0       | 1       | 0       | 0       | 0       | 1       | 1       | 0       | 0       | 1       | 1       | 1       | 1       | 0       | 0       | 0       |
| 80   | 0       | 0       | 0       | 0       | 1       | 0       | 0       | 0       | 1       | 1       | 0       | 0       | 1       | 1       | 1       | 1       | 0       | 0       | 1       |
| 81   | 0       | 0       | 0       | 0       | 1       | 0       | 0       | 0       | 1       | 1       | 0       | 0       | 1       | 1       | 1       | 1       | 0       | 0       | 0       |
| 82   | 0       | 0       | 0       | 0       | 1       | 0       | 0       | 0       | 1       | 1       | 0       | 0       | 1       | 1       | 1       | 1       | 0       | 0       | 0       |
| 83   | 0       | 0       | 0       | 1       | 0       | 0       | 0       | 0       | 1       | 1       | 0       | 0       | 1       | 1       | 1       | 1       | 0       | 0       | 0       |
| 84   | 1       | 0       | 0       | 0       | 0       | 0       | 0       | 0       | 1       | 1       | 0       | 0       | 1       | 1       | 1       | 1       | 0       | 0       | 0       |
| 85   | 1       | 0       | 0       | 1       | 0       | 0       | 0       | 0       | 1       | 1       | 0       | 0       | 1       | 1       | 1       | 1       | 0       | 0       | 0       |
| 86   | 0       | 0       | 0       | 0       | 1       | 0       | 0       | 0       | 1       | 1       | 0       | 0       | 1       | 1       | 1       | 1       | 0       | 0       | 0       |
| 87   | 0       | 0       | 0       | 1       | 1       | 0       | 0       | 1       | 1       | 1       | 0       | 0       | 1       | 1       | 1       | 1       | 0       | 0       | 0       |
| 88   | 0       | 0       | 0       | 0       | 1       | 1       | 0       | 1       | 1       | 1       | 0       | 0       | 1       | 1       | 1       | 1       | 0       | 0       | 0       |
| 89   | 0       | 0       | 0       | 1       | 0       | 0       | 0       | 0       | 1       | 1       | 0       | 0       | 1       | 1       | 1       | 1       | 0       | 0       | 0       |
| 90   | 0       | 0       | 0       | 0       | 1       | 0       | 0       | 0       | 1       | 1       | 0       | 0       | 1       | 1       | 1       | 1       | 0       | 0       | 0       |
| 91   | 0       | 1       | 0       | 0       | 1       | 0       | 0       | 0       | 1       | 1       | 0       | 0       | 1       | 1       | 1       | 1       | 0       | 0       | 0       |
| 92   | 1       | 0       | 0       | 0       | 1       | 0       | 0       | 0       | 1       | 1       | 0       | 1       | 1       | 1       | 1       | 1       | 0       | 0       | 0       |



Table S3 Continued.

| Code | M35_172 | M35_185 | M35_187 | M35_192 | M35_198 | M35_202 | M35_204 | M35_207 | M35_210 | M35_211 | M35_213 | M35_215 | M35_220 | M35_222 | M35_223 | M35_226 | M53_141 | M53_143 | M53_145 |
|------|---------|---------|---------|---------|---------|---------|---------|---------|---------|---------|---------|---------|---------|---------|---------|---------|---------|---------|---------|
| 1    | 1       | 0       | 0       | 1       | 0       | 0       | 0       | 1       | 0       | 0       | 0       | 0       | 0       | 0       | 1       | 0       | 0       | 1       | 1       |
| 3    | 0       | 0       | 0       | 1       | 0       | 0       | 0       | 1       | 0       | 0       | 0       | 1       | 0       | 0       | 0       | 0       | 1       | 1       | 0       |
| 4    | 0       | 0       | 0       | 1       | 0       | 0       | 0       | 1       | 0       | 0       | 0       | 0       | 0       | 0       | 0       | 0       | 1       | 1       | 0       |
| 5    | 1       | 0       | 0       | 1       | 0       | 0       | 0       | 1       | 0       | 0       | 0       | 0       | 0       | 0       | 0       | 0       | 1       | 1       | 0       |
| 6    | 0       | 0       | 0       | 1       | 0       | 0       | 0       | 1       | 0       | 0       | 0       | 0       | 0       | 1       | 0       | 0       | 1       | 1       | 1       |
| 7    | 1       | 0       | 0       | 0       | 0       | 1       | 0       | 1       | 0       | 0       | 0       | 0       | 0       | 0       | 0       | 0       | 0       | 1       | 1       |
| 9    | 1       | 0       | 0       | 1       | 0       | 0       | 0       | 1       | 0       | 0       | 0       | 0       | 0       | 0       | 0       | 0       | 1       | 1       | 1       |
| 10   | 0       | 0       | 0       | 1       | 0       | 0       | 0       | 0       | 0       | 0       | 1       | 1       | 0       | 0       | 0       | 0       | 0       | 1       | 1       |
| 11   | 1       | 1       | 0       | 1       | 0       | 0       | 0       | 1       | 0       | 0       | 0       | 0       | 0       | 0       | 1       | 0       | 0       | 1       | 1       |
| 12   | 0       | 0       | 0       | 1       | 0       | 0       | 0       | 1       | 0       | 0       | 0       | 0       | 0       | 0       | 1       | 0       | 0       | 1       | 1       |
| 13   | 0       | 1       | 0       | 1       | 0       | 0       | 0       | 1       | 0       | 0       | 0       | 0       | 0       | 0       | 1       | 0       | 1       | 0       | 1       |
| 14   | 1       | 1       | 0       | 1       | 0       | 0       | 0       | 1       | 0       | 0       | 0       | 0       | 0       | 0       | 1       | 0       | 1       | 0       | 1       |
| 15   | 1       | 0       | 0       | 0       | 0       | 0       | 0       | 0       | 0       | 0       | 0       | 0       | 0       | 0       | 0       | 0       | 0       | 1       | 1       |
| 16   | 1       | 0       | 0       | 0       | 0       | 0       | 0       | 1       | 0       | 0       | 0       | 0       | 0       | 0       | 0       | 0       | 0       | 1       | 1       |
| 17   | 1       | 0       | 0       | 0       | 0       | 0       | 0       | 0       | 0       | 0       | 0       | 0       | 0       | 0       | 0       | 0       | 0       | 0       | 1       |
| 18   | 1       | 0       | 0       | 1       | 0       | 0       | 0       | 0       | 0       | 0       | 0       | 1       | 0       | 0       | 1       | 0       | 0       | 1       | 1       |
| 19   | 0       | 1       | 0       | 1       | 0       | 0       | 0       | 0       | 0       | 0       | 0       | 1       | 0       | 0       | 1       | 0       | 0       | 1       | 1       |
| 20   | 1       | 1       | 0       | 1       | 0       | 0       | 0       | 0       | 0       | 0       | 0       | 1       | 0       | 0       | 1       | 0       | 0       | 1       | 1       |
| 21   | 0       | 0       | 0       | 0       | 0       | 0       | 0       | 1       | 0       | 0       | 0       | 0       | 0       | 1       | 0       | 0       | 1       | 0       | 1       |
| 22   | NA      | NA      | NA      | NA      | NA      | NA      | NA      | NA      | NA      | NA      | NA      | NA      | NA      | NA      | NA      | NA      | 0       | 1       | 1       |
| 23   | 1       | 0       | 0       | 1       | 0       | 0       | 0       | 0       | 0       | 0       | 0       | 1       | 0       | 1       | 0       | 0       | 0       | 0       | 1       |
| 24   | 1       | 0       | 0       | 1       | 0       | 0       | 0       | 0       | 0       | 0       | 0       | 0       | 0       | 1       | 1       | 0       | 0       | 0       | 1       |
| 25   | 1       | 0       | 0       | 1       | 0       | 0       | 0       | 0       | 0       | 0       | 0       | 0       | 0       | 1       | 0       | 0       | 0       | 1       | 1       |
| 26   | 1       | 0       | 0       | 1       | 0       | 0       | 0       | 1       | 0       | 0       | 0       | 0       | 0       | 1       | 0       | 0       | 1       | 0       | 1       |
| 27   | 1       | 0       | 0       | 1       | 0       | 0       | 0       | 1       | 0       | 0       | 0       | 0       | 0       | 1       | 0       | 0       | 0       | 1       | 1       |
| 28   | 0       | 0       | 0       | 0       | 0       | 0       | 0       | 0       | 0       | 0       | 0       | 1       | 0       | 0       | 1       | 0       | 0       | 1       | 1       |
| 29   | 1       | 0       | 0       | 1       | 0       | 0       | 0       | 0       | 0       | 0       | 0       | 1       | 0       | 1       | 1       | 0       | 0       | 1       | 1       |
| 30   | 1       | 0       | 0       | 1       | 0       | 0       | 0       | 0       | 0       | 0       | 0       | 0       | 0       | 1       | 0       | 0       | 0       | 1       | 1       |
| 31   | 1       | 1       | 0       | 1       | 0       | 0       | 0       | 0       | 0       | 0       | 0       | 0       | 0       | 1       | 0       | 0       | 0       | 0       | 1       |
| 32   | 1       | 0       | 0       | 1       | 0       | 0       | 0       | 1       | 0       | 0       | 0       | 1       | 0       | 0       | 0       | 0       | 0       | 0       | 1       |
| 33   | NA      | NA      | NA      | NA      | NA      | NA      | NA      | NA      | NA      | NA      | NA      | NA      | NA      | NA      | NA      | NA      | 0       | 1       | 1       |
| 34   | 1       | 0       | 0       | 1       | 0       | 0       | 0       | 0       | 0       | 0       | 0       | 0       | 0       | 1       | 0       | 0       | 0       | 1       | 1       |
| 35   | 1       | 0       | 0       | 1       | 0       | 0       | 0       | 0       | 0       | 0       | 0       | 0       | 0       | 1       | 0       | 0       | 0       | 1       | 1       |
| 36   | 0       | 0       | 0       | 1       | 0       | 0       | 0       | 0       | 0       | 0       | 1       | 1       | 0       | 0       | 0       | 0       | 0       | 1       | 1       |
| 37   | 0       | 0       | 1       | 1       | 0       | 0       | 1       | 0       | 0       | 0       | 0       | 0       | 0       | 0       | 0       | 0       | 0       | 1       | 0       |
| 38   | 1       | 0       | 0       | 1       | 0       | 0       | 0       | 1       | 0       | 0       | 0       | 0       | 0       | 1       | 0       | 0       | 1       | 0       | 1       |
| 39   | 1       | 0       | 0       | 0       | 1       | 0       | 0       | 0       | 0       | 0       | 0       | 0       | 0       | 0       | 0       | 1       | 0       | 1       | 1       |
| 40   | 0       | 0       | 1       | 1       | 0       | 0       | 1       | 0       | 0       | 0       | 0       | 0       | 0       | 0       | 0       | 0       | 0       | 1       | 0       |
| 41   | 1       | 0       | 0       | 1       | 0       | 0       | 0       | 1       | 0       | 0       | 0       | 0       | 0       | 1       | 0       | 0       | 1       | 0       | 1       |
| 42   | 0       | 0       | 0       | 0       | 1       | 0       | 0       | 0       | 0       | 0       | 0       | 0       | 0       | 0       | 0       | 1       | 0       | 1       | 1       |
| 43   | 1       | 0       | 0       | 1       | 0       | 0       | 0       | 1       | 0       | 0       | 0       | 0       | 0       | 1       | 0       | 0       | 0       | 0       | 1       |
| 44   | 1       | 0       | 0       | 1       | 0       | 0       | 0       | 1       | 0       | 0       | 0       | 0       | 0       | 1       | 0       | 0       | 1       | 0       | 1       |
| 45   | 0       | 0       | 1       | 1       | 1       | 0       | 0       | 0       | 0       | 0       | 0       | 0       | 0       | 0       | 0       | 1       | 0       | 1       | 0       |
| 46   | 1       | 0       | 0       | 0       | 1       | 0       | 0       | 0       | 1       | 0       | 0       | 1       | 0       | 0       | 0       | 0       | 0       | 1       | 1       |
| 47   | 1       | 0       | 0       | 1       | 0       | 0       | 0       | 1       | 0       | 0       | 0       | 0       | 0       | 1       | 0       | 0       | 1       | 0       | 1       |



Table S3 Continued.

| Code | M31_212 | M31_220 | M31_223 | M31_224 | M31_225 | M31_236 | M34_157 | M34_159 | M34_163 | M34_165 | M34_167 | M34_168 | M34_169 | M34_171 | M34_175 | M34_177 |
|------|---------|---------|---------|---------|---------|---------|---------|---------|---------|---------|---------|---------|---------|---------|---------|---------|
| 1    | 0       | 0       | 1       | 0       | 0       | 0       | 0       | 0       | 0       | 1       | 0       | 0       | 1       | 0       | 0       | 0       |
| 3    | 0       | 1       | 0       | 1       | 0       | 0       | 0       | 0       | 0       | 1       | 0       | 0       | 1       | 0       | 0       | 0       |
| 4    | 0       | 1       | 0       | 1       | 0       | 0       | 0       | 0       | 0       | 1       | 0       | 0       | 0       | 0       | 0       | 0       |
| 5    | 0       | 1       | 0       | 1       | 0       | 0       | 0       | 0       | 0       | 1       | 0       | 0       | 0       | 0       | 0       | 0       |
| 6    | 0       | 1       | 1       | 1       | 0       | 0       | 0       | 0       | 0       | 1       | 0       | 0       | 1       | 0       | 0       | 0       |
| 7    | NA      | NA      | NA      | NA      | NA      | NA      | NA      | NA      | NA      | NA      | NA      | NA      | NA      | NA      | NA      | NA      |
| 9    | 0       | 1       | 1       | 1       | 0       | 0       | 0       | 0       | 0       | 1       | 0       | 0       | 0       | 0       | 0       | 0       |
| 10   | 0       | 1       | 0       | 0       | 0       | 0       | 0       | 0       | 0       | 1       | 0       | 0       | 1       | 0       | 0       | 0       |
| 11   | 0       | 0       | 1       | 1       | 0       | 0       | 0       | 0       | 0       | 1       | 0       | 0       | 1       | 0       | 0       | 0       |
| 12   | 0       | 1       | 0       | 1       | 0       | 0       | 0       | 0       | 0       | 1       | 0       | 0       | 1       | 0       | 0       | 0       |
| 13   | 0       | 1       | 1       | 0       | 0       | 0       | 0       | 0       | 0       | 1       | 0       | 0       | 1       | 0       | 0       | 0       |
| 14   | 0       | 1       | 0       | 0       | 0       | 0       | 0       | 0       | 0       | 0       | 0       | 0       | 1       | 0       | 0       | 0       |
| 15   | 0       | 0       | 1       | 0       | 0       | 0       | NA      | NA      | NA      | NA      | NA      | NA      | NA      | NA      | NA      | NA      |
| 16   | NA      | NA      | NA      | NA      | NA      | NA      | NA      | NA      | NA      | NA      | NA      | NA      | NA      | NA      | NA      | NA      |
| 17   | NA      | NA      | NA      | NA      | NA      | NA      | NA      | NA      | NA      | NA      | NA      | NA      | NA      | NA      | NA      | NA      |
| 18   | 0       | 1       | 1       | 0       | 0       | 0       | 0       | 0       | 0       | 1       | 0       | 0       | 1       | 0       | 0       | 0       |
| 19   | NA      | NA      | NA      | NA      | NA      | NA      | 0       | 0       | 0       | 0       | 0       | 0       | 1       | 0       | 0       | 0       |
| 20   | 0       | 1       | 1       | 0       | 0       | 0       | 0       | 0       | 0       | 0       | 0       | 0       | 1       | 0       | 0       | 0       |
| 21   | 0       | 1       | 1       | 0       | 0       | 0       | 0       | 0       | 0       | 1       | 0       | 0       | 1       | 0       | 0       | 0       |
| 22   | NA      | NA      | NA      | NA      | NA      | NA      | NA      | NA      | NA      | NA      | NA      | NA      | NA      | NA      | NA      | NA      |
| 23   | NA      | NA      | NA      | NA      | NA      | NA      | 0       | 0       | 0       | 0       | 0       | 1       | 1       | 0       | 0       | 0       |
| 24   | NA      | NA      | NA      | NA      | NA      | NA      | 0       | 0       | 0       | 0       | 0       | 0       | 1       | 1       | 0       | 0       |
| 25   | 0       | 0       | 1       | 0       | 0       | 0       | 0       | 0       | 0       | 0       | 0       | 0       | 0       | 1       | 1       | 0       |
| 26   | 0       | 0       | 1       | 1       | 0       | 0       | 0       | 0       | 0       | 1       | 0       | 0       | 1       | 0       | 0       | 0       |
| 27   | 0       | 0       | 1       | 1       | 0       | 0       | 0       | 0       | 0       | 1       | 0       | 0       | 1       | 0       | 0       | 0       |
| 28   | NA      | NA      | NA      | NA      | NA      | NA      | NA      | NA      | NA      | NA      | NA      | NA      | NA      | NA      | NA      | NA      |
| 29   | NA      | NA      | NA      | NA      | NA      | NA      | 0       | 0       | 0       | 1       | 0       | 0       | 1       | 0       | 0       | 0       |
| 30   | 0       | 0       | 1       | 0       | 0       | 0       | 0       | 0       | 0       | 0       | 0       | 0       | 1       | 0       | 0       | 0       |
| 31   | NA      | NA      | NA      | NA      | NA      | NA      | 0       | 0       | 0       | 0       | 0       | 1       | 1       | 0       | 0       | 0       |
| 32   | 0       | 0       | 1       | 0       | 0       | 0       | 0       | 0       | 0       | 0       | 0       | 0       | 1       | 0       | 0       | 0       |
| 33   | NA      | NA      | NA      | NA      | NA      | NA      | NA      | NA      | NA      | NA      | NA      | NA      | NA      | NA      | NA      | NA      |
| 34   | 0       | 0       | 1       | 0       | 0       | 0       | 0       | 0       | 0       | 0       | 0       | 0       | 1       | 0       | 0       | 0       |
| 35   | 0       | 0       | 1       | 0       | 0       | 0       | 0       | 0       | 0       | 0       | 0       | 0       | 1       | 1       | 0       | 0       |
| 36   | 0       | 1       | 0       | 0       | 0       | 0       | 0       | 0       | 0       | 1       | 1       | 0       | 0       | 0       | 0       | 0       |
| 37   | NA      | NA      | NA      | NA      | NA      | NA      | 0       | 0       | 0       | 1       | 0       | 0       | 1       | 0       | 0       | 0       |
| 38   | 0       | 0       | 1       | 0       | 0       | 0       | 0       | 0       | 0       | 1       | 0       | 0       | 0       | 1       | 0       | 0       |
| 39   | NA      | NA      | NA      | NA      | NA      | NA      | NA      | NA      | NA      | NA      | NA      | NA      | NA      | NA      | NA      | NA      |
| 40   | 0       | 1       | 1       | 0       | 0       | 0       | 0       | 0       | 0       | 1       | 0       | 0       | 1       | 0       | 0       | 0       |
| 41   | 0       | 0       | 1       | 1       | 0       | 0       | 0       | 0       | 0       | 1       | 0       | 0       | 1       | 0       | 0       | 0       |
| 42   | NA      | NA      | NA      | NA      | NA      | NA      | 0       | 0       | 1       | 0       | 0       | 0       | 1       | 0       | 0       | 0       |
| 43   | NA      | NA      | NA      | NA      | NA      | NA      | 0       | 0       | 0       | 0       | 0       | 0       | 1       | 0       | 0       | 0       |
| 44   | NA      | NA      | NA      | NA      | NA      | NA      | 0       | 0       | 0       | 1       | 0       | 0       | 1       | 0       | 0       | 0       |
| 45   | 0       | 1       | 0       | 0       | 0       | 0       | 0       | 0       | 1       | 0       | 0       | 0       | 1       | 0       | 0       | 0       |
| 46   | 0       | 0       | 1       | 0       | 1       | 0       | 0       | 0       | 1       | 1       | 0       | 0       | 0       | 1       | 0       | 1       |
| 47   | 0       | 0       | 1       | 1       | 0       | 0       | 0       | 0       | 0       | 1       | 0       | 0       | 1       | 0       | 0       | 0       |

Table S3 Continued.

| Code | M31_212 | M31_220 | M31_223 | M31_224 | M31_225 | M31_236 | M34_157 | M34_159 | M34_163 | M34_165 | M34_167 | M34_168 | M34_169 | M34_171 | M34_175 | M34_177 |
|------|---------|---------|---------|---------|---------|---------|---------|---------|---------|---------|---------|---------|---------|---------|---------|---------|
| 48   | NA      | NA      | NA      | NA      | NA      | NA      | 1       | 0       | 1       | 0       | 0       | 0       | 0       | 0       | 0       | 0       |
| 49   | 0       | 1       | 1       | 0       | 0       | 0       | 0       | 0       | 0       | 0       | 0       | 0       | 1       | 0       | 0       | 0       |
| 50   | NA      | NA      | NA      | NA      | NA      | NA      | 0       | 0       | 0       | 0       | 0       | 0       | 1       | 0       | 0       | 0       |
| 51   | 0       | 1       | 0       | 0       | 0       | 0       | 0       | 0       | 0       | 1       | 0       | 0       | 1       | 0       | 0       | 0       |
| 52   | 0       | 1       | 0       | 0       | 0       | 0       | 0       | 0       | 0       | 1       | 0       | 0       | 1       | 0       | 0       | 0       |
| 53   | 0       | 1       | 0       | 1       | 0       | 0       | 0       | 0       | 1       | 1       | 0       | 0       | 0       | 0       | 0       | 0       |
| 54   | NA      | NA      | NA      | NA      | NA      | NA      | 0       | 0       | 0       | 1       | 0       | 0       | 1       | 1       | 0       | 0       |
| 55   | 0       | 1       | 0       | 0       | 0       | 0       | 0       | 0       | 0       | 1       | 0       | 0       | 1       | 0       | 0       | 0       |
| 56   | 1       | 0       | 0       | 1       | 1       | 1       | 1       | 0       | 1       | 0       | 0       | 0       | 0       | 0       | 0       | 0       |
| 57   | 0       | 0       | 1       | 1       | 0       | 0       | 0       | 0       | 0       | 1       | 0       | 0       | 1       | 0       | 0       | 0       |
| 58   | NA      | NA      | NA      | NA      | NA      | NA      | NA      | NA      | NA      | NA      | NA      | NA      | NA      | NA      | NA      | NA      |
| 59   | 0       | 0       | 0       | 1       | 0       | 0       | 0       | 0       | 1       | 0       | 0       | 0       | 1       | 0       | 0       | 0       |
| 60   | 0       | 1       | 0       | 1       | 0       | 0       | 0       | 0       | 1       | 0       | 0       | 0       | 1       | 0       | 0       | 0       |
| 61   | 0       | 1       | 0       | 0       | 0       | 0       | 0       | 0       | 0       | 1       | 0       | 0       | 1       | 0       | 0       | 0       |
| 62   | 0       | 1       | 1       | 0       | 0       | 0       | 0       | 0       | 0       | 1       | 0       | 0       | 1       | 0       | 0       | 0       |
| 63   | 0       | 0       | 1       | 1       | 0       | 0       | 0       | 0       | 0       | 1       | 0       | 0       | 1       | 0       | 0       | 0       |
| 64   | 0       | 1       | 1       | 0       | 0       | 0       | 0       | 0       | 0       | 0       | 0       | 0       | 1       | 0       | 0       | 0       |
| 65   | 0       | 0       | 1       | 0       | 0       | 0       | 0       | 0       | 0       | 0       | 0       | 0       | 1       | 0       | 0       | 0       |
| 66   | 0       | 1       | 0       | 1       | 0       | 0       | 0       | 0       | 0       | 1       | 0       | 0       | 0       | 0       | 0       | 0       |
| 67   | 0       | 0       | 0       | 1       | 0       | 0       | 0       | 0       | 1       | 0       | 0       | 0       | 1       | 0       | 0       | 0       |
| 68   | 0       | 0       | 1       | 0       | 0       | 0       | 0       | 0       | 0       | 0       | 0       | 0       | 1       | 0       | 1       | 0       |
| 69   | 0       | 0       | 1       | 0       | 0       | 0       | 0       | 0       | 0       | 0       | 0       | 0       | 1       | 1       | 1       | 0       |
| 70   | 0       | 1       | 1       | 0       | 0       | 0       | 0       | 0       | 0       | 1       | 0       | 0       | 1       | 0       | 0       | 0       |
| 71   | 0       | 0       | 1       | 0       | 0       | 0       | 0       | 0       | 0       | 0       | 0       | 0       | 1       | 0       | 0       | 0       |
| 72   | 0       | 0       | 1       | 1       | 0       | 0       | 0       | 0       | 0       | 1       | 0       | 0       | 1       | 0       | 0       | 0       |
| 73   | 0       | 0       | 1       | 1       | 0       | 0       | 0       | 0       | 1       | 0       | 0       | 0       | 1       | 0       | 0       | 0       |
| 74   | 0       | 0       | 1       | 0       | 0       | 0       | 0       | 0       | 0       | 0       | 0       | 0       | 1       | 0       | 0       | 0       |
| 75   | 0       | 0       | 1       | 1       | 0       | 0       | 0       | 0       | 0       | 1       | 0       | 0       | 1       | 0       | 0       | 0       |
| 76   | 0       | 0       | 1       | 1       | 0       | 0       | 0       | 0       | 0       | 1       | 0       | 0       | 1       | 0       | 0       | 0       |
| 77   | 0       | 0       | 1       | 0       | 0       | 0       | 0       | 0       | 0       | 0       | 0       | 0       | 1       | 0       | 0       | 0       |
| 78   | NA      | NA      | NA      | NA      | NA      | NA      | 0       | 1       | 1       | 1       | 0       | 0       | 1       | 0       | 0       | 0       |
| 79   | 0       | 1       | 1       | 0       | 0       | 0       | 0       | 0       | 0       | 1       | 0       | 0       | 1       | 0       | 0       | 0       |
| 80   | 0       | 0       | 1       | 1       | 0       | 0       | 0       | 0       | 0       | 1       | 0       | 0       | 1       | 0       | 0       | 0       |
| 81   | 0       | 0       | 1       | 1       | 0       | 0       | 0       | 0       | 0       | 1       | 0       | 0       | 1       | 0       | 0       | 0       |
| 82   | 0       | 0       | 1       | 1       | 0       | 0       | 0       | 0       | 0       | 1       | 0       | 0       | 1       | 0       | 0       | 0       |
| 83   | 0       | 0       | 1       | 1       | 0       | 0       | 0       | 0       | 0       | 1       | 1       | 0       | 1       | 0       | 0       | 0       |
| 84   | 0       | 1       | 1       | 0       | 0       | 0       | 0       | 0       | 0       | 1       | 0       | 0       | 0       | 1       | 0       | 0       |
| 85   | 0       | 1       | 1       | 0       | 0       | 0       | 0       | 0       | 0       | 1       | 0       | 0       | 1       | 1       | 0       | 0       |
| 86   | 0       | 1       | 1       | 1       | 0       | 0       | 0       | 0       | 0       | 1       | 0       | 0       | 1       | 0       | 0       | 0       |
| 87   | 0       | 0       | 1       | 1       | 0       | 0       | 0       | 0       | 1       | 0       | 0       | 0       | 1       | 0       | 0       | 0       |
| 88   | 0       | 0       | 1       | 1       | 0       | 0       | 0       | 0       | 1       | 0       | 0       | 0       | 1       | 0       | 0       | 0       |
| 89   | 0       | 0       | 1       | 0       | 0       | 0       | 0       | 0       | 1       | 0       | 0       | 0       | 1       | 0       | 0       | 0       |
| 90   | 0       | 1       | 1       | 0       | 0       | 0       | 0       | 0       | 0       | 1       | 0       | 0       | 1       | 0       | 0       | 0       |
| 91   | 0       | 0       | 1       | 0       | 0       | 0       | 0       | 0       | 0       | 0       | 0       | 0       | 1       | 1       | 0       | 0       |
| 92   | 1       | 0       | 0       | 1       | 1       | 1       | 1       | 1       | 0       | 1       | 0       | 0       | 0       | 0       | 0       | 0       |
